# Supplementary material for: Genome-Wide Identification and Characterization of PIN-FORMED (PIN) Gene Family Reveals Role in Developmental and Various Stress Conditions in Triticum aestivum L
Source: MDPI journal article supplement (doi:10.3390/ijms22147396), 2021-07-09
Supplement: s1 [file s1]

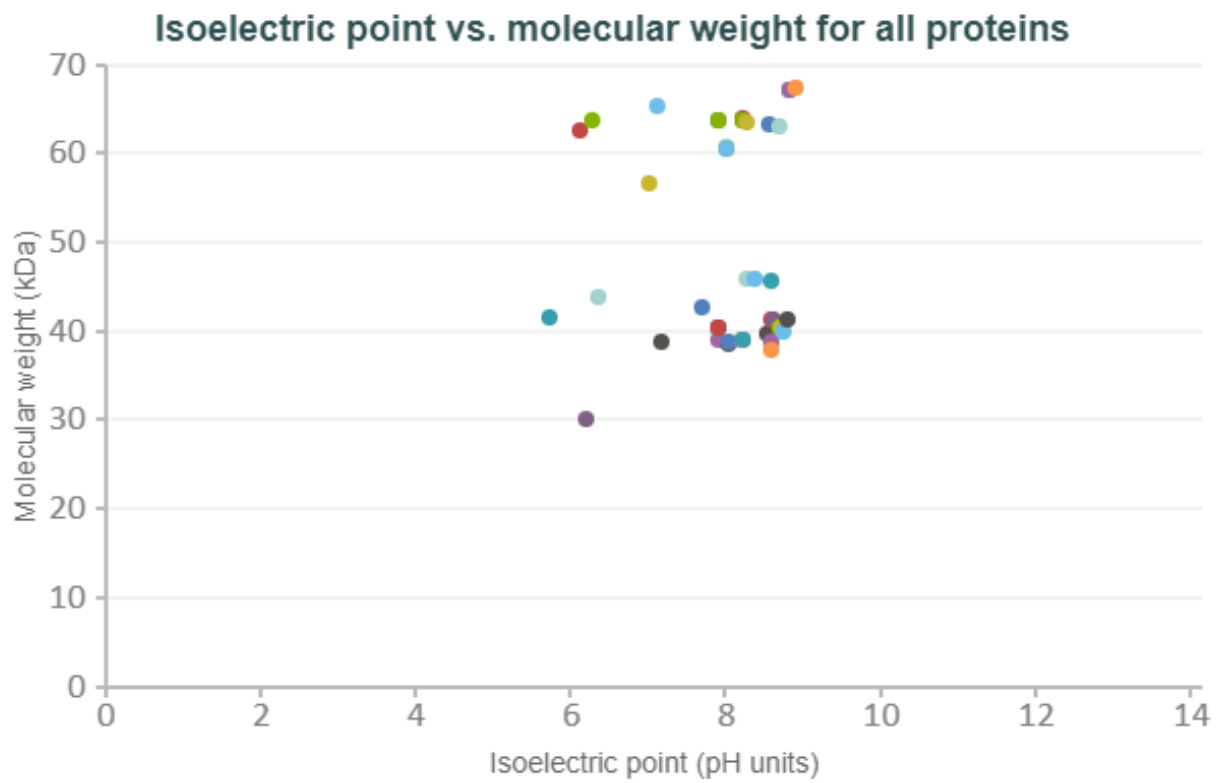

**Figure S1.** Molecular weight (kDa) vs. isoelectric point plots of TaPIN genes.

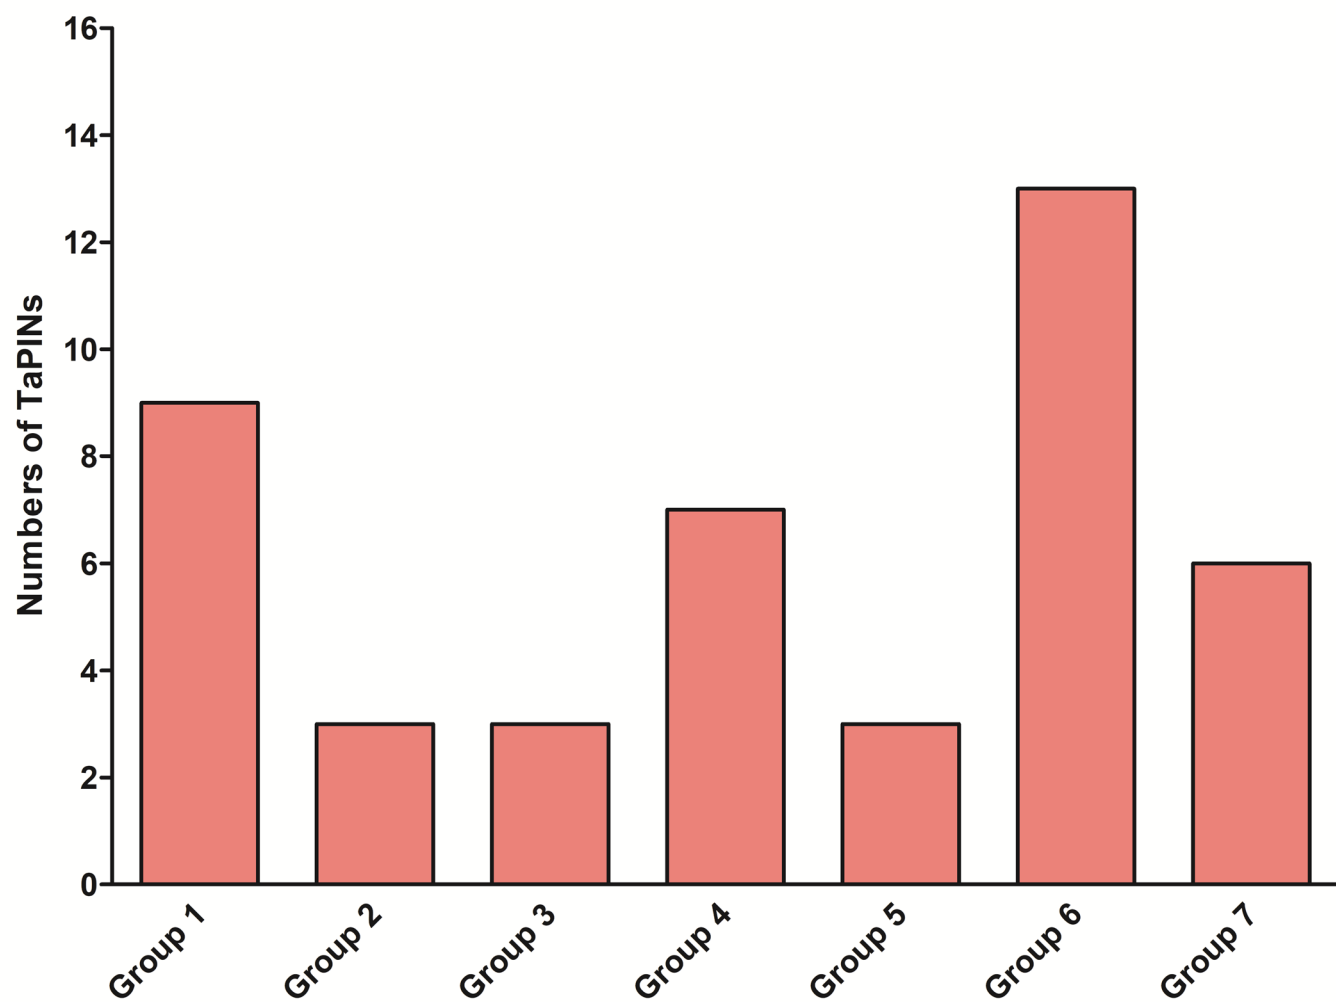

**Figure S2.** Distribution of TaPINs in different group of phylogenetic tree.

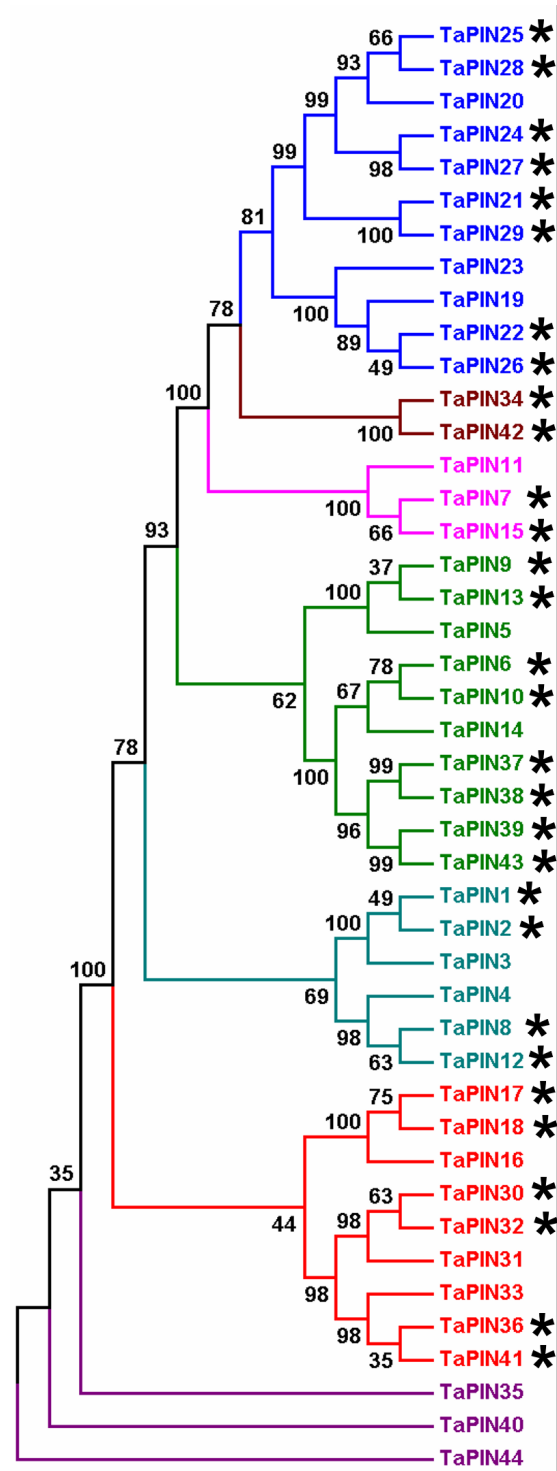

**Figure S3:** Phylogenetic analysis of TaPIN genes. A phylogenetic tree was constructed using MEGAX with the neighbor-joining (NJ) method and 1000 bootstrap replications. Black asterisk indicate the duplicated genes.

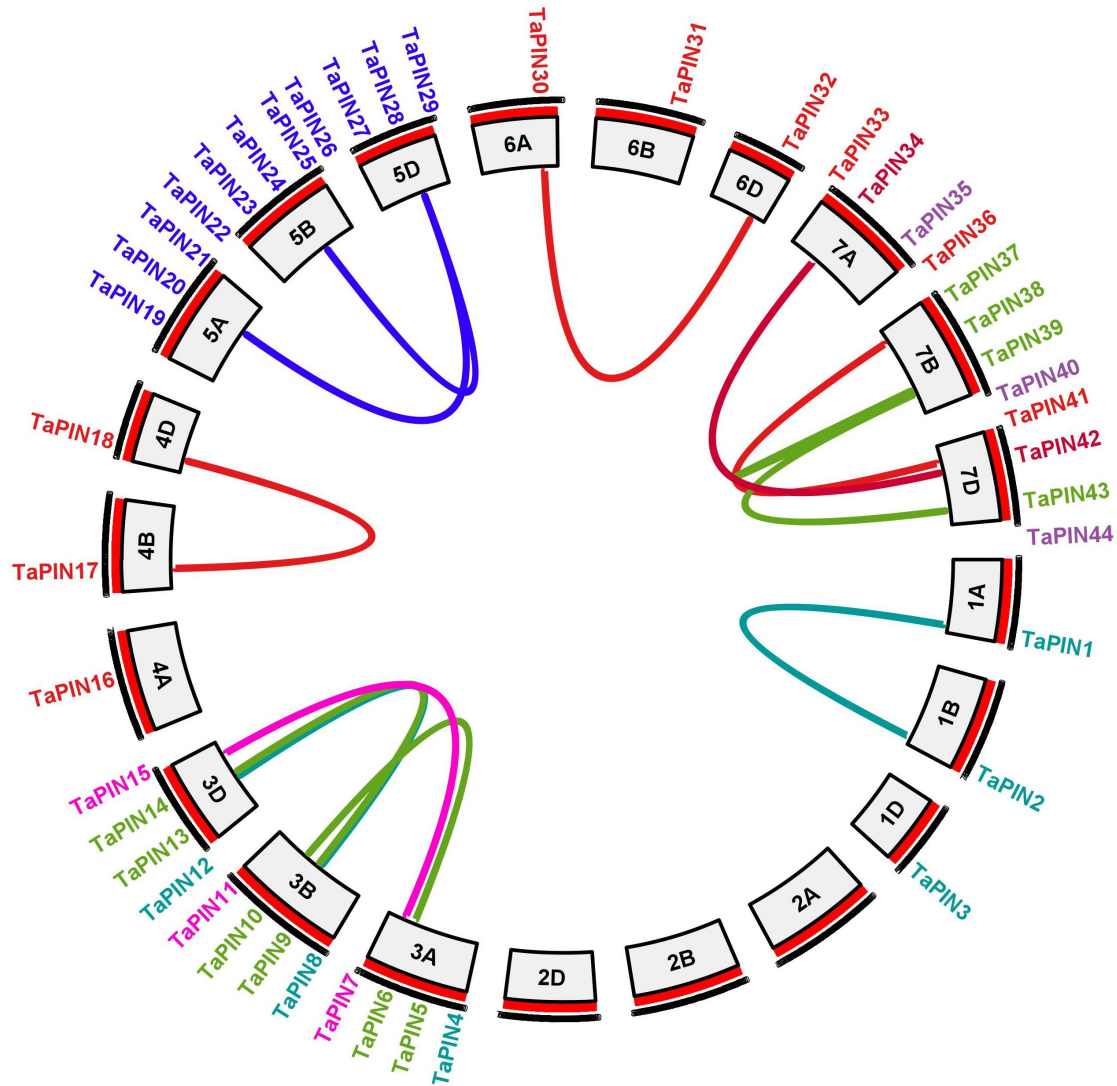

**Figure S4:** Chromosomal distribution and duplicated PIN gene pairs in wheat. Duplicated PIN gene pairs are connected with lines with distinct colors. The figure was generated using TBtools.



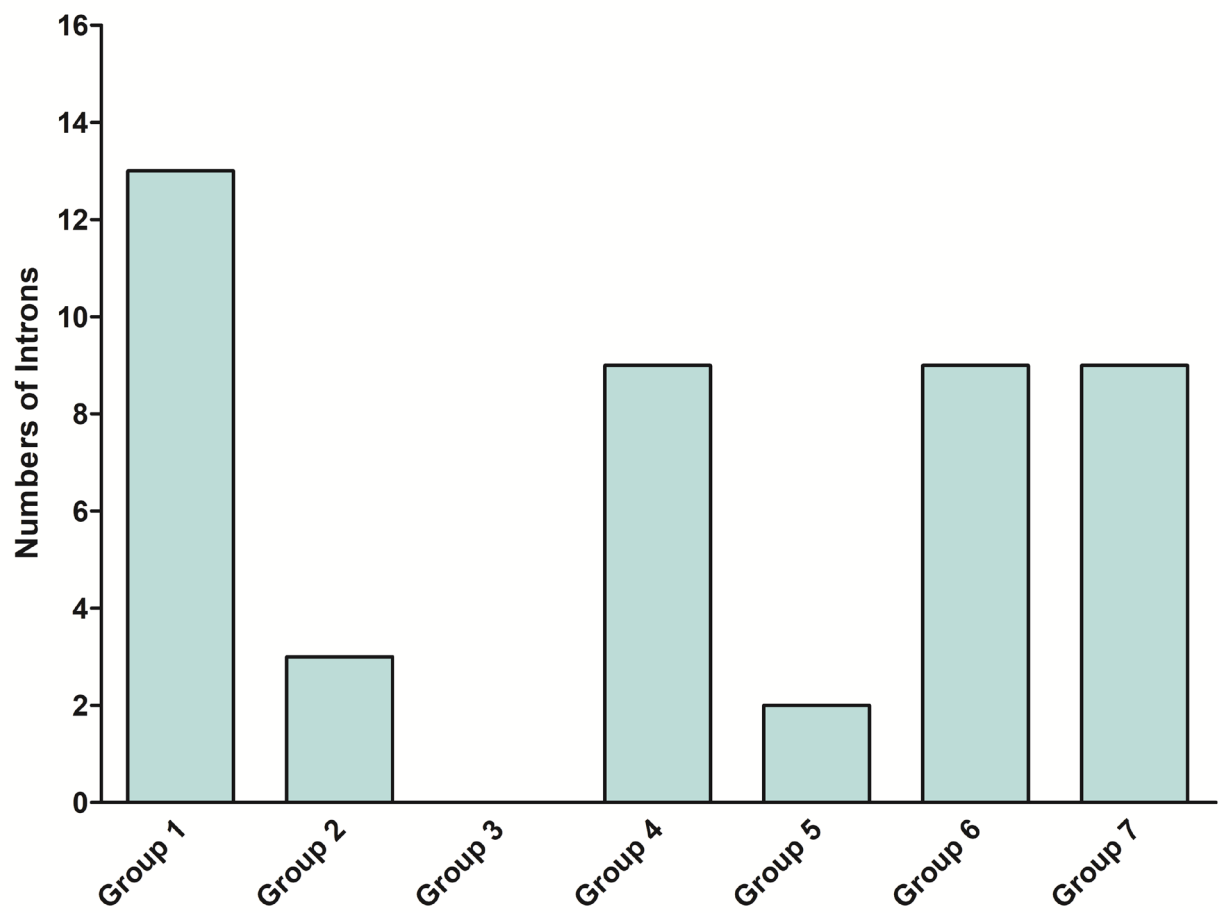

**Figure S5.** Distribution of number of introns of TaPINs genes in different group of phylogenetic tree.

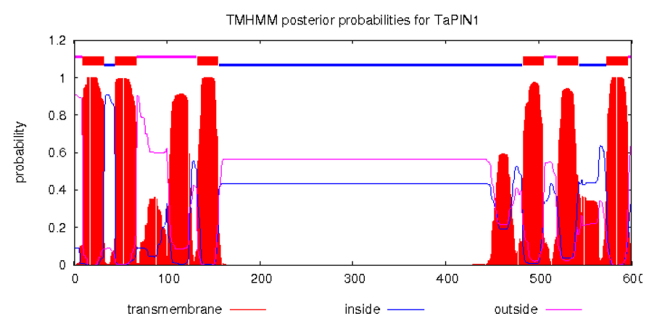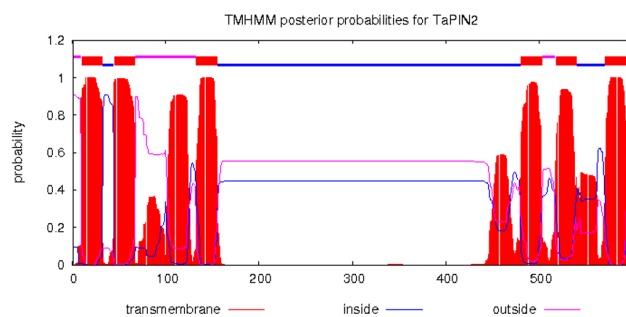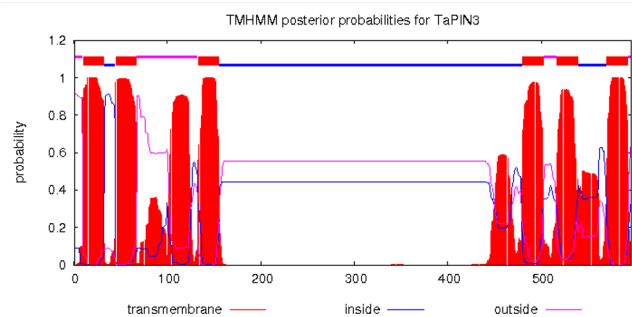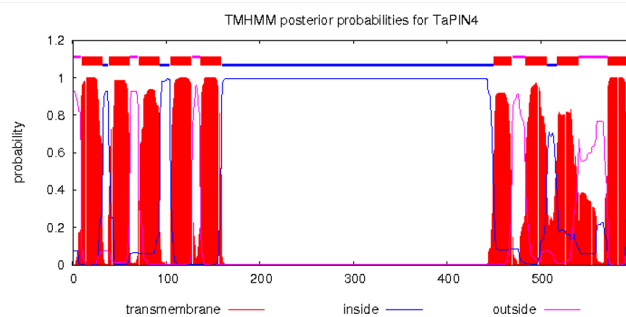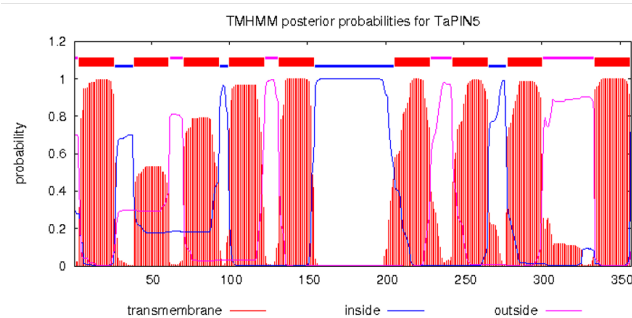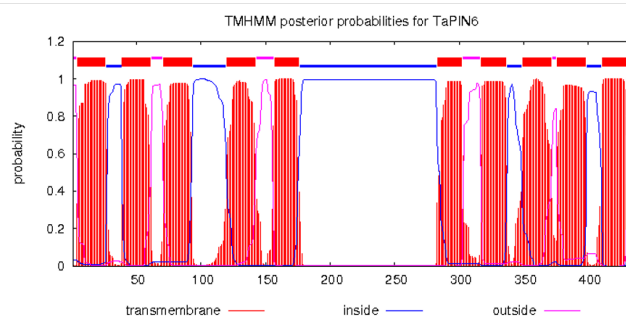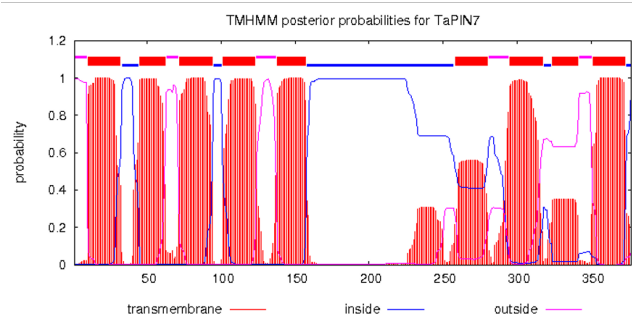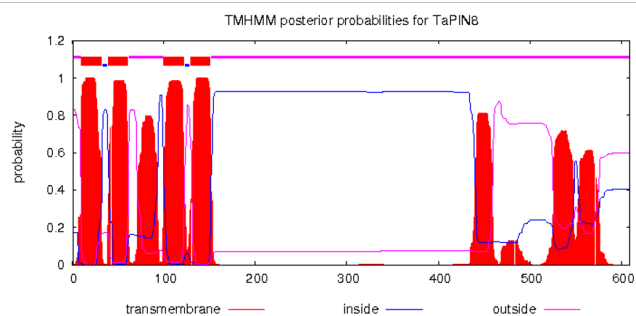

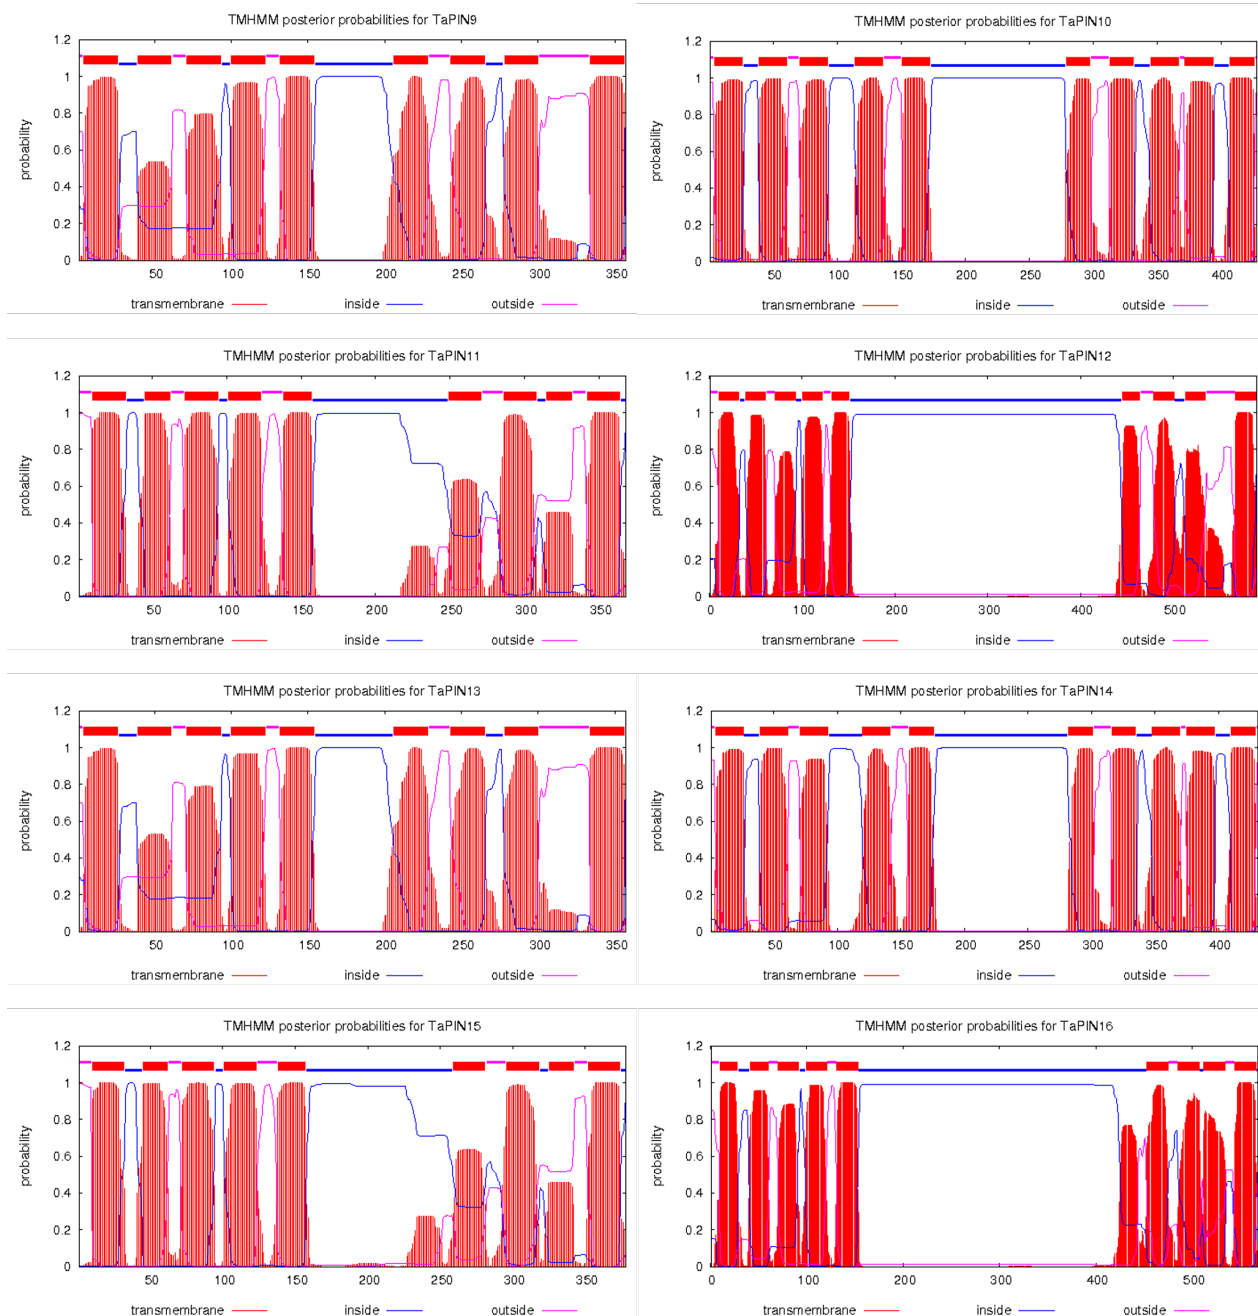

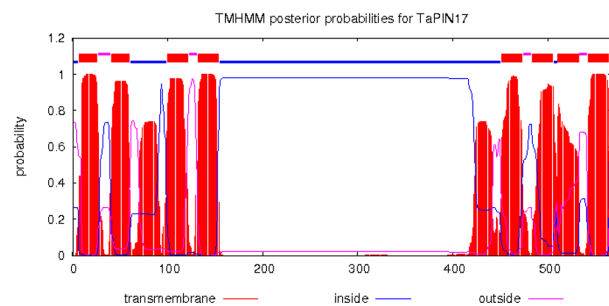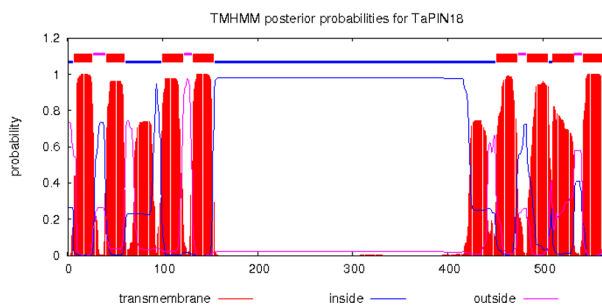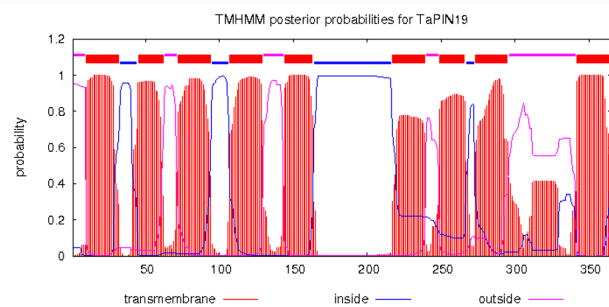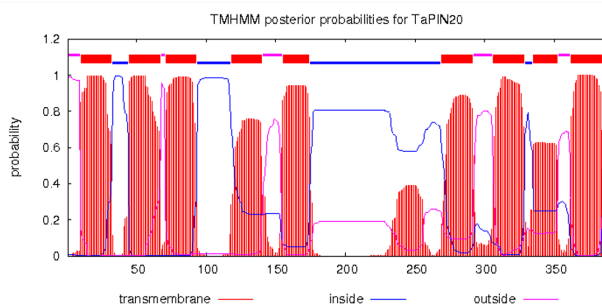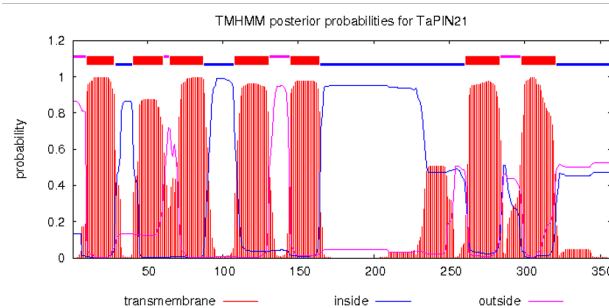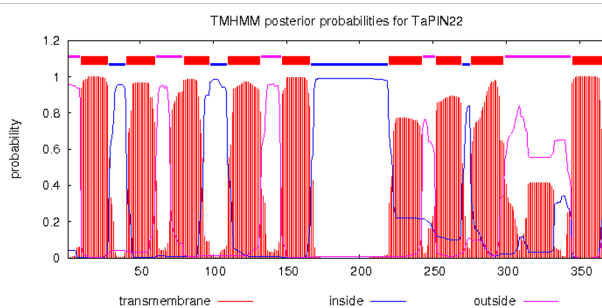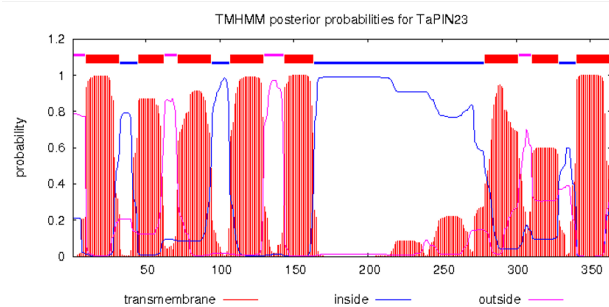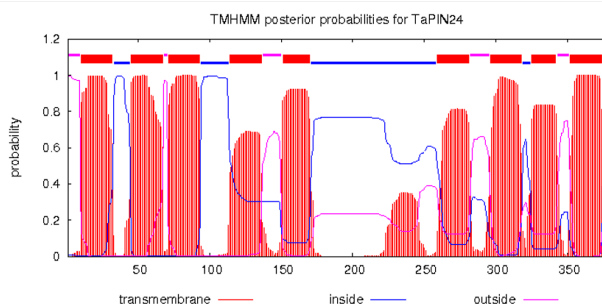

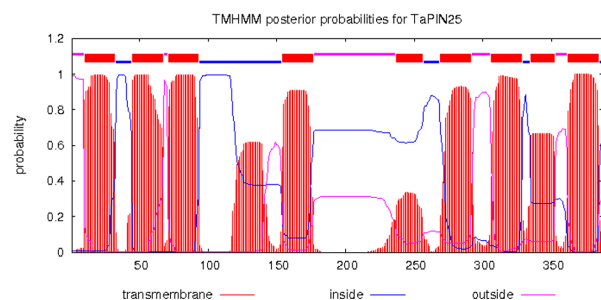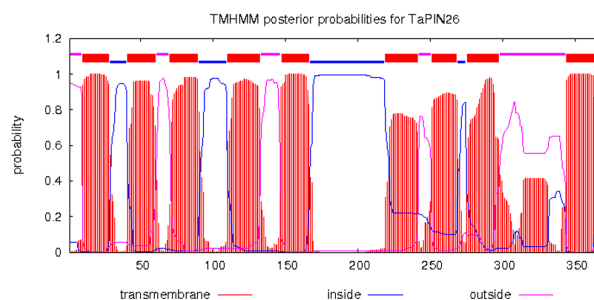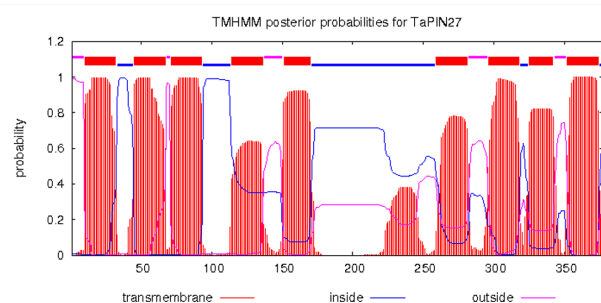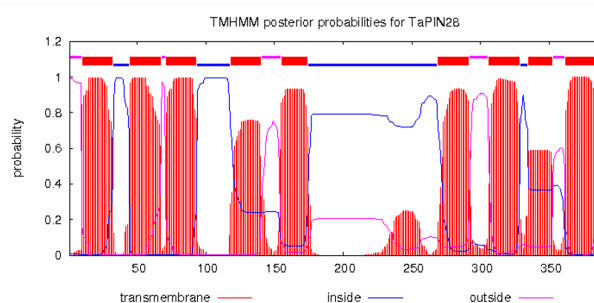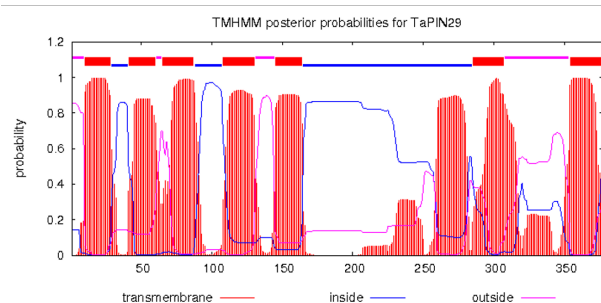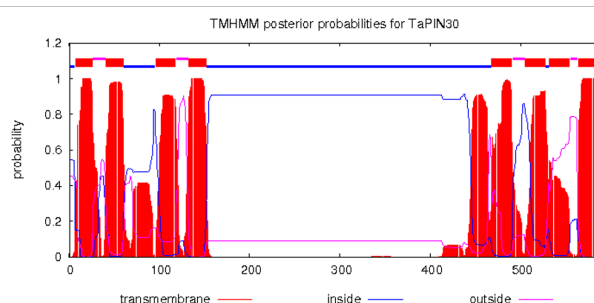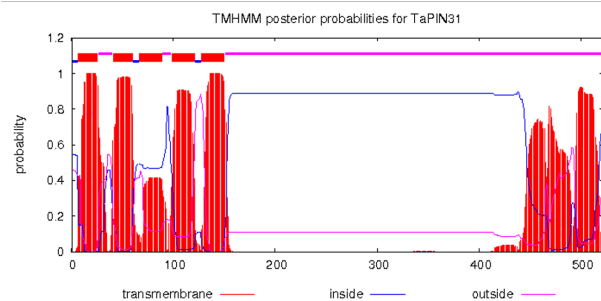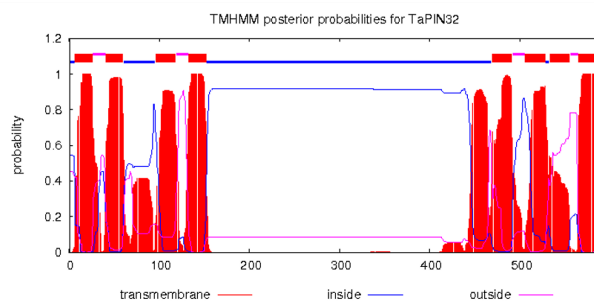

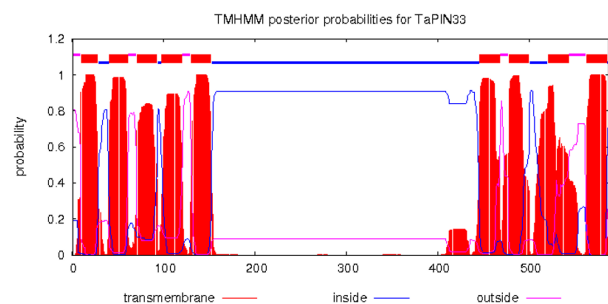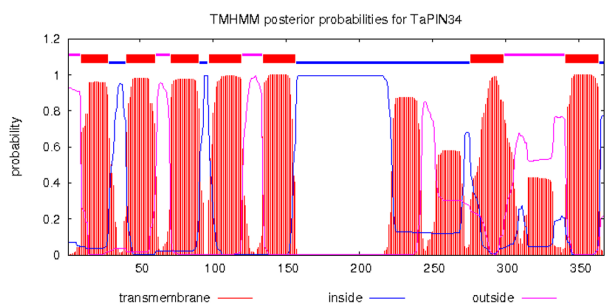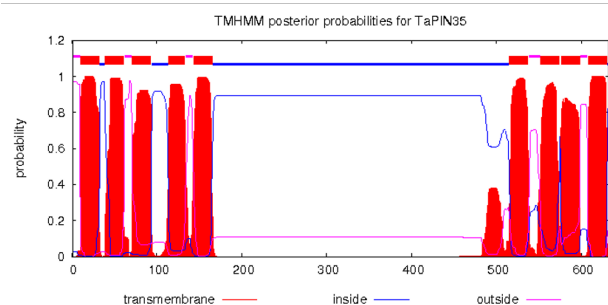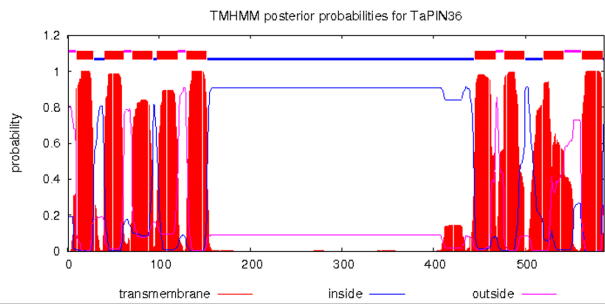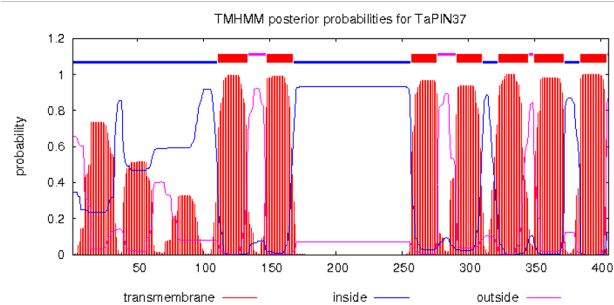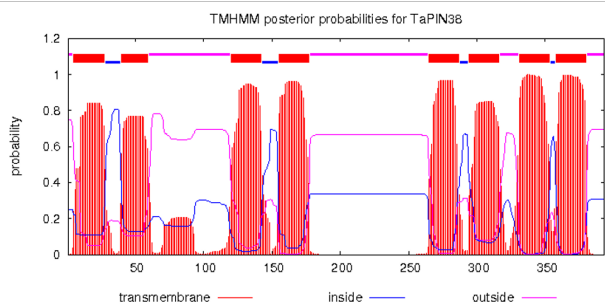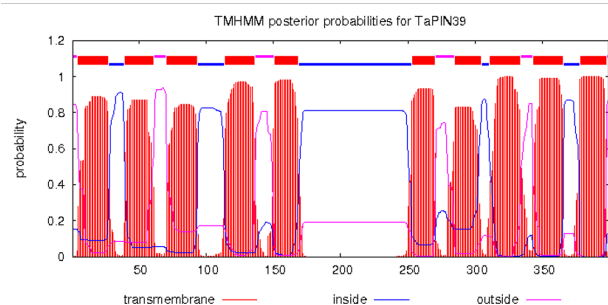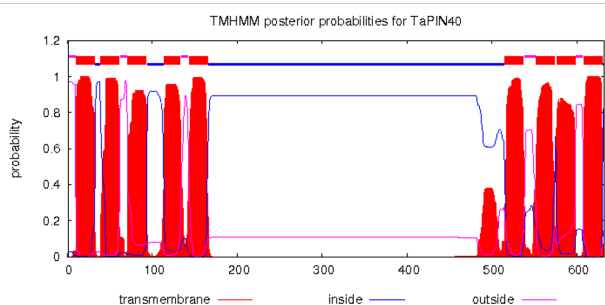

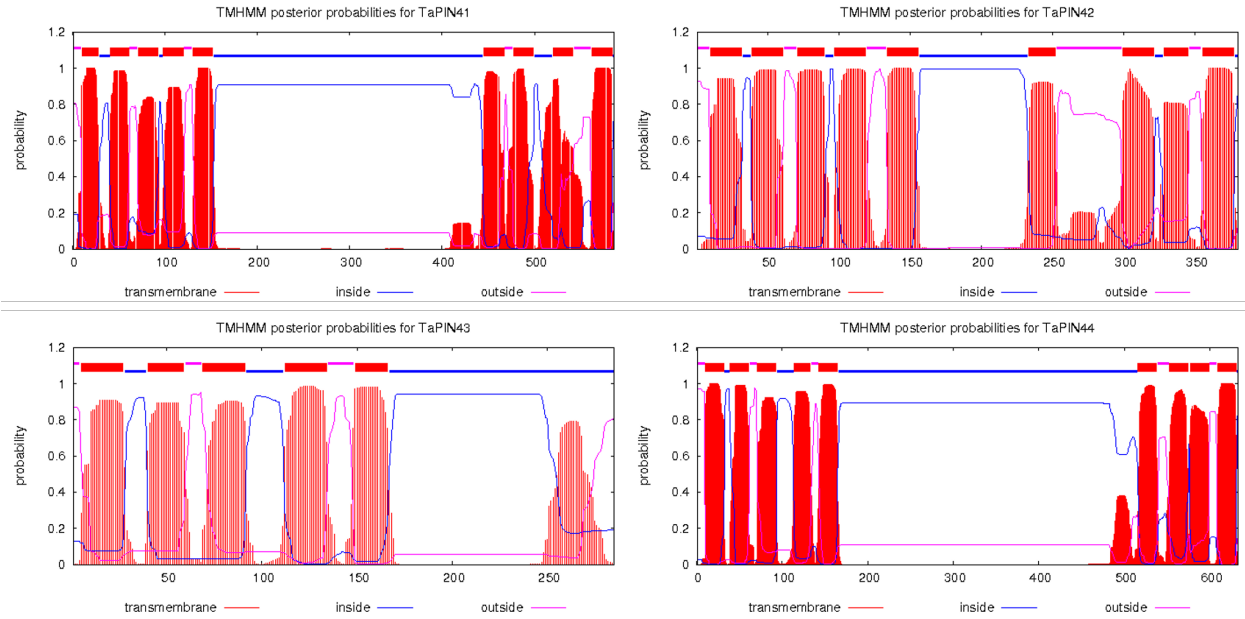

**Figure S6.** The Predicted Transmembrane Helices of the TaPIN Proteins. The transmembrane domains were identified using TMHMM2: ([www.cbs.dtu.dk/services/TMHMM/](http://www.cbs.dtu.dk/services/TMHMM/)) and SOSUI software tools (<http://www.cbs.dtu.dk>, <http://harrier.nagahama-i-bio.ac.jp>). The red peaks representing the predicted transmembrane domain and blue color line indicate the central hydrophobic loop of proteins.







TaPIN1 : GSHAEACAEAPDGSMEVVRSSAASLSRRSLNGAAAGMPS-----FARESSVTGVEIFSVSSSNHTPRGSSFTHGDFSATTGGGGGAAAFALPP---PPFP : 281  
TaPIN2 : GSHAEACAEAPDGSMEVVRSSAASVSRRSLHNGAAAGMS-----PPRGSNLTGMEIYSVSSSNHTPRGSSFTHGDFSATTGGGG-CAAFALPP---PPFP : 279  
TaPIN3 : GSHAEACAEAPDGSMEVVRSSAASVSRRSLHNDAAAGMS-----PPRGSNLTGMEIYSVSSSNHTPRGSSFTHGDFSATTGGGG-AAAFALPP---PPF : 278  
TaPIN4 : GGHAEAESEADGRLHVTVRRSSVS-RRSTLL-----VTPRPSNLTGAEIYSLSSCNPTPRGN-FNQADFFAVVVG-----AP : 264  
TaPIN5 : -----EEAGTLG-----ATQQTQYQEGQSGVSAARC----- : 198  
TaPIN6 : ---NDEAVVAAKRAHEVTVNIEIT-----EVAFASTAQKDLADNTTTVAKETADA----- : 255  
TaPIN7 : ---KADAEAPT-----AV-----AVLVVGVEEVGGKPS----- : 214  
TaPIN8 : GGRAETSEADGRLHVTVRRSSVS-RRSTLL-----VTPRPSNLTGAEIYSLSSCNPTPRGN-FNQADFFAVVVG-----AP : 258  
TaPIN9 : -----EEAGTLG-----ATQQTQYQEGQSGVSAARC----- : 198  
TaPIN10 : ---NDEAVVAAKRAHEVTVNIEIT-----EVAASASTAQKDLADNTTTVAKETADA----- : 251  
TaPIN11 : ---KADAEAPT-----GAEEVGGKPS----- : 205  
TaPIN12 : GGRAETSEADGRLHVTVRRSSVS-RRSTLL-----ATPRPSNLTGAEIYSLSSCNPTPRGN-FNQADFFAVVVG-----AP : 258  
TaPIN13 : -----EEAGTLG-----ATQQTQYQEGQSGVSAARC----- : 198  
TaPIN14 : ---NDEAVVAAKRAHEVTVNIEIT-----EVAFASTVQKDLADNTTTVAREMTADA----- : 255  
TaPIN15 : ---KADAEAGGG-----AV-----AVLVVGGAEEVGGKPS----- : 215  
TaPIN16 : GADLQAEAEGEDGFMVTVRKSTS--SRSEAACSHSHSHSH--SQSMQPRVSNLSGVEIYSLQSSNPTPRGS-FNHAEFFNIVG-----GA : 272  
TaPIN17 : GADLQAEAEGEDGFMVTVRKSTS--SRSEAACSHSHSHSH--SQSMQPRVSNLSGVEIYSLQSSNPTPRGS-FNHAEFFNIVG-----GA : 272  
TaPIN18 : GADLQAEAEGEDGFMVTVRKSTS--SRSEAACSHSHSHSH--SQSMQPRVSNLSGVEIYSLQSSNPTPRGS-FNHAEFFNIVG-----GA : 272  
TaPIN19 : -----VEDGG-----AEGRRREF----- : 202  
TaPIN20 : ---QAVPGSDDVDR-----FAAAGDGKMAATGWA----- : 224  
TaPIN21 : ---EAPGSDVHR-----FAAAGDGKMAATGCA----- : 216  
TaPIN22 : -----VEDGG-----AEGRRREF----- : 205  
TaPIN23 : -----VEDGG-----AEDSRQR----- : 201  
TaPIN24 : ---CAAGSDD-----GDGKTAATGCA----- : 214  
TaPIN25 : ---CAAPGSDVDR-----FAAAGDGKMAATGWA----- : 224  
TaPIN26 : -----VEDGG-----AEGRRREF----- : 204  
TaPIN27 : ---CAAGSDD-----GDGKTAATGCA----- : 214  
TaPIN28 : ---CAAPGSDVDR-----FAAAGDGKMAATGWA----- : 224  
TaPIN29 : ---EAPGSDVHR-----FAASRDGKMAATGCA----- : 213  
TaPIN30 : SNAIETAEKEDGKIHVTVRRSSA--SRSDIYSRRSMGFS----STTPRPSNLTNAEIYSLQSSNPTPRGS-FNHTDFYSMVGRSSNFGAADAYG--IRTGA : 283  
TaPIN31 : SNAIETAEKEDGKIHVTVRRSSA--SRSDIYSRRSMGFS----STTPRPSNLTNAEIYSLQSSNPTPRGS-FNHTDFYSMVGRSSNFGAADAYG--IRTGA : 283  
TaPIN32 : SNAIETAEKEDGKIHVTVRRSSA--SRSDIYSRRSMGFS----STTPRPSNLTNAEIYSLQSSNPTPRGS-FNHTDFYSMVGRSSNFGAADAYG--VRTGA : 283  
TaPIN33 : RDMIETAEKEDGKIHVTVRRSSA--SRSDIYSRRSMGFS----STTPRPSNLTNAEIYSLQSSNPTPRGS-FNHTDFYSMVGRSSNFAAGDAFGEVVRTGA : 285  
TaPIN34 : ---TSDDRAQHE-----MDVEAAPPTGGRRIR----- : 205  
TaPIN35 : REALHADAEGRDGFVHVIRRSASG--STTGGHGAGRSIYRGASNAMTPRASNLTGVEIYSLQSSNPTPRGS-FNQSDFYSMFNGSKLASPKGQPP--VAGTF : 301  
TaPIN36 : RDMIETAEKEDGKIHVTVRRSSA--SRSDIYSRRSMGFS----STTPRPSNLTNAEIYSLQSSNPTPRGS-FNHTDFYSMVGRSSNFAAGDAFGEVVRTGA : 285  
TaPIN37 : ---EKRAIAAVERVHVTVNVVEST-----EHTRQQ--GMVAGQQAALTEVCAGE----- : 228  
TaPIN38 : ---EKRAIAAVERVHVTVNVVEST-----EHTRQQ--GMVAGQQAALTEVCAGE----- : 236  
TaPIN39 : ---EASPE-----NVEST-----EVQAAQQGMAAASQTTIAVVGEAETHGA----- : 221  
TaPIN40 : REALHADAEGRDGFVHVIRRSASG--STTGGHGAGRSIYRGASNAMTPRASNLTGVEIYSLQSSNPTPRGS-FNQSDFYSMFNGSKLASPKGQPP--VAGGG : 301  
TaPIN41 : RDMIETAEKEDGKIHVTVRRSSA--SRSDIYSRRSMGFS----STTPRPSNLTNAEIYSLQSSNPTPRGS-FNHTDFYSMVGRSSNFAAGDAFGEVVRTGA : 285  
TaPIN42 : ---SSDDARFARFEVSHSDEVV-----DLDEVAAPPTGGRRIR----- : 216  
TaPIN43 : ---EASPE-----NVGST-----EVAAPQPGMAVASQTTIAVVGEVETHAA----- : 219  
TaPIN44 : REALHADAEGRDGFVHVIRRSASG--STTGGHGAGRSIYRGASNAMTPRASNLTGVEIYSLQSSNPTPRGS-FNQSDFYSMFNGSKLASPKGQPP--VAGGG : 301

TaPIN1 : HGAVRASSFGAADLFLSHSSRQHTP-RFSASYDEHAFPRGRSTAAVAFAVEDPKD--NVHMFWDSSGASGASEVSG-LEVLRS--AKESGRRRTFSDATSTNSDS : 379  
TaPIN2 : HGAVRASSFGAADLFLSHSSRQHTP-RFSASYDEHAFPRGRSAAAFAVEDPKD--NVHMFWDSSGASGASEVSG-LEVFRSS--TKESGRRRAPSDTTSINSDS : 377  
TaPIN3 : HGAVRASSFGAADLFLSHSSRQHTP-RFSASYDEHAFPRGRSAAAFAVEDPKD--NVHMFWDSSGASGASEVSG-LEVFRSS--AKESGRRRAPSDATSTNSDS : 376  
TaPIN4 : FARVDGSSFGASEHYSLQSSQGPTPRESNLDEHSAAPK--CAMTDAGAQNHNDAKELHMFVWSSSAFFVSEVVGLEVFVSGG--TGAHLDAAAKEIRMVVFADFP : 366  
TaPIN5 : -----AFR----- : 201  
TaPIN6 : ----- : -  
TaPIN7 : ----- : -  
TaPIN8 : FARVGDSSFGASEHYSVQSSQRPTPRESNLEHSAAGPK--CAMTDAGAQNHNDAKELHMFVWSSSAFFVSEVVGLEVFVSGG--TDAHLDAAAKEIRMVVFADFP : 360  
TaPIN9 : -----AFR----- : 201  
TaPIN10 : ----- : -  
TaPIN11 : ----- : -  
TaPIN12 : FARVGGSSFGASEHYSLQSSQGPTPRESNLDEHSAAGPK--BATTDAGAQNHNDAKELHMFVWSSSAFFVSEVVGLEFMFTGG--AGAHLDAAAKEIRMVVFADFP : 360  
TaPIN13 : -----AFR----- : 201  
TaPIN14 : ----- : -  
TaPIN15 : ----- : -  
TaPIN16 : K---GDEEKGSAGAGNGTGGHSP-QPLP-CALAGKR-----KD---LHMFVWSSSAFFVSEVVGLEFMFTGG--GGADHGDVL-AKGAQAYDEY : 352  
TaPIN17 : K---GDEEKGSAGAG--NGTGGHSP-QPLP-CALAGKR-----KD---LHMFVWSSSAFFVSEVVGLEFMFTGG--GGADHGDVL-AKGAQAYDEY : 350  
TaPIN18 : K---GDEEKGSAGAG--NGTGGHSP-QPLP-CALAGKR-----KD---LHMFVWSSSAFFVSEVVGLEFMFTGG--GGADHGDVL-AKGAQAYDEY : 350  
TaPIN19 : ----- : -  
TaPIN20 : ----- : -  
TaPIN21 : ----- : -  
TaPIN22 : ----- : -  
TaPIN23 : ----- : -  
TaPIN24 : ----- : -  
TaPIN25 : ----- : -  
TaPIN26 : ----- : -  
TaPIN27 : ----- : -  
TaPIN28 : ----- : -  
TaPIN29 : ----- : -  
TaPIN30 : TPRPSNYEEDAPKPKHFAFGAGHYF-AFNP-AVAAAPKPGPKKFAANGCAKGED--LHMFVWSSSAFFVSDVFGGGAPDYN--AAAASPRK-MDGAKERDDY : 379  
TaPIN31 : TPRPSNYEEDAPKPKHFAFGAGHYF-AFNP-AVAAAPKPGPKKFAANGCAKGED--LHMFVWSSSAFFVSDVFGGGAPDYN--AAAASPRKSMDGAKERDDY : 380  
TaPIN32 : TPRPSNYEEDAPKPKHFAFGAGHYF-AFNP-AVAAAPKPGPKKFAANGCAKGED--LHMFVWSSSAFFVSDVFGGGAPDYN--AAAASPRK-MDGAKERDDY : 379  
TaPIN33 : TPRPSNYEEDAKAGNNNNNNKYGQYP-AFNP-AMAAAPQK-FAKKAANGCAKGEDGDKLHMFVWSSSAFFVSDVFGNGTEAYND--AAAKDVRVA--AASPRKAD : 381  
TaPIN34 : ----- : -  
TaPIN35 : GARGQGLDEQVANKFKGGEAAAFYP-AFNPMMMEAPR-KKELGGSNSNSNKE--LHMFVWSSSAFFVSEANLNAVNHAASTDFAAAPFAAATPRDGATPRGVS : 402  
TaPIN36 : TPRPSNYEEDAKAGNNNNNNKYGQYP-AFNP-AMAAAPQK-FAKKAANGCAKGEDGDKLHMFVWSSSAFFVSDVFGNGTEAYND--AAAKDVRVA--AASPRKAD : 380  
TaPIN37 : ----- : -  
TaPIN38 : ----- : -  
TaPIN39 : ----- : -  
TaPIN40 : GARGQGLDEQVANKFKGGEAAAFYP-AFNPMMMEAPR-KKELGGSNSNSNKE--LHMFVWSSSAFFVSEANLNAVNHAASTDFAAAPFAAATPRDGATPRGVS : 402  
TaPIN41 : TPRPSNYEEDAKAGNNNNNNKYGQYP-AFNP-AMAAAPQK-FAKKAANGCAKGEDGDKLHMFVWSSSAFFVSDVFGNGTEAYND--AAAKDVRVA--AASPRKAD : 380  
TaPIN42 : ----- : -  
TaPIN43 : ----- : -  
TaPIN44 : GARGQGLDEQVANKFKGGEAAAFYP-AFNPMMMEAPRKKELGGSNSNSNKE--LHMFVWSSSAFFVSEANLNAVNHAASTDFAAAPFAAATPRDGATPRGVS : 403

TaPIN1 : SR---INRTGAAGVERVISEAAQESLERLEAGTEATEKEQEQDE-----TKKVGDD--EVGKPFASVLRLLITVWRRLRNFNWASVGLWSLIDEPY : 471  
TaPIN2 : SR---SNRPGATGGERVVKSEAAATQESLERLEAGTEAAEKEQEQDE-----TKKDDGG--EVGKPFASVLRLLITVWRRLRNFNWASVGLWSLIDEPY : 469  
TaPIN3 : SR---SNRPGATGGERVVKSGAAQESLERLEAGTEATGKEQEQDE-----TKKDDGG--EVGKPFASVLRLLITVWRRLRNFNWASVGLWSLIDEPY : 468  
TaPIN4 : QNGSCKENGSGYTAARGGCRKRAVEHDG-DAVQAGPDRLTFRINSSP-----GDEDGAETGRARQHCMPFASVLRLLITVWRRLRNFNWASVGLWSLIDEPY : 466  
TaPIN5 : -----FUIVGMKRLNENITVCIIGLWAMTSSPC : 232  
TaPIN6 : -----EAEQGSPPFAKSTAPSVTHIALAGKRVRIENWASVGLWSLIDEPY : 305  
TaPIN7 : -----WR-LVKTAAEKIARNENWASVEVGIWACVANEL : 248  
TaPIN8 : QNGSCKDNGGYTAAARGGGKAVEDDG-DAVQAGPDRPTAKINSSP-----GDEDGAETG---KHQMPFASVLRLLITVWRRLRNFNWASVGLWSLIDEPY : 457  
TaPIN9 : -----FUIVGMKRLNENITVCIIGLWAMTSSPC : 232  
TaPIN10 : -----EAEKASPPFAKSTAPSVRHHGLAGKRVRIENWASVGLWSLIDEPY : 301  
TaPIN11 : -----WR-LVKTAAEKIARNENWASVEVGIWACVANEL : 239  
TaPIN12 : QNGSCKENGSGYTAARGGGGKAVEDDGDAAVQAGPDRILAAKINSSP-----GDEDGAESGRARQHCMPFASVLRLLITVWRRLRNFNWASVGLWSLIDEPY : 461  
TaPIN13 : -----FUIVGMKRLNENITVCIIGLWAMTSSPC : 232  
TaPIN14 : -----EAS-PPFAKSTAPSVTHIALAGKRVRIENWASVGLWSLIDEPY : 304  
TaPIN15 : -----WR-LVKTAAEKIARNENWASVEVGIWACVANEL : 249  
TaPIN16 : G---RGGGDDFSFFNKNGGVANVDGPTIAKLGSNSTAQLHPKDD-----GEER---AAAMPFASVLRLLITVWRRLRNFNWASVGLWSLIDEPY : 441  
TaPIN17 : G---RGGGDDFSFFNKNGGVANVDGPTIAKLGSNSTAQLHPKDD-----GEER---AAAMPFASVLRLLITVWRRLRNFNWASVGLWSLIDEPY : 439  
TaPIN18 : G---RGGGDDFSFFNKNGGVANVDGPTIAKLGSNSTAQLHPKDD-----GEER---AAAMPFASVLRLLITVWRRLRNFNWASVGLWSLIDEPY : 439  
TaPIN19 : -----WF-LVRAWIRVARNENWASVGLVWACVINE : 236  
TaPIN20 : -----FWAPDRITGLRVGENVVASLGVWASVANE : 259  
TaPIN21 : -----FWAPDRITGLRVGENVVASLGVWASVANE : 251  
TaPIN22 : -----WF-LVRAWIRVARNENWASVGLVWACVINE : 239  
TaPIN23 : -----WF-LVRAWIRVARNENWASVGLVWACVINE : 235  
TaPIN24 : -----FWAPDRITGLRVGENVVASLGVWASVANE : 249  
TaPIN25 : -----FWAPDRITGLRVGENVVASLGVWASVANE : 259  
TaPIN26 : -----WF-LVRAWIRVARNENWASVGLVWACVINE : 238  
TaPIN27 : -----FWAPDRITGLRVGENVVASLGVWASVANE : 249  
TaPIN28 : -----FWAPDRITGLRVGENVVASLGVWASVANE : 259  
TaPIN29 : -----FWAPDRITGLRVGENVVASLGVWASVANE : 248  
TaPIN30 : N---VER-DDFSFGNRGALDRDAEA-----GDEKAMTADFNN-----AMGAG---PTAMPPTSVLRLLITVWRRLRNFNWASVGLWSLIDEPY : 461  
TaPIN31 : N---VER-DDFSFGNRGALDRDTEA-----GDEKAMTADFNN-----AMGAG---PTAMPPTSVLRLLITVWRRLRNFNWASVGLWSLIDEPY : 462  
TaPIN32 : N---VER-DDFSFGNRGALERDAEA-----GDEKAMTADFNN-----GMGAG---PTAMPPTSVLRLLITVWRRLRNFNWASVGLWSLIDEPY : 462  
TaPIN33 : G---VER-DEFSFGNK---ERDAEA-----GDEKAA-AEQGTA-----GLVAA---PTVMPPTSVLRLLITVWRRLRNFNWASVGLWSLIDEPY : 460  
TaPIN34 : -----WF-LVRAWIRVARNENWASVGLVWACVINE : 239  
TaPIN35 : GSVTFVLKKDASSGAVEVEIEDGMMKSEATGLGAKFFVSGSPYVAPRKKGADVPGLEEA---AHMPPFASVLRLLITVWRRLRNFNWASVGLWSLIDEPY : 505  
TaPIN36 : G---VER-DEFSFGNK---ERDAEA-----GDEKAA-AEQGTA-----GLVAA---PTVMPPTSVLRLLITVWRRLRNFNWASVGLWSLIDEPY : 459  
TaPIN37 : -----DDESAEAEEDSLFASPSMRHIAFTGKRVRIENWASVGLWSLIDEPY : 279  
TaPIN38 : -----DDEGAEAEEDSLFASPSMRHIAFTGKRVRIENWASVGLWSLIDEPY : 287  
TaPIN39 : -----DAEVAEAEEDVALPPFMSHIAFTGKRVRIENWASVGLWSLIDEPY : 272  
TaPIN40 : GSVTFVLKKDASSGAVEVEIEDGMMKSEATGLGAKFFVSGSPYVAPRKKGADVPGLEEA---AHMPPFASVLRLLITVWRRLRNFNWASVGLWSLIDEPY : 505  
TaPIN41 : G---VER-DEFSFGNK---ERDAEA-----GDEKAA-AEQGTA-----GLVAA---PTVMPPTSVLRLLITVWRRLRNFNWASVGLWSLIDEPY : 459  
TaPIN42 : -----NL-NASTGMKIARNENWASVGLVWACVINE : 250  
TaPIN43 : -----DAEVAEAEEDVALFAPPSMSHIAFTGKRVRIENWASVGLWSLIDEPY : 269  
TaPIN44 : GIVTFVLKKDASSGAVEVEIEDGMMKSEATGLGAKFFVSGSPYVAPRKKGADVPGLEEA---AHMPPFASVLRLLITVWRRLRNFNWASVGLWSLIDEPY : 506

TaPIN1 : HVTMEATVAKSISILSDAGLGV MFSLG-----LEMAQCR TACGKSNASTV VREIAGVIA : 532  
TaPIN2 : HVTMEATVAKSISILSDAGLGV MFSLG-----LEMAQCR TACGKSNASTV VREIAGVIA : 530  
TaPIN3 : HVTMEATVAKSISILSDAGLGV MFSLG-----LEMAQCR TACGKSNASTV VREIAGVIA : 529  
TaPIN4 : HVSMTVVEKISISILSDAGLGV MFSLG-----LEMAQCR TACGKSNASTV VREIAGVIA : 527  
TaPIN5 : QCLPLVNSISIRLSDAGLGV MFSLG-----LEMAQCR TACGKSNASTV VREIAGVIA : 293  
TaPIN6 : GUKMERLDDSLFTQTITVGTSMFSG-----LEMAQCR TACGKSNASTV VREIAGVIA : 366  
TaPIN7 : HVELSVENSVLIMSRTGLGCMFSGM-----LEMAQCR TACGKSNASTV VREIAGVIA : 309  
TaPIN8 : HVSMTVVEKISISILSDAGLGV MFSLG-----LEMAQCR TACGKSNASTV VREIAGVIA : 563  
TaPIN9 : QCLPLVNSISIRLSDAGLGV MFSLG-----LEMAQCR TACGKSNASTV VREIAGVIA : 293  
TaPIN10 : GUKMERLDDSLFTQTITVGTSMFSG-----LEMAQCR TACGKSNASTV VREIAGVIA : 362  
TaPIN11 : HVELSVENSVLIMSRTGLGCMFSGM-----LEMAQCR TACGKSNASTV VREIAGVIA : 300  
TaPIN12 : HVSMTVVEKISISILSDAGLGV MFSLG-----LEMAQCR TACGKSNASTV VREIAGVIA : 522  
TaPIN13 : QCLPLVNSISIRLSDAGLGV MFSLG-----LEMAQCR TACGKSNASTV VREIAGVIA : 293  
TaPIN14 : GUKMERLDDSLFTQTITVGTSMFSG-----LEMAQCR TACGKSNASTV VREIAGVIA : 365  
TaPIN15 : HVELSVENSVLIMSRTGLGCMFSGM-----LEMAQCR TACGKSNASTV VREIAGVIA : 310  
TaPIN16 : GUEMPEATVAKSISILSDAGLGV MFSLG-----LEMAQCR TACGKSNASTV VREIAGVIA : 502  
TaPIN17 : GUEMPEATVAKSISILSDAGLGV MFSLG-----LEMAQCR TACGKSNASTV VREIAGVIA : 500  
TaPIN18 : GUEMPEATVAKSISILSDAGLGV MFSLG-----LEMAQCR TACGKSNASTV VREIAGVIA : 500  
TaPIN19 : HVTESLDEGSVILMSRTGLGCMFSGM-----LEMAQCR TACGKSNASTV VREIAGVIA : 297  
TaPIN20 : HPEMPEATVAKSISILSDAGLGV MFSLG-----LEMAQCR TACGKSNASTV VREIAGVIA : 320  
TaPIN21 : HPEMPEATVAKSISILSDAGLGV MFSLG-----LEMAQCR TACGKSNASTV VREIAGVIA : 312  
TaPIN22 : HVTESLDEGSVILMSRTGLGCMFSGM-----LEMAQCR TACGKSNASTV VREIAGVIA : 300  
TaPIN23 : HPEMPEATVAKSISILSDAGLGV MFSLG-----LEMAQCR TACGKSNASTV VREIAGVIA : 296  
TaPIN24 : HPEMPEATVAKSISILSDAGLGV MFSLG-----LEMAQCR TACGKSNASTV VREIAGVIA : 310  
TaPIN25 : HPEMPEATVAKSISILSDAGLGV MFSLG-----LEMAQCR TACGKSNASTV VREIAGVIA : 320  
TaPIN26 : HVTESLDEGSVILMSRTGLGCMFSGM-----LEMAQCR TACGKSNASTV VREIAGVIA : 299  
TaPIN27 : HPEMPEATVAKSISILSDAGLGV MFSLG-----LEMAQCR TACGKSNASTV VREIAGVIA : 310  
TaPIN28 : HPEMPEATVAKSISILSDAGLGV MFSLG-----LEMAQCR TACGKSNASTV VREIAGVIA : 320  
TaPIN29 : HPEMPEATVAKSISILSDAGLGV MFSLG-----LEMAQCR TACGKSNASTV VREIAGVIA : 309  
TaPIN30 : NPTMEATVAKSISILSDAGLGV MFSLG-----LEMAQCR TACGKSNASTV VREIAGVIA : 522  
TaPIN31 : NPTMEATVAKSISILSDAGLGV MFSLG-----LEMAQCR TACGKSNASTV VREIAGVIA : 513  
TaPIN32 : NPTMEATVAKSISILSDAGLGV MFSLG-----LEMAQCR TACGKSNASTV VREIAGVIA : 523  
TaPIN33 : NPTMEATVAKSISILSDAGLGV MFSLG-----LEMAQCR TACGKSNASTV VREIAGVIA : 521  
TaPIN34 : RUMPEATVAKSISILSDAGLGV MFSLG-----LEMAQCR TACGKSNASTV VREIAGVIA : 300  
TaPIN35 : NQUMETVAKSISILSDAGLGV MFSLG-----LEMAQCR TACGKSNASTV VREIAGVIA : 566  
TaPIN36 : NPTMEATVAKSISILSDAGLGV MFSLG-----LEMAQCR TACGKSNASTV VREIAGVIA : 520  
TaPIN37 : GUKMERLDDSLFTQTITVGTSMFSG-----LEMAQCR TACGKSNASTV VREIAGVIA : 340  
TaPIN38 : GUKMERLDDSLFTQTITVGTSMFSG-----LEMAQCR TACGKSNASTV VREIAGVIA : 348  
TaPIN39 : RUMPEATVAKSISILSDAGLGV MFSLG-----LEMAQCR TACGKSNASTV VREIAGVIA : 333  
TaPIN40 : NQUMETVAKSISILSDAGLGV MFSLG-----LEMAQCR TACGKSNASTV VREIAGVIA : 566  
TaPIN41 : NPTMEATVAKSISILSDAGLGV MFSLG-----LEMAQCR TACGKSNASTV VREIAGVIA : 520  
TaPIN42 : RUMPEATVAKSISILSDAGLGV MFSLG-----LEMAQCR TACGKSNASTV VREIAGVIA : 311  
TaPIN43 : ---QVE-----SFCSS----- : 277  
TaPIN44 : NQUMETVAKSISILSDAGLGV MFSLG-----LEMAQCR TACGKSNASTV VREIAGVIA : 567



```

TaPIN1 : VSS--AAVGLRCTLRLIAVVQATLPQGI VPFVFAKEYNLHAAILCTGVIFGMLIALPITVLLYYIILGL- : 599
TaPIN2 : VSS--AAVGLRCTLRLIAVVQAALPQGI VPFVFAKEYNLHAAILCTGVIFGMLIAVPTVLLYYIILGL- : 597
TaPIN3 : VSS--AAVGLRCTLRLIAVVQAALPQGI VPFVFAKEYNLHAAILCTGVIFGMLIALPITVLLYYIILGL- : 596
TaPIN4 : AAS--AAVGLRCTLRLKVAIVQAALPQGI VPFVFAKEYNVPEILSTAVIFGMLIALPITITAYYALLGLVH : 595
TaPIN5 : ISS--YAVGMRCTLLKVAIVQAALPQGI VPFVFAKEYNVPEILSTAVIFGMLIAVEAATAYYFVIT---- : 357
TaPIN6 : IAS--IAIGMHCTLLHIAVVQAALPLAVTSFVFAKEYNVPEILSTAVIFGMLIAVEAATAYYFVIT---- : 432
TaPIN7 : IGS--IAVGLRGDVLRLVAIIQAALPQSITSFIFFAKEYGLHADVLSAVIFGMLVSLPILLGLYIVLELIR : 377
TaPIN8 : AAS--AAVGLRCTLRLKVAIVQVTT-----HACQLKKEHACIHVKRCF-----FECMFS----- : 609
TaPIN9 : VSS--YAVGMRCTLLKVAIVQAALPQGI VPFVFAKEYNVPEILSTAVIFGMLIAVEAATAYYFVIT---- : 357
TaPIN10 : IAS--IAIGMHCTLLHIAVVQAALPLAVTSFVFAKEYNVPEILSTAVIFGMLIAVEAATAYYFVIT---- : 428
TaPIN11 : IGS--IAVGLRGDVLRLVAIIQAALPQSITSFIFFAKEYGLHADVLSAVIFGMLVSLPILLGLYIVLELIR : 368
TaPIN12 : AAS--AAVGLRCTLRLKVAIVQAALPQGI VPFVFAKEYNVPEILSTAVIFGMLIALPITITAYYALLGLVH : 590
TaPIN13 : ISS--YAVGMRCTLLKVAIVQAALPQGI VPFVFAKEYNVPEILSTAVIFGMLIAVEAATAYYFVIT---- : 357
TaPIN14 : IAS--IAIGMHCTLLHIAVVQAALPLAVTSFVFAKEYNVPEILSTAVIFGMLIAVEAATAYYFVIT---- : 431
TaPIN15 : IGS--IAVGLRGDVLRLVAIIQAALPQSITSFIFFAKEYGLHADVLSAVIFGMLVSLPILLGLYIVLELIR : 378
TaPIN16 : AAS--IAVGLRGVLLHIAIVQAALPQGI VPFVFAKEYNVPEILSTAVIFGMLIALPITITVYYIILGL-- : 568
TaPIN17 : AAS--IAVGLRGVLLHIAIVQAALPQGI VPFVFAKEYNVPEILSTAVIFGMLIALPITITVYYIILGL-- : 566
TaPIN18 : AAS--IAVGLRGVLLHIAIVQAALPQGI VPFVFAKEYNVPEILSTAVIFGMLIALPITITVYYIILGL-- : 566
TaPIN19 : AGA--VALGLRGDVLRLIAIIQAALPQSITTFVFAKEYGLHADVLSAVIFGTIASLFLVLTYYIIVLGFVG : 365
TaPIN20 : IGA--LILGLRGDLLRVAILQAALPQSVGAFIFATEYDLHADVLSAVIFGTIASLFLVLTYYIIVLGLM- : 387
TaPIN21 : AGA--LILGLRGDLLRVITLQAALPQSVATFVFAKEYDLHADVLSAVIFGTIASLFLVLTYYIIVLGLM- : 357
TaPIN22 : AGA--VALGLRGDVLRLIAIIQAALPQSITTFVFAKEYGLHADVLSAVIFGTIASLFLVLTYYIIVLGFVG : 368
TaPIN23 : AGA--VALGLHGDVLRVITLQAALPQATTFVFAKEYGLHADVLSAVIFGTIASLFLVLTYYIIVLGFIE : 364
TaPIN24 : VGA--LILGLRGDLLRVAILQAALPQSVGAFIFATEYDLHADVLSAVIFGTIASLFLVLTYYIIVLGL- : 377
TaPIN25 : IGA--LILGLRGDLLRVAILQAALPQSIGTFIFATEYDLHADVLSAVIFGTIASLFLVLTYYIIVLGLM- : 387
TaPIN26 : AGA--VALGLRGDVLRLIAIIQAALPQSITTFVFAKEYGLHADVLSAVIFGTIASLFLVLTYYIIVLGFVG : 367
TaPIN27 : VGA--LILGLRGDLLRVAILQAALPQSVGAFIFATEYDLHADVLSAVIFGTIASLFLVLTYYIIVLGL- : 377
TaPIN28 : IGA--LILGLRGDLLRVAILQAALPQSIGTFIFATEYDLHADVLSAVIFGTIASLFLVLTYYIIVLGLM- : 387
TaPIN29 : AGA--LILGLRGDLLRVITLQAALPQSVATFVFAKEYDLHADVLSAVIFGTIASLFLVLTYYIIVLGLVI : 377
TaPIN30 : AAS--FAVGLRCTLRLHVAIVQAALPQGI VPFVFAKEYSVPEILSTAVIFGMLIALPITITVYYIILGL- : 588
TaPIN31 : NS-----GLGSSC----- : 521
TaPIN32 : AAS--FAVGLRCTLRLHVAIVQAALPQGI VPFVFAKEYSVPEILSTAVIFGMLIALPITITVYYIILGL- : 589
TaPIN33 : AAS--IAVGLRCTLRLHIAIVQAALPQGI VPFVFAKEYSVPEILSTAVIFGMLIALPITITVYYIILGL- : 587
TaPIN34 : AGA--AAVGLRGDVLRLFAIIQAALPQSIAFVFAKEYGLHADVLSAVIFGTIASLFLVLTYYIIVLGLIV : 367
TaPIN35 : ATS--IAVGLRGVLLHVAIVQAALPQGI VPFVFAKEYNCPQILSTAVIFGMLIALPITITVYYIILGL- : 632
TaPIN36 : AAS--IAVGLRCTLRLHIAIVQAALPQGI VPFVFAKEYSVPEILSTAVIFGMLIALPITITVYYIILGL- : 586
TaPIN37 : IAS--IAVGMHCTLLRLIAVVQAALPLAVASFVFAKEYNVPEILSTAVIFGMLIAVEAATAYYFVIT---- : 406
TaPIN38 : IAS--IYVGMHCTLLCIAVVQAALPLVVASFVFAKEYNVPEILSTAVIFGMLIAVEAATAYYFVIT---- : 393
TaPIN39 : IAS--FAIGMQCTLLRLIAVQAALPLSVISFVFAKEYNVPEILSTAVIFGMLIAVEAATAYYFVIT---- : 399
TaPIN40 : ATS--IAVGLRGVLLHVAIVQAALPQGI VPFVFAKEYNCPQILSTAVIFGMLIALPITITVYYIILGL- : 632
TaPIN41 : AAS--IAVGLRCTLRLHIAIVQAALPQGI VPFVFAKEYSVPEILSTAVIFGMLIALPITITVYYIILGL- : 586
TaPIN42 : AGAGAAVAFGLRGDVLRLFAIIQAALPQSIAFVFAKEYGLHADVLSAVIFGTIASLFLVLTYYIIVLGLIV : 380
TaPIN43 : -----FILHLAVV----- : 285
TaPIN44 : ATS--IAVGLRGVLLHVAIVQAALPQGI VPFVFAKEYNCPQILSTAVIFGMLIALPITITVYYIILGL- : 633

```

**Figure S7.** Alignment of the TaPINs protein sequences. The highly conserved regions of the TaPIN proteins were underlined with black color. Colored and shaded amino acids are chemically similar residues. Dashes indicate gaps introduced to maximize the alignment of homologous region.



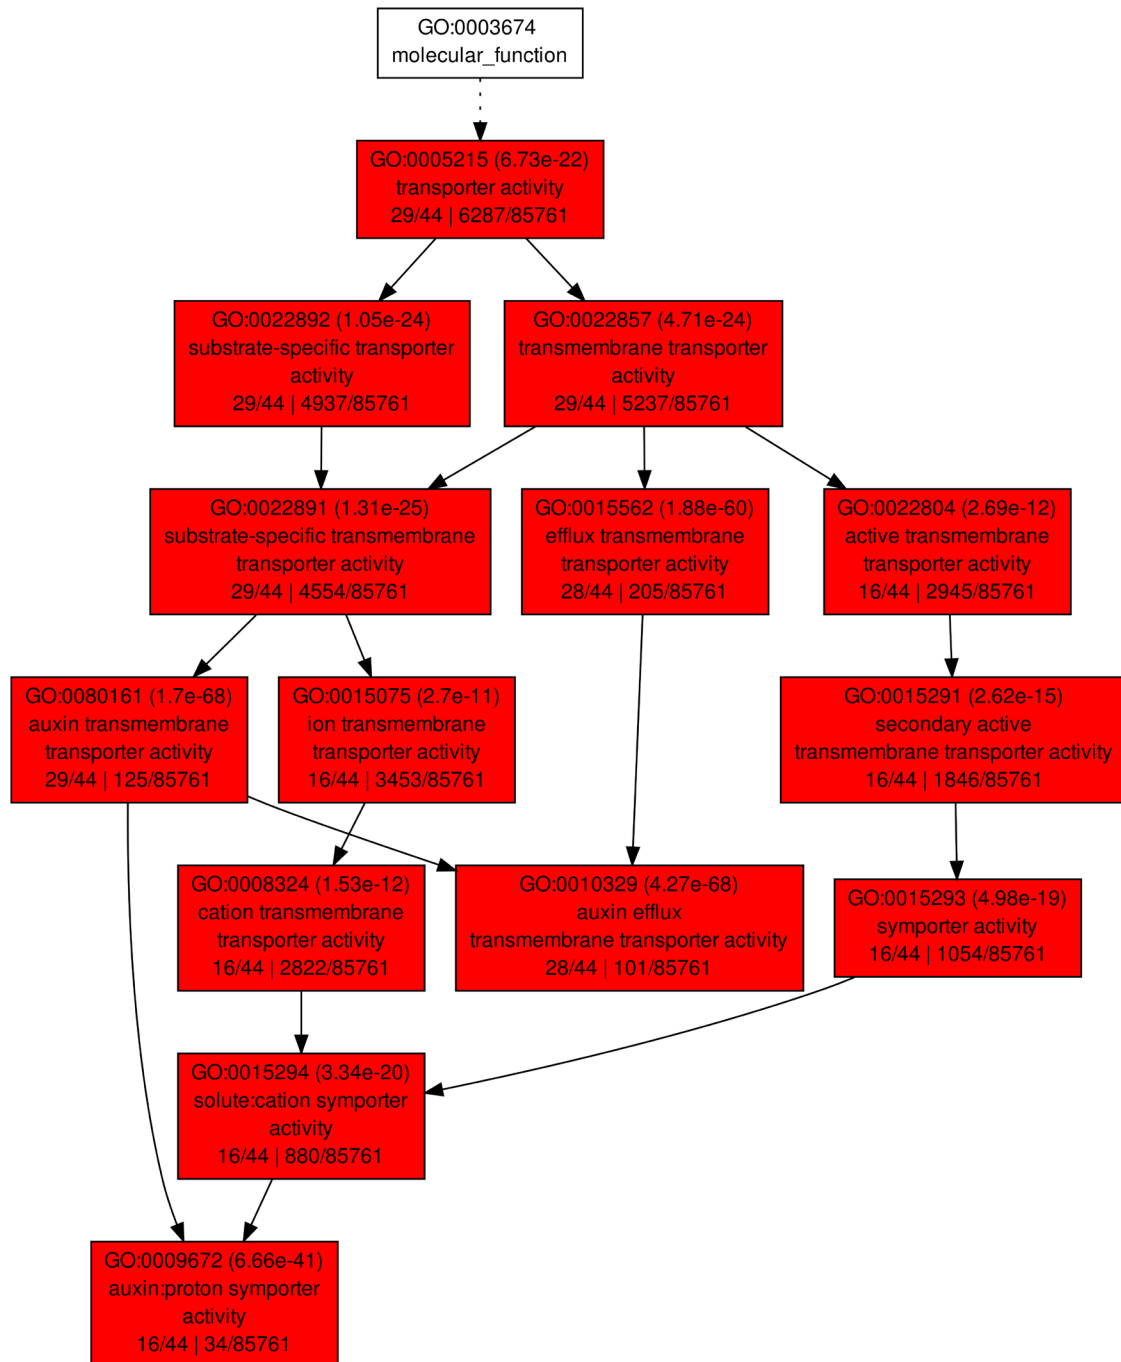

**Figure S8.** Gene ontology term distribution TaPIN gene family predicted using AgriGO  
**A.** Biological Process. **B.** Cellular component. **C.** Molecular function.

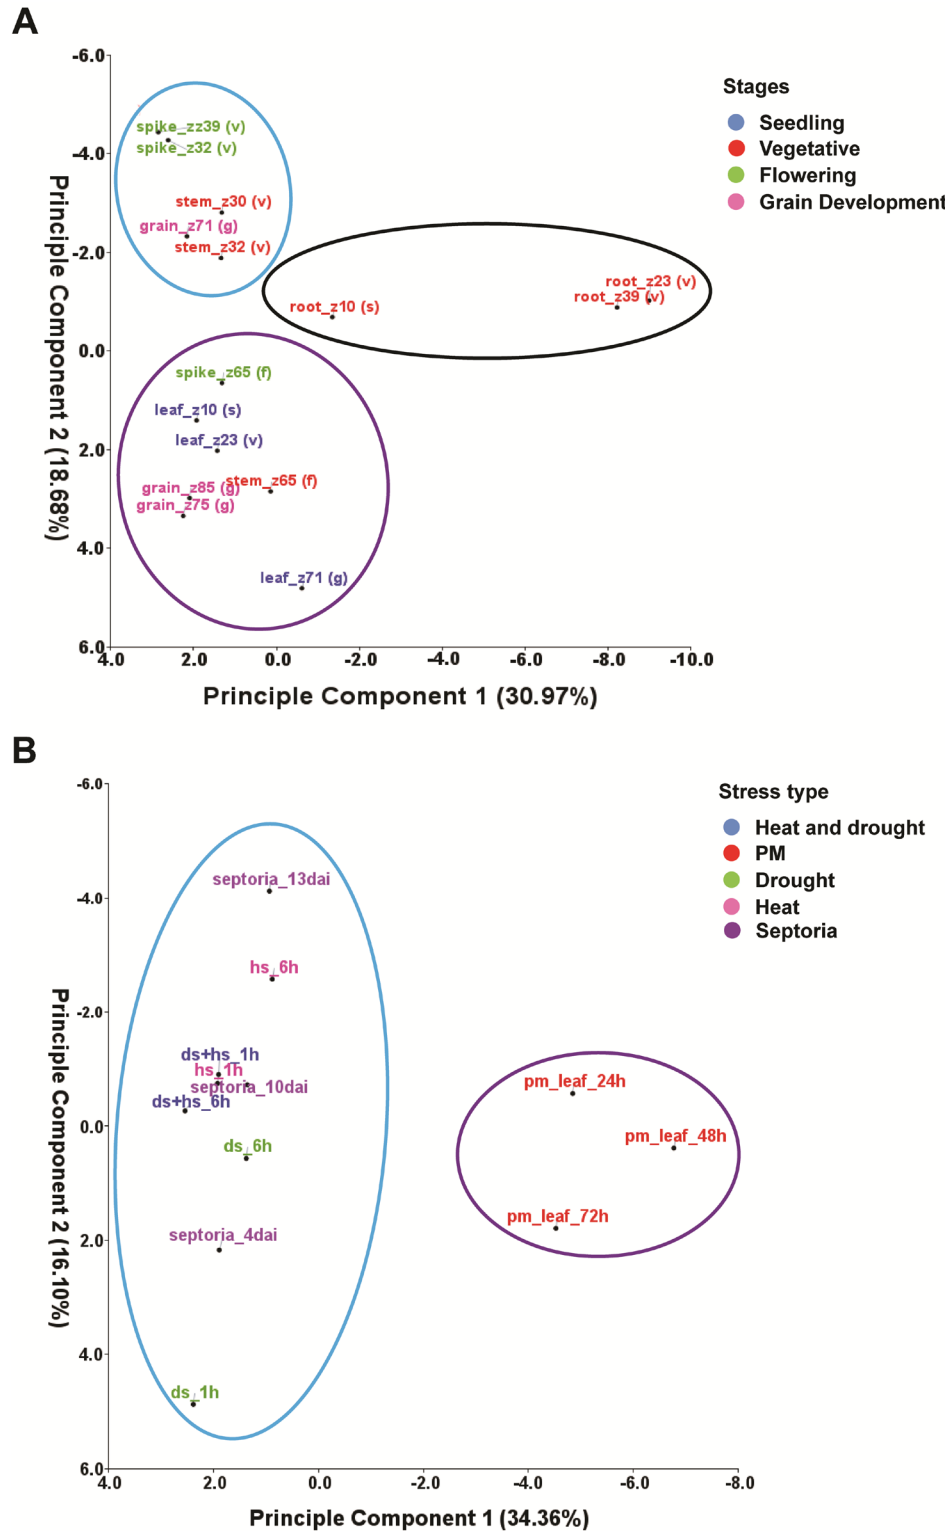

**Figure S9:** PCA plots displaying grouping of different (A) Developmental stages (B) Biotic and abiotic stress conditions based on the TaPIN expression pattern.

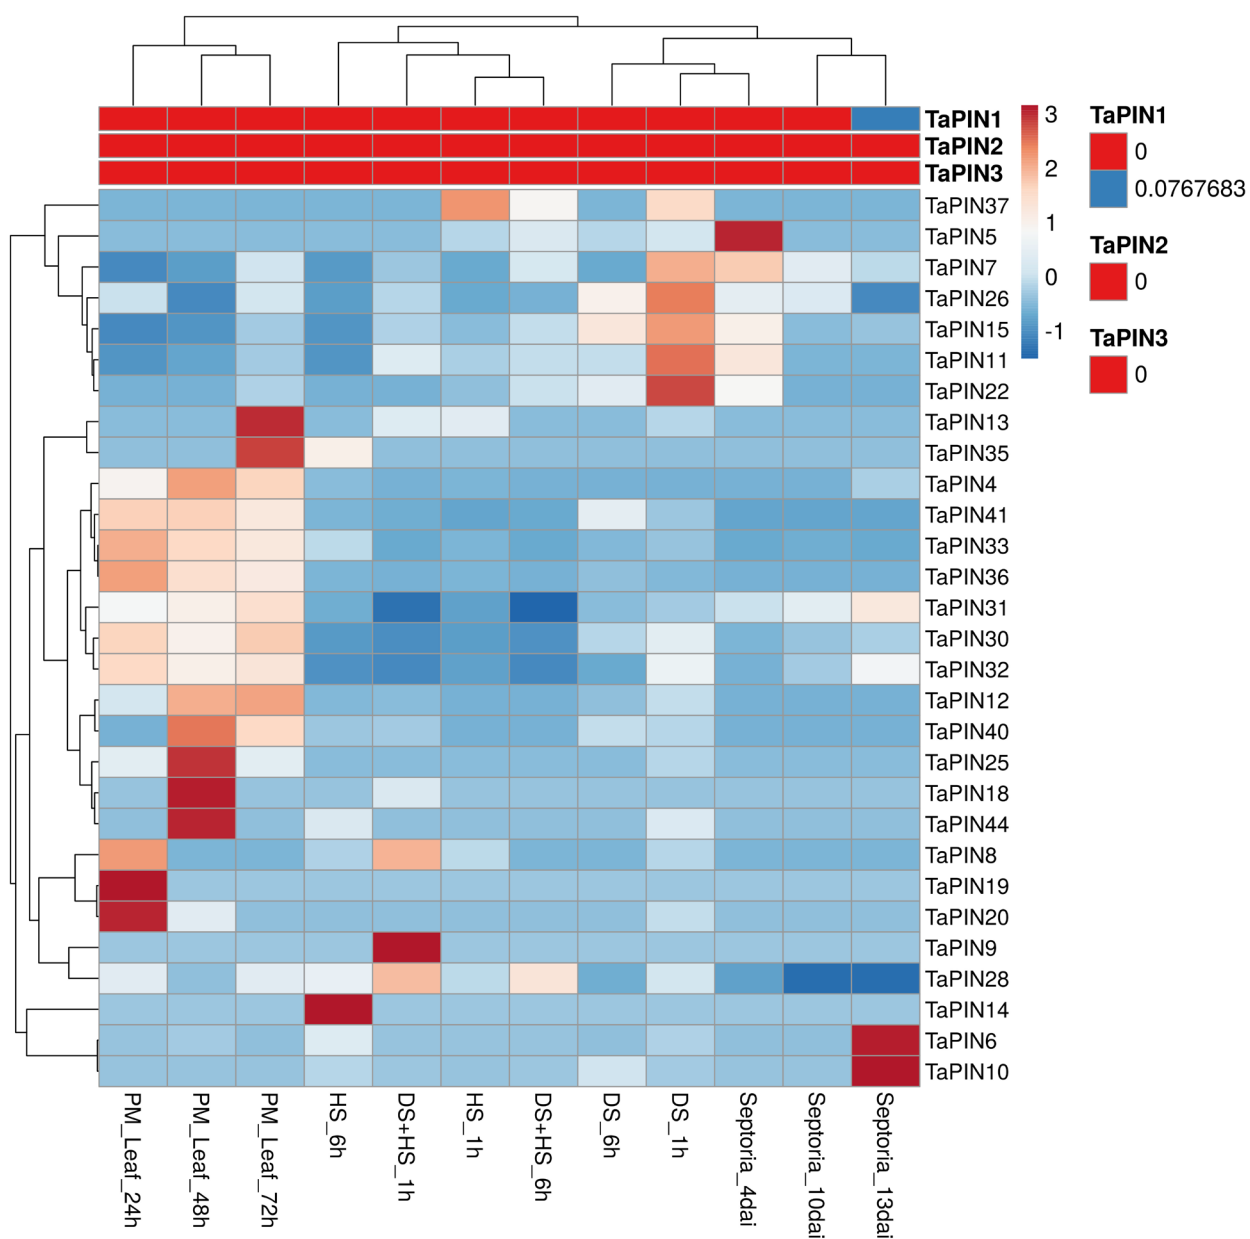

**Figure S10:** Heatmaps representing the expression pattern of TaPIN genes in different stress conditions. TPM values were directly used to construct the heatmaps. FPKM values were directly used to create the heatmaps. DS: Drought stress, HS: Heat stress, h: hour, d: days. PM: Powdery mildew.

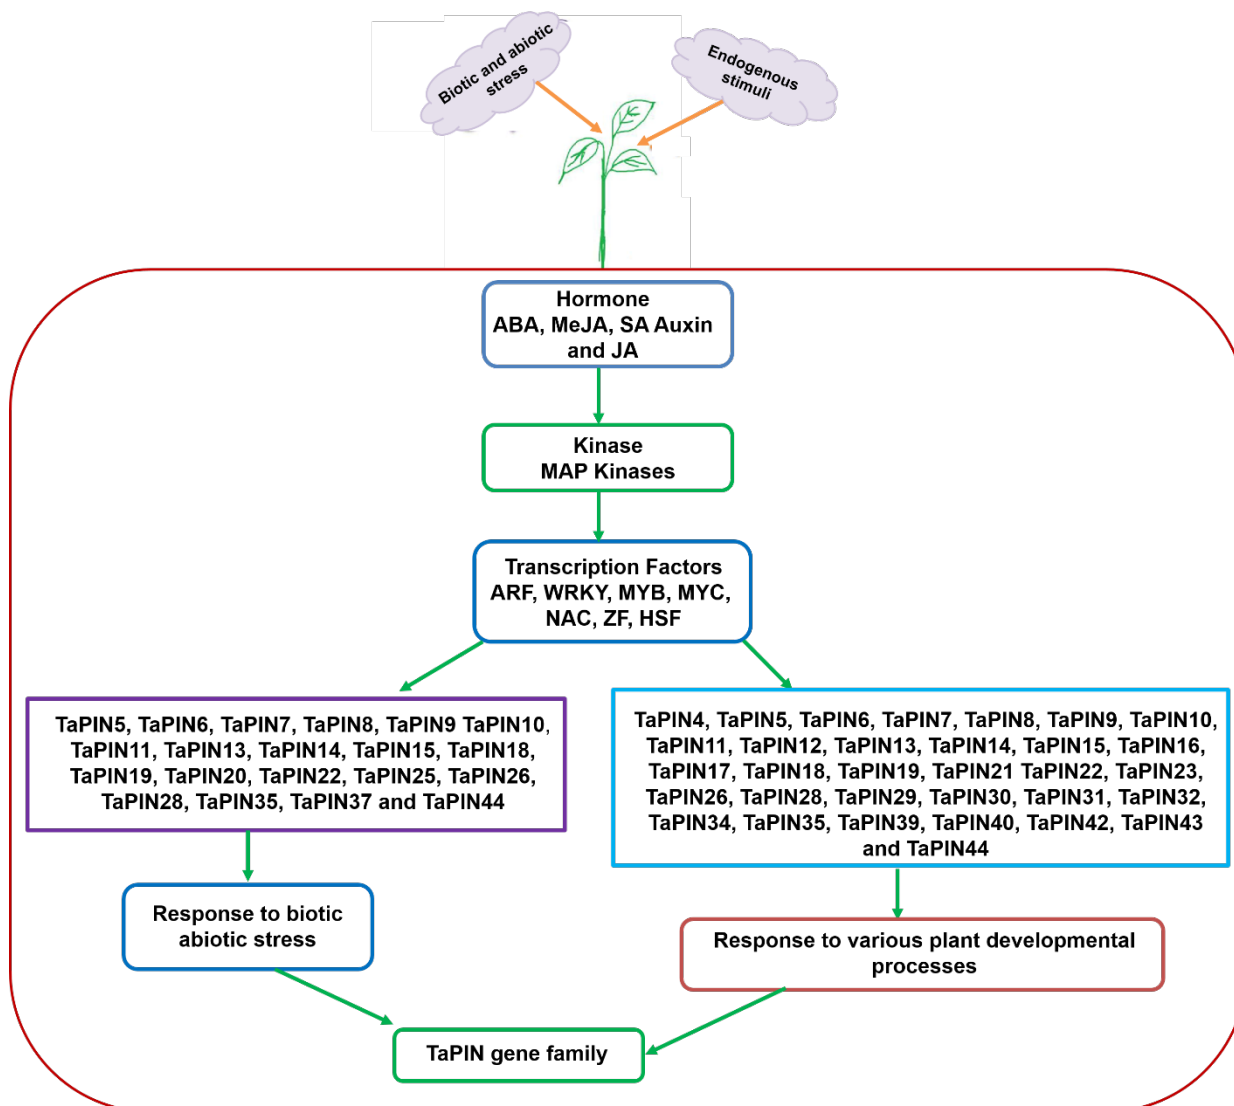

**Figure S11.** A possible function of TaPIN gene family in various plant developmental processes and diverse stress conditions. ABA: Absciscic acid; MeJA: Methyl jasmonate; SA: Salicylic acid; JA: Jasmonic acid; MAP: Mitogen-activated protein kinase; ARF: Auxin response factors; MYB: Myeloblastosis; NAC: No apical meristem; ZF: Zinc Finger and HSF: Heat shock factors.
