# Supplementary material for: Genome-Wide Identification and Characterization of PIN-FORMED (PIN) Gene Family Reveals Role in Developmental and Various Stress Conditions in Triticum aestivum L
Source: Int J Mol Sci. 2021 Jul 9;22(14):7396. doi: 10.3390/ijms22147396 (PMC8303626; doi:10.3390/ijms22147396)
Supplement: Supplementary file 1 [file ijms-22-07396-s001.zip]

Archive with 10 entries (10 files):
- Table S1.xls
- Table S2.xls
- Table S3.xls
- Table S4.xls
- Table S5.xls
- Table S6.xls
- Table S7.xls
- Table S8.xls
- Table S9.xls
- TaPIN supplmentary figures.pdf
