# Supplementary material for: Genome-Wide Identification and Characterization of PIN-FORMED (PIN) Gene Family Reveals Role in Developmental and Various Stress Conditions in Triticum aestivum L
Source: Int J Mol Sci. 2021 Jul 9;22(14):7396. doi: 10.3390/ijms22147396 (PMC8303626; doi:10.3390/ijms22147396)
Supplement: Supplementary file 1 [file ijms-22-07396-s001.zip › Table S1.xls]

## Sheet: Sheet1
Table S1. PIN proteins from Arabidopsis, rice and wheat used to generate phylogenetic tree.
Species	Gene ID	Gene Name	Protein sequences
A.thaliana	At1g73590	AtPIN1	MITAADFYHVMTAMVPLYVAMILAYGSVKWWKIFTPDQCSGINRFVALFAVPLLSFHFIAANNPYAMNLRFLAADSLQKVIVLSLLFLWCKLSRNGSLDWTITLFSLSTLPNTLVMGIPLLKGMYGNFSGDLMVQIVVLQCIIWYTLMLFLFEYRGAKLLISEQFPDTAGSIVSIHVDSDIMSLDGRQPLETEAEIKEDGKLHVTVRRSNASRSDIYSRRSQGLSATPRPSNLTNAEIYSLQSSRNPTPRGSSFNHTDFYSMMASGGGRNSNFGPGEAVFGSKGPTPRPSNYEEDGGPAKPTAAGTAAGAGRFHYQSGGSGGGGGAHYPAPNPGMFSPNTGGGGGTAAKGNAPVVGGKRQDGNGRDLHMFVWSSSASPVSDVFGGGGGNHHADYSTATN…
A.thaliana	At5g57090	AtPIN2	MITGKDMYDVLAAMVPLYVAMILAYGSVRWWGIFTPDQCSGINRFVAVFAVPLLSFHFISSNDPYAMNYHFLAADSLQKVVILAALFLWQAFSRRGSLEWMITLFSLSTLPNTLVMGIPLLRAMYGDFSGNLMVQIVVLQSIIWYTLMLFLFEFRGAKLLISEQFPETAGSITSFRVDSDVISLNGREPLQTDAEIGDDGKLHVVVRRSSAASSMISSFNKSHGGGLNSSMITPRASNLTGVEIYSVQSSREPTPRASSFNQTDFYAMFNASKAPSPRHGYTNSYGGAGAGPGGDVYSLQSSKGVTPRTSNFDEEVMKTAKKAGRGGRSMSGELYNNNSVPSYPPPNPMFTGSTSGASGVKKKESGGGGSGGGVGVGGQNKEMNMFVWSSSASPVSEAN…
A.thaliana	At1g70940	AtPIN3	MISWHDLYTVLTAVIPLYVAMILAYGSVRWWKIFSPDQCSGINRFVAIFAVPLLSFHFISTNNPYAMNLRFIAADTLQKIIMLSLLVLWANFTRSGSLEWSITIFSLSTLPNTLVMGIPLLIAMYGEYSGSLMVQIVVLQCIIWYTLLLFLFEFRGAKMLIMEQFPETAASIVSFKVESDVVSLDGHDFLETDAEIGDDGKLHVTVRKSNASRRSFCGPNMTPRPSNLTGAEIYSLSTTPRGSNFNHSDFYNMMGFPGGRLSNFGPADMYSVQSSRGPTPRPSNFEENCAMASSPRFGYYPGGGAGSYPAPNPEFSSTTTSTANKSVNKNPKDVNTNQQTTLPTGGKSNSHDAKELHMFVWSSNGSPVSDRAGLNVFGGAPDNDQGGRSDQGAKEIRML…
A.thaliana	At2g01420	AtPIN4	MITWHDLYTVLTAVVPLYVAMILAYGSVQWWKIFSPDQCSGINRFVAIFAVPLLSFHFISTNDPYAMNFRFVAADTLQKIIMLVLLALWANLTKNGSLEWMITIFSLSTLPNTLVMGIPLLIAMYGTYAGSLMVQVVVLQCIIWYTLLLFLFEYRGAKLLIMEQFPETGASIVSFKVESDVVSLDGHDFLETDAEIGNDGKLHVTVRKSNASRRSLMMTPRPSNLTGAEIYSLSSTPRGSNFNHSDFYSVMGFPGGRLSNFGPADLYSVQSSRGPTPRPSNFEENNAVKYGFYNNTNSSVPAAGSYPAPNPEFSTGTGVSTKPNKIPKENQQQLQEKDSKASHDAKELHMFVWSSSASPVSDVFGGGAGDNVATEQSEQGAKEIRMVVSDQPRKSNARG…
A.thaliana	At5g16530	AtPIN5	MINCGDVYKVIEAMVPLYVALILGYGSVKWWHIFTRDQCDAINRLVCYFTLPLFTIEFTAHVDPFNMNYRFIAADVLSKVIIVTVLALWAKYSNKGSYCWSITSFSLCTLTNSLVVGVPLAKAMYGQQAVDLVVQSSVFQAIVWLTLLLFVLEFRKAGFSSNNISDVQVDNINIESGKRETVVVGEKSFLEVMSLVWLKLATNPNCYSCILGIAWAFISNRWHLELPGILEGSILIMSKAGTGTAMFNMGIFMALQEKLIVCGTSLTVMGMVLKFIAGPAAMAIGSIVLGLHGDVLRVAIIQAALPQSITSFIFAKEYGLHADVLSTAVIFGMLVSLPVLVAYYAALEFIH
A.thaliana	At1g77110	AtPIN6	MITGNEFYTVMCAMAPLYFAMFVAYGSVKWCKIFTPAQCSGINRFVSVFAVPVLSFHFISQNNPYKMDTMFILADTLSKIFVFVLLSLWAVFFKAGGLDWLITLFSIATLPNTLVMGIPLLQAMYGDYTQTLMVQLVVLQCIIWYTLLLFLFELRAARLLIRAEFPGQAAGSIAKIQVDDDVISLDGMDPLRTETETDVNGRIRLRIRRSVSSVPDSVMSSSLCLTPRASNLSNAEIFSVNTPNNRFFHGGGGSGTLQFYNGSNEIMFCNGDLGGFGFTRPGLGASPRRLSGYASSDAYSLQPTPRASNFNELDVNGNGTPVWMKSPAAGRIYRQSSPKMMWESGQRHAAKDINGSVPEKEISFRDALKAAPQATAAGGGASMEEGAAGKDTTPVAAIG…
A.thaliana	At1g23080	AtPIN7	MITWHDLYTVLTAVIPLYVAMILAYGSVRWWKIFSPDQCSGINRFVAIFAVPLLSFHFISSNNPYAMNLRFIAADTLQKLIMLTLLIIWANFTRSGSLEWSITIFSLSTLPNTLVMGIPLLIAMYGEYSGSLMVQIVVLQCIIWYTLLLFLFEYRGAKILIMEQFPETGASIVSFKVESDVVSLDGHDFLETDAQIGDDGKLHVTVRKSNASRRSFYGGGGTNMTPRPSNLTGAEIYSLNTTPRGSNFNHSDFYSMMGFPGGRLSNFGPADMYSVQSSRGPTPRPSNFEESCAMASSPRFGYYPGGAPGSYPAPNPEFSTGNKTGSKAPKENHHHVGKSNSNDAKELHMFVWGSNGSPVSDRAGLQVDNGANEQVGKSDQGGAKEIRMLISDHTQNGEN…
A.thaliana	At5g15100	AtPIN8	MISWLDIYHVVSATVPLYVSMTLGFLSARHLKLFSPEQCAGINKFVAKFSIPLLSFQIISENNPFKMSPKLILSDILQKFLVVVVLAMVLRFWHPTGGRGGKLGWVITGLSISVLPNTLILGMPILSAIYGDEAASILEQIVVLQSLIWYTILLFLFELNAARALPSSGASLEHTGNDQEEANIEDEPKEEEDEEEVAIVRTRSVGTMKILLKAWRKLIINPNTYATLIGIIWATLHFRLGWNLPEMIDKSIHLLSDGGLGMAMFSLGLFMASQSSIIACGTKMAIITMLLKFVLGPALMIASAYCIRLKSTLFKVAILQAALPQGVVPFVFAKEYNLHPEIISTGVIFGMLIALPTTLAYYFLLDL
O.sativa	LOC_Os06g1261	OsPIN1a	MITGADFYHVMTAMVPLYVAMILAYGSVKWWRIFTPDQCSGINRFVALFAVPLLSFHFISTNNPYTMNLRFIAADTLQKLIVLALLTLWSHLSRRGSLEWTITLFSLSTLPNTLVMGIPLLKGMYGEFSGSLMVQIVVLQCIIWYTLMLFMFEYRGARILITEQFPDTAGAIASIVVDADVVSLDGRRDMIETEAEVKEDGKIHVTVRRSNASRSDVYSRRSMGFSSTTPRPSNLTNAEIYSLQSSRNPTPRGSSFNHTDFYSMVGRSSNFAAGDAFGVRTGATPRPSNYEEDAAAPNKAGSKYGQYPAPNPAMAAPPKPKKAANGQAKGEDGKDLHMFVWSSSASPVSDVFGNGAEYNDAAAVKEVRMAVASPRKADGVERDDFSFGNRGVAERDAEA…
O.sativa	LOC_Os02g50960	OsPIN1b	MITAADFYHVMTAMVPLYVAMILAYGSVKWWRIFTPDQCSGINRFVALFAVPLLSFHFISTNNPYTMNLRFIAADTLQKLMVLAMLTAWSHLSRRGSLEWTITLFSLSTLPNTLVMGIPLLKGMYGEFSGSLMVQIVVLQCIIWYTLMLFMFEYRGARMLITEQFPDTAANIASIVVDPDVVSLDGRRDAIETETEVKEDGRIHVTVRRSNASRSDIYSRRSMGFSSTTPRPSNLTNAEIYSLQSSRNPTPRGSSFNHTDFYSMVGRSSNFGAADAFGVRTGATPRPSNYEDDASKPKYPLPASNAAPMAGHYPAPNPAVSSAPKGAKKAATNGQAKGEDLHMFVWSSSASPVSDVFGGGAPDYNDAAAVKSPRKMDGAKDREDYVERDDFSFGNRGVM…
O.sativa	LOC_Os11g04190	OsPIN1c	MITVVDLYHVLTAVVPLYVAMTLAYASVRWWRIFSPDQCSGINRFVALFAVPLLSFHFISTNNPFAMNLRFLAADTLQKLIVLALLALWCRLSARGSLDWLITLFSLSTLPNTLVMGIPLLKGMYAAAADVDSGSLMVQIVVLQCIIWYTLMLFLFEYRGARLLVMEQFPDTAASIVSFRVDSDVVSLAGGGGGAAELQAEAEVGDDGRMRVTVRKSTSSRSEAACSHGTQSHSQSMQPRVSNLSGVEIYSLQSSRNPTPRGSSFNHAEFFNIVGNGKQGDEEKGAAGGGGHSPQPVVGKRKDLHMFVWSSSASPVSERAAAAAAGAVHVFGGGGADHGDAKGAQAYDEYSFGNKNEKDGPTLSKLGSNSTAQLRPKDDGEGMAAAMPPASVMTRLILI…
O.sativa	LOC_Os12g04000	OsPIN1d	MEQFPDTAASIVSFRVDSDVVSLAGGGGGAAELQAEAEVGDDGKMRVTVRKSTSSRSEAACSHGTQSHSQSMQPRVSNLSGVEIYSLQSSRNPTPRGSSFNHAEFFNIVGNGKHGDEEKGAAGGGGHSPQPVVGKRKDLHMFVWSSSASPVSERAAAAAAAGAVHVFGGGGADHGDAKGAQAYDEYSFGNKNEKDGPTLSKLGSNSTAQLRPKDDGEGRAAAMPPASVMTRLILIMVWRKLIRNPNTYSSLLGVIWSLVSYRWGIEMPAIIARSISILSDAGLGMAMFSLGLFMALQPRIIACGNSLASYAMAVRFLVGPAVMAAASIAVGLRGVLLHIAIVQAALPQGIVPFVFAKEYNVHPNILSTAVIFGMLIALPITLVYYILLGL
O.sativa	LOC_Os06g44970	OsPIN2	MITGRDIYDVLAAIVPLYVAMFLAYGSVRWWGIFTPDQCSGINRFVAVFAVPLLSFHFISTNDPYSMNYRFLAADSLQKLVILAALAVWHNLLSRYRRNGGAAASLDWTITLFSLSTLPNTLVMGIPLLRAMYGDFSGSLMVQIVVLQSVIWYTLMLFLFEYRGAKALISEQFPPDVGASIASFRVDSDVVSLNGREALQADAEVGRDGRVHVVIRRSASASTTGGGGGAARSGVSRAYGASNAMTPRASNLTGVEIYSLQTSREPTPRASSFNQADFYAMFSGSKMASQMASPMAQHGGAGGRAQGLDEQVTNKFASGKAADPPSYPAPNPGMMPAPRKKELGGSNSNSNKELHMFVWSSSASPVSEANLRNAVNHAASTDFASAPPPAAVPVGGATP…
O.sativa	LOC_Os01g69070	OsPIN5a	MIGWGDVYKVVAATVPLYFALFLGYGSVRWWRIFTREQCDAVNRLVAFFALPFFTFEFTLHTDPFQVNYRAVAADVISKAVIVAVIGAWARFMSKGGCAVSWSITSFSLSTLTNSLVVGVPMARAMYGEWAQQLVVQLSVFQAIVWLTLLLFVLEVRKAAIGMYVDGAEAAAAAGKDVEAAGAAAAAGTVVVAAAAGKPSLWALVKVVAHKLARNPNTYASFVGITWACLANRLHIALPSAFEGSVLIMSKSGTGMAMFSMGLFMAQQEKIIACGTSFAALGLVLKFALGPAAMAIGSIAVGLRGDVLRVAIIQAALPQSITSFIFAKEYGLHADVLSTAVIFGMLVSLPLLVGFYIVLELIR
O.sativa	LOC_Os08g4172	OsPIN5b	MAPLYFALGLGYGSVRWWRFFTAEQCAAINTMVVYFSMPFFTFDFVVRTDPFAMNYRVIAADAVSKAIAIAAMAAWARTRCGCAAAKAGAQSWSITGFSLAALNNTLVVGVPLLDAMYGRWAQDLVVQIAVVQSMVWFPLLLMAFELRKAWVVGGGGGVGPAVMSSSSPPEKQSDVEMNGAVVAAPGGGGGVRLPFWATARTVGLKLARNPNVYASVLGVVWACIAYRWHLSLPGIVTGSLQVMSRTGTGMSMFSMGLFMGQQERVIACGAGLTALGMALRFVAGPLATLVGAAALGLRGDVLHLAIIQAALPQSIASFVFAKEYGLHADVLSTAVIFGTLISLPILIAYYAVLGFV
O.sativa	LOC_Os09g32770	OsPIN5c	MAPLYFALGLGYGSVRWWRLFTADQCDAVNRLVACFAVPFFAFDFAARIDPFALSYRVLAADALSKLAVALALAACAAAASTRCCGSGGGKRGGGGGFSWCITGFSLATLNNTLVVGVPLLDAMYGKWARDLIVQISVVQTIVYFPLLLLAFEVRRATTAAAAPPPPPTGTDDDDVEDGAAAAATAAAARRSLWPLVRAVWLKVARNPNVYAGVLGVAWACVTNRWHVETPSIIEGSVLIMSKTGVGLSMFSMGLFMALQDKIIVCGAGLTVLGMALRFVAGPAATAVGAFALGLRGDLLRLAIIQAYTHLHEIHSPSSFFLLSPEICLNSNGCMHDTSPHDETARDEQAALPQSITTFVFAKEYGLHAEILSTAVIFGTLASLPVLIVYYIVLGFIR
O.sativa	LOC_Os01g51780	OsPIN8	MVSWKDIYLVLEATVPLYVAMILAYLSIKWWKLFTPEQCSGINKFVAKFSIPLLSFQVISTTDPYDMNIKLIYSDILQKSLALLGFAAISKACCAEKFDWLITGFSLSTLPNTLIVGIPLLKGMYGEQAGKLLSQIVVLQSLIWYTLLLFLFELRAANGMATTTSSETTGLIWALVGFRWHIRLPLIVSNSIRMLSDGGLGMAMFSLGLFTALQTKIIACGAKRMLLALAIRFFLGPALMGMSSYAIGMRGVLLKIAIVQAALPQGIVPFVFAKEYNVQADILSTAIIVGMMVAVPVALAYYFAMIIPAIK
O.sativa	LOC_Os01g58860	OsPIN9	MITGSEVYQVVEAMAPLYTAAALGYGSVRWLKAFSNEQCAGINHFVALYAVPVLIFDMVSTNNVYKMNGRLIAADTLQKAVLLLGLMAWALWERSRARGAGAKAKAAVSSPLQWVITCFSVASLPNTIIMGVPLLNGMYGPVSKDLMKQIVVMQFCIWYNVIIFLYEYMAARRSASAPPPASSEGSAKISPSSPVKAAAAAADTNGNAVAADRPQEVAVNIEITEMAASTARDGVSGETTAAAKEVSSGEVAPVEEEEASAPAPSMKHVIWMAVKKLLQIPNTYASFLGLIWSLIAFKCGFSMPKIVEDSLFTIRTTAVGLSMFSSGTFIARQSRFVPCGYKIASFSMVIKFLIGPVVMLFASLVIGMHGTLLHIAVVQAALPLAVTSFVYAEEYKVHA…
O.sativa	LOC_Os01g45550	OsPIN10a	MISGHDFYTVMAAVVPLYVAMFLAYGSVRWWGIFTPDQCSGINRFVAIFAVPLLSFHFISTNDPYAMNLRFLAADTLQKLLVLAGLAAWSRLPSRTGAPRLDWSITLFSLSTLPNTLVMGIPLLIAMYGPYSGSLMVQIVVLQCIIWYTLMLFLFEFRAARMLIADQFPDTAASIVSLHVDPDVVSLEGGHAETEAEVAADGRLHVTVRRSSVSRRSLLVTPRPSNLTGAEIYSLSSSRNPTPRGSNFNHADFFAMVGGGPPPPTPAAVRGSSFGASELYSLQSSRGPTPRQSNFDEHSARPPKPPATTTGALNHDAKELHMFVWSSSASPVSEVSGLPVFSGGGGGGALDVGAKEIHMVIPADLPQNNGSGKEHEEYGAVALGGGGGGENFSFGGGKT…
O.sativa	LOC_Os05g50140	OsPIN10b	MISWHELYMVLSAVVPLYVAMMVAYGSVRWWGVLTPEQCSGINRFVAVIAVPLLSFHFISSSDPYAMNLRFVAADTLQKVLVLAALAAWSRFPARFVPPAWPPLDCSITLFSVSTLPNTLVMGIPLLVSMYGPYSGDLMVQIVVLQSIVWYTLLLFLFEFRAARVLIAAQFPDTAASIAAVHVDPDVVSLEGSQAEAHAEVAPDGRLRMVVCRSSVSRRSAAAAATPRASNLTGVEIYSISSSRNATPRGSTFTLADIPGHQPPNSALRASSFGAADLFSLHSSSRQHTPRPSSFDEHAAARARASATVAPTNDLKDTHMIEWSSGASAASEVTGLPVFRSGRETRRLVPSDAPSIASSRVIRPPPGATGGERAASFNKAVGGQDELAKLEAGAKTEQQ…
T. aestivum	TraesCS1A02G415400	TaPIN1	MISWHDLYTVLTAMVPLYVAMILAYGSVRWWGVITADQCAGINRFVAVFAVPLLSFKVISGSNLYAMDLRFAAADTLQKLLVLASLAVWSRLPVPFAGLDWSITLFSSATMPNTLIMGIPLLVAMYGRHAGDLMVQIVVLQCIIWCTLLLFLFEFRAARLLISGRFPAAAVADVRVDPDVVSLDGSHAEAQAEVAPDGSMRVVVRRSAASLSRRSLLNGAAAGMPSPARESSVTGVEIFSVSSSRNHTPRGSSSFTHGDFSATTGGGGGAAAPALPPPPPPHGAVRASSFGAADLFSLHSSRQHTPRPSASYDEHAPRGRSTAAVAPVEDPKDNVHMFDWSSGASGASEVSGLPVLRSSAKESGRRRTPSDATSTNSDSSRLNRTGAAGVERVISEAAA…
T. aestivum	TraesCS1B02G445400	TaPIN2	MISWHDLYTVLTAMVPLYVAMILAYGSVRWWGVITADQCAGINRFVAVFAVPLLSFKVISGSNLYAMDLRFAAADTLQKLLVLASLAVWSRLPVPFAGLDWSITLFSSATMPNTLIMGIPLLVAMYGRHAGDLMVQIVVLQCIIWCTLLLFLFEFRAARLLISGRFPAAAVADVRVDPDVVSLDGSHAEAQAEVAPDGSMRVVVRRSAASVSRRSLHNGAAAGMSPPRGSNLTGMEIYSVSSSRNHTPRGSSSFTHGDFSATTGGGGGAAPALPPPPPPHGAVRASSFGAADLFSLHSSRQHTPRPSASYDEHAPRGRSAAAVAPVDDPKDNVHMFDWSSGASGASEVSGLPVFRSSTKESGRRRAPSDTTSINSDSSRSNRPGATGGERVKSEAATQE…
T. aestivum	TraesCS1D02G422900	TaPIN3	MISWHDLYTVLTAMVPLYVAMILAYGSVRWWGVITADQCAGINRFVAVFAVPLLSFKVISGSNLYAMDLRFAAADTLQKLLVLASLAVWSRLPVPFAGLDWSITVFSSATMPNTLIMGIPLLVAMYGRHAGDLMVQIVVLQCIIWCTLLLFLFEFRAARLLISGRFPAAAVADVRVDPDVVSLDGSHAEAQAEVAPDGSMRVVVRRSAASVSRRSLHNDAAAGMSPPRGSNLTGMEIYSVSSSRNHTPRGSSSFTHGDFSATTGGGGAAAPALPPPPPHGAVRASSFGAADLFSLHSSRQHTPRPSASYDEHAPRGRSAAAVAPVEDPKDNVHMFDWSSGASGASEVSGLPVFRSSAKESGRRRAPSDATSINSDSSRSNRPGATGGERVKSGAAAQES…
T. aestivum	TraesCS3A02G231500	TaPIN4	MISLHDLYTVLAAVVPLYVAMILAYGSVRWWGIFTPDQCSGINRFVAIFAVPLLSFHFISTNDPYEMNLRFLAADTLQKLLVLALLAVCSRLIPSRRAWVPRLDWSITLFSLSTLPNTLVMGIPLLIAMYGPYAGSLMVQIVVLQCIIWYTLLLFLFEFRAARLLIADQFPDTAASIVSLHVDPDVVSLEGGHAEAESEVAADGRLHVTVSRSSVSRRSTLLVTPRPSNLTGAEIYSLSSSQNPTPRGSNFNQADFFAVVGGAPPARVDGSSFGASEHYSLQSSQGPTPRESNLDEHSAAPKQAMTDAGAQHNHDAKELHMFVWSSSASPVSEVVSGLPVFSGGTGAAHLDAAAKEIRMVVPADPPQNGSCKENGSYTAAARGCRKAVEHDGDAVQAGP…
T. aestivum	TraesCS3A02G243700	TaPIN5	MISWVAIYHVLEATTPLYVAMILAYLSIKWWKLFTPEQCSGINKFVANFSIPLLSFQVISTNNPYDMNLKLIFADILQKSIALLGFAAISRACCAEKFDWLITGFSLSTLPNTLIVGIPLLKGMYGDEAVKLISQIVVLQSLIWYTLLLFLLEFRATKGIAAAPSSEIVDEEEAGTLGATQQTYQEGQSKGVSARCSRAFRFLLVIGMKLVMNPNIYACLIGLIWALISFRWQIQLPLIISNSIRILSDGGLGMAMFSLGLFTALQTKIIACGTKKMLLSLGIRFFLGPALMMISSYAVGMRGILLKVAIVQAALPQGVVPFVFAKEYNVHADILSTAIIVGMMVAVPATLAYYFVI
T. aestivum	TraesCS3A02G331300	TaPIN6	MITWLAVYHVVEAMAPLYTAAVLGYASVRWLKAFSEEQCAGINHFVAIYAVPVLIFNMVSTNNPYAMNGRLVAADTLQKAVMLLGLVAWAAWESRSRRRRRSDGGGKASAAVAAASPLQWVVTAFSVASLPNTIIMGVPLLGGMYGAMSKDLMKQIVVMQFCVWYNVVIFIYEYMAARRAATAMDGTAKISPGSPGAAPSAEKIAPNDEAVVAAKRAHEVTVNIEITEVAPASTAQKDLADNTTTTVAKETSADAEAEQGSPPPAKSTAPSVTHIALMAGKKVLKIPNTYASFLGLIWALIAFKCGIKMPKIIDDSLFTIQTTAVGLSMFASGTFIARQSRFVPSGYAIASMSMVLKFLIGPVVMLLASLAIGMHGTLLHIAVVQAALPLAVTSFVYAE…
T. aestivum	TraesCS3A02G426700	TaPIN7	MIGWGDVYKVVAATAPLYFALFLGYGSVRWWRIFTREQCDAVNRLVAFFALPFFTFEFTLHTDPFQVNYRAVAADVISKAVIVAVIAVWARLLGRNGNGKGAAGWSITGFSLSTLTNSLVVGVPMARAMYGEWAQQLVVQLSVFQAIVWLTLLLFVLEVRKAAIGMYVDVGRKNVVHDATMPESPVKADVEAAPTGAVAVLVVGGVEEVGGKPSVWRLVKTVAHKLARNPNTYASFVGITWACVANRLHMELPSVLENSVLIMSKSGTGMAMFSMGLFMAQQERILACGPGYAALGLALKFGLGPVAMAIGSIAVGLRGDVLRVAIIQAALPQSITSFIFAKEYGLHADVLSTAVIFGMLVSLPLLVGLYIVLELIR
T. aestivum	TraesCS3B02G260700	TaPIN8	MISLHDLYTVLAAVVPLYVAMILAYGSVRWWGIFTPDQCSGINRFVAIFAVPLLSFHFISTNDPYEMNLRFLAADTLQKFLVLALLAACSRLIPSRLDWSITLFSLSTLPNTLVMGIPLLVAMYGPYAGSLMVQIVVLQCIIWYTLLLFLFEFRAARMLIADQFPDTAASIVSLHVDPDVVSLEGGRAETESEVAADGRLHVTVRRSSVSRRSTLLVTPRPSNLTGAEIYSLSSSQNPTPRGSNFNQADFFAVVGGAPPARVGDSSFGASEHYSVQSSQRPTPRESNLEEHSAGPKQAMTDAGAQHNHDAKELHMFVWSSSAFPVSEVVSGLPVFSGGTDAAHLDAAAKEIRMVVPADPPQNGSCKDNGGYTAAARGGGKAVEDDGDAVQAGPDRPTAK…
T. aestivum	TraesCS3B02G276500	TaPIN9	MISWVAIYHVLEATTPLYVAMILAYLSIKWWKLFTPEQCSGINKFVANFSIPLLSFQVISTNNPYDMNLKLIFADILQKSIALLGFAAISRACCVEKFDWLITGFSLSTLPNTLIVGIPLLKGMYGDEAVKLISQIVVLQSLIWYTLLLFLLEFRAAKGIAAAPSSEIVDEEEAGTLGATQQTYQEGQSKGVSARCSRAFRFLLVIGMKLVMNPNIYACLIGLIWALISFRWQIQLPLIVSNSIRILSDGGLGMAMFSLGLFTALQTKIIACGTKKMLLSLGFRFFLGPALMMVSSYAVGMRGILLKVAIVQAALPQGVVPFVFAKEYNVHADILSTAIIVGMMVAVPAALAYYFVI
T. aestivum	TraesCS3B02G361500	TaPIN10	MITWLAVYHVVEAMAPLYTAAVLGYASVRWLKAFSEEQCAGINHFVAIYAVPVLIFNMVSTNNPYAMNGRLVAADTLQKAVMLLGLVAWAAWESRSRRRRRSNGGGKASTASPLQWVVTAFSVASLPNTIIMGVPLLGGMYGAMSKDLMKQIVVMQFCVWYNVVIFIYEYMAARRAATAMDGTAKISPGSPGAAPSAEKIAPNDEAVVAAKRAHEVTVNIEITEVAAASTAQKDLADNTTTTVAKETSTDAEAEKASPPPAKSTAPSVRHIGLMAGKKVLKIPNTYASFLGLIWALIAFKCGIKMPKIIDDSLFTIQTTAVGLSMFASGTFIARQSRFVPCGYAIASVSMVLKFLIGPVVMLLASLAIGMHGTLLHIAVVQAALPLAVTSFVYAEEYKV…
T. aestivum	TraesCS3B02G462900	TaPIN11	MIGWGDVYKVVAATAPLYFALFLGYGSVRWWRIFTREQCDAVNRLVAFFALPFFTFEFTLHTDPFQVNYRAVAADVISKAVIVAVIAVWARFLARNGNGKGAAGWSITGFSLSTLTNSLVVGVPMARAMYGEWAQQLVVQLSVFQAIVWLTLLLFVLEVRKAAIGMYVDVGKTSVVHDAAMPESPVKADVEAAPTGAEEVGGKPSVWRLVKTVAHKLARNPNTYASFVGITWACVANRLHMELPSVLENSVLIMSKSGTGMAMFSMGLFMAQQEKILACGPSYAALGLALKFGLGPVAMAIGSIAVGLRGDVLRVAIIQAALPQSITSFIFAKEYGLHADVLSTAVIFGMLVSLPLLVGLYIVLELIR
T. aestivum	TraesCS3D02G221900	TaPIN12	MISLHDLYTVLAAVVPLYVAMILAYGSVRWWGIFTPDQCSGINRFVAIFAVPLLSFHFISTNDPYEMNLRFLAADTLQKLLVLALLAACSRLIPSRLDWSITLFSLSTLPNTLVMGIPLLMAMYGPYAGSLMVQIVVLQCIIWYTLLLFLFEFRAARLLIADQFPDTAASIVSLHVDPDVVSLEGGRAETESEVAADGRLHVTVRRSSVSRRSTLLATPRPSNLTGAEIYSLSSSQNPTPRGSNFNQADFFAVVGGAPPARVGGSSFGASEHYSLQSSQGPTPRESNLDEHSAGPKHATTDAGAQHNHDAKELHMFVWSSSSSPVSEAVSGLPMFTGGAGAAHLDAAAKEIRMVVPADPPQNGSCKENGGYTAAARGGGKAVEDDGDAAVQAGPDRLAA…
T. aestivum	TraesCS3D02G247700	TaPIN13	MISWVAIYHVLEATTPLYVAMILAYLSIKWWKLFTPEQCSGINKFVANFSIPLLSFQVISTNNPYDMNLKLIFADILQKSIALLGFAAISRACCAEKFDWLITGFSLSTLPNTLIVGIPLLKGMYGDEAVKLISQIVVLQSLIWYTLLLFLLEFRAAKGIAAAPSSEIVDEEEAGTLGATQQTYQEGQSKGVSARCSRAFRFLLVIGMKLVMNPNIYACLIGLIWALISFRWQIQLPLIVSNSIRILSDGGLGMAMFSLGLFTALQTKIIACGTKKMLVSLGIRFFLGPALMMISSYAVGMRGILLKVAIVQAALPQGVVPFVFAKEYNVHADILSTAIIVGMMVAVPAALAYYFVI
T. aestivum	TraesCS3D02G324800	TaPIN14	MITWLAVYHVVEAMAPLYTAAVLGYASVRWLKAFSEEQCAGINHFVAIYAVPVLIFNMVSTNNPYAMNGRLVAADTLQKAVMLLGLVAWAAWESRSRRRRPSIGGGKASASAAAASPLQWVVTAFSVASLPNTIIMGVPLLGGMYGAMSKDLMKQIVVMQFCVWYNVVIFIYEYMAARRAATAMDGTAKISPGSPGAAPSAEKIAPNDEAIVAAKRAHEVTVNIEITEVAPASTVQKDLADNTTTTVAREMSTDAEEASPPPPAKSTAPSVTHIALMAGKKVLKIPNTYASFLGLIWALIAFKCGIKMPKIIDDSLFTIQTTAVGLSMFASGTFIARQSRFVPCGYAIASVSMVLKFLVGPVVMLLASLAIGMHGTLLHIAVVQAALPLAVTSFVYAEE…
T. aestivum	TraesCS3D02G421600	TaPIN15	MIGWGDVYKVVAATAPLYFALFLGYGSVRWWRIFTREQCDAVNRLVAFFALPFFTFEFTLHTDPFQVNYRAVAADVISKAVIVAVIAVWARLLGRNGGGKGAAGWSITGFSLSTLTNSLVVGVPMARAMYGEWAQQLVVQLSVFQAIVWLTFLLFVLEVRKAAIGMYVDVGRKNVVHDAAMPESPIKADVEAAAGGGAVAVLVVGGAEEVGGKPSVWRLVKTVAHKLARNPNTYASFVGITWACVANRLHMELPSVLENSVLIMSKSGTGMAMFSMGLFMAQQEKILACGPSYAALGLALKFGLGPVAMAIGSIAVGLRGDVLRVAIIQAALPQSITSFIFAKEYGLHADVLSTAVIFGMLVSLPLLIGLYIVLELIR
T. aestivum	TraesCS4A02G188100	TaPIN16	MITAADLYHVLTAVVPLYVAMTLAYGSVRWWRIFTPDQCSGINRFVALFAVPLLSFHFISSNDPFAMNLRFLAADTLQKLAVLALLVLWCRLRNGSLDWLITLFSLSTLPNTLVMGIPLLRGMYGPASAGTLMVQIVVLQCIIWYTLMLFLFEYRGAKMLVMEQFPDTAADIVSFRVDSDVVSLAAGGGADLQAEAEVGEDGRMRVTVRKSTSSRSEAACSHSHSHSHSQSMQPRVSNLSGVEIYSLQSSRNPTPRGSSFNHAEFFNIVGGAKGDEEKGSAGAGAGNGTGGHSPQPLPQALAGKRKDLHMFVWSSSASPVSERAAGGAMHVFGGGADHGDVLAKGAQAYDEYGRGGGDDFSFRNKNGGVANVDGPTLAKLGSNSTAQLHPKDDGEERAA…
T. aestivum	TraesCS4B02G130100	TaPIN17	MITAADLYHVLTAVVPLYVAMTLAYGSVRWWRIFTPDQCSGINRFVALFAVPLLSFHFISSNDPFAMNLRFLAADTLQKLAVLALLGLWCRLRNGSLDWLITLFSLSTLPNTLVMGIPLLRGMYGPASAGTLMVQIVVLQCIIWYTLMLFLFEYRGAKMLVMEQFPDTAADIVSFRVDSDVVSLAAGGGADLQAEAEVGEDGRMRVTVRKSTSSRSEAACSHSHSHSHSQSMQPRVSNLSGVEIYSLQSSRNPTPRGSSFNHAEFFNIVGGAKGDEEKGSAGAGNGTGGHSPQPLPQALAGKRKDLHMFVWSSSASPVSERAAGGAMHVFGGGADHGDVLAKGAQAYDEYGRGGGDDFSFRNKNGGVANVDGPTLAKLGSNSTAQLHPKDDGEERAAAM…
T. aestivum	TraesCS4D02G125300	TaPIN18	MITAADLYHVLTAVVPLYVAMTLAYGSVRWWRIFTPDQCSGINRFVALFAVPLLSFHFISSNDPFAMNLRFLAADTLQKLAVLALLGLWCRLRNGSLDWLITLFSLSTLPNTLVMGIPLLRGMYGPASAGTLMVQIVVLQCIIWYTLMLFLFEYRGAKMLVMEQFPDTAADIVSFRVDSDVVSLAAGGGADLQAEAEVGEDGRMRVTVRKSTSSRSEAACSHSHSHSHSQSMQPRVSNLSGVEIYSLQSSRNPTPRGSSFNHAEFFNIVGGAKGDEEKGSAGAGNGTGGHSPQPLPQALAGKRKDLHMFVWSSSASPVSERAAGGAMHVFGGGADHGDVLAKGAQAYDEYGRGGGDDFSFRNKNGGVANVDGPTLAKLGSNSTAQLHPKDDGEERAAAM…
T. aestivum	TraesCS5A02G284500	TaPIN19	MIGWGDVYKVVAAMAPLYFALGLGYGSVRWWKLFTPDQCDAVNRLVAYFAVPFFAFDFAARMDPYALNYRVLAADALSKLAVALALAAWAAASTRCCRAGAKRGGELASSWCITGFSLATLNNTLVVGVPLLDAMYGGWARDLVVQISVVQIIVYFPLLLLAFEARRACGGGAGKPDAAVAVSASDDDVEDGGAEGRRRREPVWPLVRAVWLKVARNPNVYAGVLGVAWSCVTNRWHIVTPSIIEGSVLIMSRTGVGLAMFSMGLFMALQEKIIVCGAGLTALGMALRFVAGPAATAAGAVALGLRGDVLRLAIIQAALPQSITTFVFAKEYGLHADVLSTAVIFGTLASLPVLIVYYIVLGFVG
T. aestivum	TraesCS5A02G285700	TaPIN20	MIGWGDVYKVVSAMAPLYFALGLGYASVRWWKFFTRDQCDAVNRLVIYFALPFFAFDFNAHAGTFAASYRVLAADAVAKLVVVLAVAGWVASCRWRQWSCAPKAPAARPARPGGGRGPSYSWCITGYSLGTLNNGLLVGVPLLDAMYGKWARDIVVQLSVVQAVVWLPLLLVVFEARQAWLEVTSAPAPDGAREEGDQAVPGSDDVDRPAAAGDGRKTAATGWAFWARLLRTVGLKVVGNPNVYASLLGVLWSSVANRWHLEMPGIIDGSISIMSRTGLGIGMFNMGLFIGLQDKLVVCGPGLTSLGMAMRFVAAPAATMIGALLLGLRGDLLRVAILQAALPQSIGTFIFAREYDLHANILSTAVIVGTLASLPVLATYYVVLGLM
T. aestivum	TraesCS5A02G286000	TaPIN21	MIGWGDVYRVAAAMAPLYFALGLGYGSVRWWKLFTPDHCDAVNRLVVYFAFPLFGFDFTARAGSFAAGYRVLAADAVAKLIVVLALAGCAAARRAKAATRRGGGSAPSSYSWCITGFSLAALNNGLLVGVPLLDAMYGKWARDVIVQLSVLQAVVWLPLMLVVFEARQAWLEVTPEPADQGAVAREEGDLQEAPGSDVHRPAAAGDGRKMAATGCAFWAPLLRAVGVKLARNPNVYASLLGVAWSFVANRWHLKMPSIIDGSIAIMSKTCIGMGMFSMGMFIGLQDKFIVCGLGLTALSLVLRFIVAPAATVAGALILGLRGDLLRVTILQAALPQSVATFVFSREYDLHAGVLSTA
T. aestivum	TraesCS5B02G283500	TaPIN22	MIGWGDVYKVVAAMAPLYFALGLGYGSVRWWKLFTPDQCDAVNRLVAYFAVPFFAFDFAARMDPYALNYRVLAADALSKLAVALALAAWAAASTRCCRGGAKRGGGGGELASSWCITGFSLATLNNTLVVGVPLLDAMYGGWARDLVVQISVVQIIVYFPLLLLAFEVRRACGGGAGKPDAAAAVSASEDDVEDGGAEGRRRREPVWPLVRAVWLKVARNPNVYAGVLGVAWSCVTNRWHIVTPSIIEGSVLIMSRTGVGLAMFSMGLFMALQEKIIVCGAGLTALGMALRFVAGPAATAAGAVALGLRGDVLRLAIIQAALPQSITTFVFAKEYGLHADVLSTAVIFGTLASLPVLIVYYIVLGFVG
T. aestivum	TraesCS5B02G283600	TaPIN23	MIRWGDVYKVVAAMAPIYFALGLGYGSVRWWKLFTPDQCDAVNRLVAYFAVPFFALDFAARMDPYALNYRVLAADALSKLAVALALAAWAAASTHCCRGGGKRGGELASSWCITGFSLATLTNTLVVGVPLLDAMYGGWARDLVVQISVVQIIVYFPLLLLAFEARRAWGGGPGKPGAEAALASDGDVEDGGAEDSRQRQPVWPLVRAVWLKVARNPNVYAGMLGVAWSCITNRWHIETPSIIEGSVLIMSRTGLGLCMFSMGQFMALQERVVACGAQLTAVGMALRFLVGPAATAAGAVALGLHGDVLRVTIIQAALPQAITTFVFAREYGLHADVLSTAVIFGTLMSLPVLIVYYIALPFIE
T. aestivum	TraesCS5B02G284900	TaPIN24	MIGWGDVYKVVSAMAPLYFALGLGYASVRWWKFFTRDQCDAVNRLVIYFALPFFAFDFNAHAGTFAAGYRVLAADAVAKLVVVLALAGWVAYCRWRHWIRAPKAPPASSAWPGPSWSWCITGYSLGTLNNGLFVGVPLLDAMYGKWARDIVVQLSVLQAVVWLPLLVVVFEARQAWLEATSAPARDGGAREEGDQAALGSDDGDGRKTATTGCAFWARLLRTVGVKVGGNPNVYASLLGVLWSSVANRWHLEMPDIIDGSISIMSRTGLGIGMFNTGLFIGLQDKLVVCRPGLTALGMAMRFVAAPAATAVGALLLGLRGDLLRVAILQAALPQSVGAFIFALEYDLHADVLSTVVIVGTLASLPVIITYYIVLGLL
T. aestivum	TraesCS5B02G285000	TaPIN25	MIGWGDVYKVVSAMSPLYFALGLGYASVRWWKFFTRDQCDAVNRLVIYFALPFFAFDFNAHAGTFAASYRVLAADAVAKLVVVLAVAGWVASCRWRRWSRAPKAPPARPARPGGGRGPSYSWCITGYSLGTLNNGLLVGVPLLDAMYGKWARDIVVQLSVVQAVVWLPLLLVAFEARQAWLEVTSAPAPDGAREEGDQAAPGSDDVDRPAAAGEDRKMAATGWAFWAPLLRTVGLKVVGNPNVYASLLGVLWSSVANRWHLEMPGIIDGSISIMSRTGLGIGMFNMGLFIGLQDKLVVCGPGLTSLGMAMRFVAAPAATMIGALLLGLRGDLLRVAILQAALPQSIGTFIFAREYDLHANILSTAVIVGTLASLPVLATYYVVLGLM
T. aestivum	TraesCS5D02G291800	TaPIN26	MIGWGDVYKVVAAMAPLYFALGLGYGSVRWWKLFTPDQCDAVNRLVAYFAVPFFAFDFAARMDPYKLNYRVLAADALSKLAVALVLAAWAATSTRCSRGGAKRGGGGGELASSWCITGFSLATLNNTLVVGVPLLDAMYGGWARDLVVQISVVQIIVYFPLLLLAFEVRRACGGGAGKPDAAAVSASEDDVEDGGAEGRRRRQPVWPLVRAVWLKVARNPNVYAGVLGVAWSCVTNRWHIVTPSIIEGSVLIMSRTGVGLAMFSMGLFMALQEKIIVCGAGLTALGMALRFVAGPAATAAGAVALGLRGDVLRLAIIQAALPQSITTFVFAKEYGLHADVLSTAVIFGTLASLPVLIVYYIVLGFVG
T. aestivum	TraesCS5D02G293000	TaPIN27	MIGWGDVYKVVSAMAPLYFALGLGYASVRWWKFFTRDQCDAVNRLVIYFALPFFAFDFNAHAGTFAAGYRVLAADAVAKLVVVLALGGWVAYCRWRHWIRGPKAPPASSAWPGPSWSWCITGYSLGTLNNGLFVGVPLLDAMYGKWARDIVVQLSVLQAVVWLPLLLVVFEARQAWLEVTSAPAPDGGAREEGDQAALGSDDGDGRKTAATGCAFWARLLRTVGLKVGGNPNVYASLLGVLWSSVANRWHLEMPGIVDGSISIMSRTGLGIGMFNTGLFIGLQDKLVVCRPGLTMLGMAMRFVAAPAATAVGALLLGLRGDLLRVAILQAALPQSVGAFIFALEYDLHADVLSTVVIVGTLASLPVIITYYIVLGLL
T. aestivum	TraesCS5D02G293100	TaPIN28	MIGWGDVYKVVSAMAPLYFALGLGYTSVRWWKFFTRDQCDAVNRLVIYFALPFFAFDFNAHAGTFAASYRVLAADAVAKLVVVLAVAGWVASCRWRHLSRALKTPPARPARPDGGRGHSYSWCITGYSLGTLNNGLLVGVPLLDAMYGKWARDIVVQLSVVQAVVWLPLLLVAFEARQAWLEVTSAPAPDGAREEGEQAAPGSDDVDRPAAAGDGRKTAATGWAFWAPLLRTVGLKVVGNPNVYASLLGVLWSSVANRWHLEMPGIIDGSISIMSRTGLGIGMFNMGLFIGLQDKLVVCGPGLTSLGMAMRFVAAPAATMIGALLLGLRGDLVRVAILQAALPQSIGTFIFAREYDLHANILSTVVIVGTLASLPILATYYVVLGLM
T. aestivum	TraesCS5D02G293300	TaPIN29	MIGWGDVYRVAAAMAPLYFALGLGYGSVRWWKLFTPDHCDAVNRLVVYFAFPLFGFDFTARAGSFAAGYRVLAADAVAKLIVVLALAGCAAARRAKAATRRGGGGAPSSYSWCITGFSLAALNNGLLVGVSLLDAMYGKWARDVIVQLSVLQSVVWLPLMLVVFEARQAWLEVTPEPADQGAREEGDQEAPGSDVHRPAASRDGRKTAATGCAFWAPLLRAVGVKLARNPNVYASLLGVAWSSVANRWHLKMPSIIDGSIAIMSKTCIGMGMFSMGMFIGLQDKFIVCGLGLTVLSLGLRFIVAPAATVAGALILGLRGDLLRVTILQAALPQSVATFVFSREYDLHAGVLSTAVIVSTLASLPVLTAYYLVLGLVI
T. aestivum	TraesCS6A02G308600	TaPIN30	MITGTDFYHVMTAVVPLYVAMILAYGSVKWWGIFTPDQCSGINRFVALFAVPLLSFHFISTNNPYTMNLRFIAADTLQKLMMLAMLTAWSHLSRRGSLEWTITLFSLSTLPNTLVMGIPLLKGMYGDFSGSLMVQIVVLQCIIWYTLMLFMFEYRGARMLITEQFPDTAGAIASIVVDPDVVSLDGRSNAIETEAEVKEDGKIHVTVRRSSASRSDIYSRRSMGFSSTTPRPSNLTNAEIYSLQSSRNPTPRGSSFNHTDFYSMVGRSSNFGAADAYGIRTGATPRPSNYEEDAPKPKHPAPGAGHYPAPNPAVAAAPKGPKKPAANGQAKGEDLHMFVWSSSASPVSDVFGGGAPDYNDAAAAKSPRKMDGAKERDDYNVERDDFSFGNRGALDRDAE…
T. aestivum	TraesCS6B02G337300	TaPIN31	MITGTDFYHVMTAVVPLYVAMILAYGSVKWWGIFTPDQCSGINRFVALFAVPLLSFHFISTNNPYTMNLRFIAADTLQKLMMLAMLTAWSHLSRRGSLEWTITLFSLSTLPNTLVMGIPLLKGMYGDFSGSLMVQIVVLQCIIWYTLMLFMFEYRGARMLITEQFPDTAGAIASIVVDPDVVSLDGRSNAIETEAEVKEDGKIHVTVRRSSASRSDIYSRRSMGFSSTTPRPSNLTNAEIYSLQSSRNPTPRGSSFNHTDFYSMVGRSSNFGAADAYGIRTGATPRPSNYEEDAPKPKHPAPGAGHYPAPNPAVAAAPKGPKKPATNGQAKGEDLHMFVWSSSASPVSDVFGGGAPDYNDAAAAKSPRKSMDGAKEREDYNVERDDFSFGNRGALDRDT…
T. aestivum	TraesCS6D02G287800	TaPIN32	MITGTDFYHVMTAVVPLYVAMILAYGSVKWWGIFTPDQCSGINRFVALFAVPLLSFHFISTNNPYTMNLRFIAADTLQKLMMLAMLTAWSHLSRRGSLEWTITLFSLSTLPNTLVMGIPLLKGMYGDFSGSLMVQIVVLQCIIWYTLMLFMFEYRGARMLITEQFPDTAGAIASIVVDPDVVSLDGRSNAIETEAEVKEDGKIHVTVRRSSASRSDIYSRRSMGFSSTTPRPSNLTNAEIYSLQSSRNPTPRGSSFNHTDFYSMVGRSSNFGAADAYGVRTGATPRPSNYEEDAPKPKHPAPGAGHYPAPNPAVAAAPKGPKKPAANGQAKGEDLHMFVWSSSASPVSDVFGGGAPDYNDAAAAKSPRKMDGAKERDDYNVERDDFSFGNRGALERDAE…
T. aestivum	TraesCS7A02G190600	TaPIN33	MITGTDFYHVMTAMVPLYVAMMLAYGSVKWWRIFTPDQCSGINRFVALFAVPLLSFHFISTNNPYTMNLRFIAADTLQKLIVLALLTLWSHLSRNGSLEWTITLFSLSTLPNTLVMGIPLLKGMYGDESGSLMVQIVVLQCIIWYTLMLFMFEYRGARILITEQFPDTAGAIASIAVDPDVMSLDGRRDMIETEAEVKEDGKIHVTVRRSNASRSDIYSRRSMGFSSTTPRPSNLTNAEIYSLQSSRNPTPRGSSFNHTDFYSMVGRSSNFAAGDAFGPVVRTGATPRPSNYEEDKAGNNNNNSKYGQYPAPNPAMAAPQKPAKKAANGQAKGEDGKDLHMFVWSSSASPVSDVFGNGTEAYNDAAAKDVRVAAASPRKADGVERDEFSFGNKERDAEA…
T. aestivum	TraesCS7A02G258800	TaPIN34	MIALGDIYKVVEAMAPLYFALGLGYGSVRWWRFFTAEQCDAINTLVVCFSMPFFTFDFVVRADPYAMNYRVIAADAVAKLLAVLAAAVWARCAKAKAGAYSWSITGFSLGAYNNTLVVGVPLLDAMYGKWAQDLIVQIAVVQAIVWFPLLLLAFELRKAWVVGGASSLSATTARDDGSTTSDDDRAQHVEMDVEAAPPTGGRRIRLWPMASTVGMKLARNPNVYASVLGVAWACIAYRWRIGMPGVVTGSLQVMSRTGTGMSMFSMGLFMAQQERIVACGGGLAALGMVLRFVAGPLAALAGAAAFGLRGDVLRFAIIQAGLPQSIASFVFAKEYGLHADVLSTAVIFGTLVSLPVLIGYYGVLDIV
T. aestivum	TraesCS7A02G492400	TaPIN35	MITGKDIYDVLAAVVPLYVAMFMAYGSVRWWGIFTPDQCSGINRFVAVFAVPLLSFHFISTNDPYAMDYRFLAADSLQKLVILAALAVWHNVLSRYRCRGGTEAGEASSLDWTITLFSLATLPNTLVMGIPLLRAMYGDFSGSLMVQIVVLQSVIWYTLMLFLFEYRGAKALISEQFPPDVGASIASFRVDSDVVSLNGREALHADAEVGRDGRVHVVIRRSASGSTTGGHGAGRSGIYRGASNAMTPRASNLTGVEIYSLQTSREPTPRQSSFNQSDFYSMFNGSKLASPKGQPPVAGTPGARGQGLDEQVANKFKGGEAAAPYPAPNPGMMMPAPRKKELGGSNSNSNKELHMFVWSSSASPVSEANLRNAVNHAASTDFAAAPPAAATPRDGATPR…
T. aestivum	TraesCS7B02G095500	TaPIN36	MITGTDFYHVMTAMVPLYVAMMLAYGSVKWWRIFTPDQCSGINRFVALFAVPLLSFHFISTNNPYTMNLRFIAADTLQKLIVLALLTLWSHLSRNGSLEWTITLFSLSTLPNTLVMGIPLLKGMYGDESGSLMVQIVVLQCIIWYTLMLFMFEYRGARILITEQFPDTAGAIASIAVDPDVMSLDGRRDMIETEAEVKEDGKIHVTVRRSNASRSDIYSRRSMGFSSTTPRPSNLTNAEIYSLQSSRNPTPRGSSFNHTDFYSMVGRSSNFAAGDAFGPVVRTGATPRPSNYEEDKAGNNNNSKYGQYPAPNPAMAAPQKPAKKAANGQAKGEDGKDLHMFVWSSSASPVSDVFGNGTEAYNDAAAKDVRVAAASPRKADGVERDEFSFGNKERDAEAG…
T. aestivum	TraesCS7B02G331500	TaPIN37	MITGSGVYHAVETMAPLYTAAALGYASVRWLGAFSEEQCAGINHFVATYALPALVFDMVSTNDPYAMNARLVAADTLQKRAMLLGLLAWAAWPSSRCRGERLSGRNSALRWVVTAFSVAQLPSIIIMGVPLLSGMYGPASKDLMKQIVVMQFCLWYNVVIFMYEYMAATDGSTKASLGLPEKRAIAAVERVHQVTVNVESTEHTRQQGMAVAGQQATAALTTEVCAGEDDESAEAEDDSLPASPSMRHIAFMTGKKVLRIPNSYASFLGLVWALITFKCGIKMPKIILDSLFTIQTTTIGLSMFSSGTFMARQPQFIPCGYAIAMVSLVLKFLIGPVAMLLASLAVGMHGTLLRIAVVQAALPLAVASFVYAEEYKVHAEIMSTGVILGILISFPVTIV…
T. aestivum	TraesCS7B02G359200	TaPIN38	MITGSGVYHVVETMAPLYTAAALGYASVRWLKAFSEEQCAGINHFVATYALPALVFDMVSTNDPYAMNVRLVAADTLQKGAMLLGLMAWAAWPSSRCRGEKPGGGGGGGCNVAVSPLQWVVTAFSVAQLPSTIIMGVPLLGGMYGPASKDLMKQIVVMQFCLWYNVVIFMYEYMAATDGSTKAGPGSPEKRAIAAVERAHQVTVNVESTEHTRQQGMAVAGQQAAAALTTEVCAGEDDEGAEAEDDSLPASPSMRHIAFMTGKKVLRIPNTYASFLGLVWALITFKCGIKMPKIILDSLLTIQTTTIGLSMFSSGTLMAPQPQFIPCGYAIAMVSLVLKFLIGPVAILLASLVVGMHGTLLCIAVVQAALPLVVASFVYAEEYKVHADIMSTG
T. aestivum	TraesCS7B02G359300	TaPIN39	MITGSAVYQVVEAMAPLYTAAALGYASVRWLKAFSEEQCAGINRFVATYAMPALIFDMVSTNDPYAMNGRLVAADTLQKGFMLLGLVAWAAWSSPRRRDTSAGNGKVAASPLQWVVTAFSMAQLPSTIVMGVPLLGALYGPTSKDLMKQIVVMQLCVWYNVVIFMYEYMAAKDGSTKVGPAPASPENVESTEVQAAQQGMAAASQTTSTAVVGEASPTHGADAEVAEAEDVALPPPPSMSHVAFVTGKKVLKIPNTYATFLGLFWALIAFKCRIKMPKIIVDSLFTIQTTTVGLSMFSSGTFMARQPRFIPCGYVIALVSMILKFLIGPMAMLLASFAIGMQGTLLRIAVIQAALPLSVISFVYAKEYKVHADIMSTGVILGIFILLPVTIVYYILLEL
T. aestivum	TraesCS7B02G398100	TaPIN40	MITGKDIYDVLAAVVPLYVAMFMAYGSVRWWGIFTPDQCSGINRFVAVFAVPLLSFHFISTNDPYAMDYRFLAADSLQKLVILAALAVWHNVLSRYRCRGGTEAGEASSLDWTITLFSLATLPNTLVMGIPLLRAMYGDFSGSLMVQIVVLQSVIWYTLMLFLFEYRGAKALISEQFPPDVGASIASFRVDSDVVSLNGREALHADAEVGRDGRVHVVIRRSASGSTTGGHGAGRSGIYRGASNAMTPRASNLTGVEIYSLQTSREPTPRQSSFNQSDFYSMFNGSKLASPKGQPPVAGGGGARGQGLDEQVANKFKGGEAAAPYPAPNPGMMMPAPRKKELGGSNSNSNKELHMFVWSSSASPVSEANLRNAVNHAASTDFAAAPPAAATPRDGATPR…
T. aestivum	TraesCS7D02G191600	TaPIN41	MITGTDFYHVMTAMVPLYVAMMLAYGSVKWWRIFTPDQCSGINRFVALFAVPLLSFHFISTNNPYTMNLRFIAADTLQKLIVLALLTLWSHLSRNGSLEWTITLFSLSTLPNTLVMGIPLLKGMYGDESGSLMVQIVVLQCIIWYTLMLFMFEYRGARILITEQFPDTAGAIASIAVDPDVMSLDGRRDMIETEAEVKEDGKIHVTVRRSNASRSDIYSRRSMGFSSTTPRPSNLTNAEIYSLQSSRNPTPRGSSFNHTDFYSMVGRSSNFAAGDAFGPVVRTGATPRPSNYEEDKAGGNNNSKYGQYPAPNPAMAAPQKPSKKAANGQAKGEDGKDLHMFVWSSSASPVSDVFGNGTEAYNDAAAKDVRVAAASPRKADGVERDEFSFGNKERDAEAG…
T. aestivum	TraesCS7D02G259700	TaPIN42	MIALGDIYKVVEAMAPLYFALGLGYGSVRWWRFFTAEQCGAINTLGVCFSMPFFTFDFVVRADPYAMNYRVIAADAVTKLLAVLAAAVWARCAKAKAGAYSWSITGFSLGAYNNTLVVGVPLLDAMYGKWAQDLIVQIAVVQAIVWFPLLLLAFELRKAWVVGGGVSSLSATMAHDDGSTSSDDDRARRVEPVSHSDVEVDLDVEAAPPTGGRRIRLWLMASTVGMKLARNPNVYASVLGVAWACIAYRWRIGMPGIVTGSLQVMSRTGTGMSMFSMGLFMAQQERIVACGGGLAALGMVLRFVAGPLAALAGAGAVAFGLRGDVLRFVIIQAALPQSIASFVFAKEYGLHADVLSTAVIFGTLVSLPVLIGYYGVLGIV
T. aestivum	TraesCS7D02G446900	TaPIN43	MITGSAVYQVVEAMAPLYTAAALGYASVRWLKAFSEEQCAGINRFVATYAMPALIFDMVSTSDPYAMNGRLVAADTLQKGVMLLGLVAWAVRSSLRRRETSAGNVAASPLQWVVTAFSMAQLPSTIIMGVPILGALYGPTSKDFMKQIVVMQLCVWYNVIIFMYEYMAAKDGSIKVGPAPASPENVGSTEVAAAQPGMAVASQTTSTAVVGEVSPTHAADAEVAEAEDVALPAPPSMSHVAFVTGKKILKIPNTHAAFLGLFWALIAFKQVPSFQSSFILHLAVV
T. aestivum	TraesCS7D02G478800	TaPIN44	MITGKDIYDVLAAVVPLYVAMFMAYGSVRWWGIFTPDQCSGINRFVAVFAVPLLSFHFISTNDPYAMDYRFLAADSLQKLVILAALAVWHNVLSRYRCRGGTEAGEASSLDWTITLFSLATLPNTLVMGIPLLRAMYGDFSGSLMVQIVVLQSVIWYTLMLFLFEYRGAKALISEQFPPDVGASIASFRVDSDVVSLNGREALHADAEVGRDGRVHVVIRRSASGSTTGGHGAGRSGIYRGASNAMTPRASNLTGVEIYSLQTSREPTPRQSSFNQSDFYSMFNGSKLASPKGQPPVAGGGGARGQGLDEQVANKFKGGEAAAPYPAPNPGMMMPAPRRKKELGGSNSNSNKELHMFVWSSSASPVSEANLRNAVNHAASTDFAAAPPAAATPRDGATP…
