# Supplementary material for: Genome-Wide Identification and Characterization of PIN-FORMED (PIN) Gene Family Reveals Role in Developmental and Various Stress Conditions in Triticum aestivum L
Source: Int J Mol Sci. 2021 Jul 9;22(14):7396. doi: 10.3390/ijms22147396 (PMC8303626; doi:10.3390/ijms22147396)
Supplement: Supplementary file 1 [file ijms-22-07396-s001.zip › Table S2.xls]

## Sheet: Sheet1
Table S2. Ratio of Ka/Ks and distribution of duplicate wheat PIN genes.
Duplicated TaPIN gene pairs	Identity (%)	Ka	Ks	Ka_Ks	Duplication time (Mya)	Duplication type	Types of selection
TaPIN25/TaPIN28	66	0.0178509	0.107078	0.166709	8.23677	WGD or segmental	Purify selection
TaPIN24/TaPIN27	98	0.0134232	0.0580825	0.231105	4.46789	WGD or segmental	Purify selection
TaPIN21/TaPIN29	100	0.0116244	0.0706623	0.164506	5.43556	WGD or segmental	Purify selection
TaPIN22/TaPIN26	49	0.00753066	0.0552768	0.136235	4.25206	WGD or segmental	Purify selection
TaPIN34/TaPIN42	100	0.020592	0.105861	0.194518	8.14319	WGD or segmental	Purify selection
TaPIN7/TaPIN15	66	0.0151276	0.0725802	0.208426	5.58309	WGD or segmental	Purify selection
TaPIN9/TaPIN13	37	0.00498341	0.034666	0.143755	2.66661	WGD or segmental	Purify selection
TaPIN6/TaPIN10	78	0.011128	0.111345	0.0999416	8.565	WGD or segmental	Purify selection
TaPIN37/TaPIN38	99	0.0373632	0.0516065	0.724002	3.96973	WGD or segmental	Purify selection
TaPIN39/TaPIN43	99	0.108736	1.67532	0.0649046	128.871	WGD or segmental	Purify selection
TaPIN1/TaPIN2	49	0.0209046	0.0628072	0.332837	4.83133	WGD or segmental	Purify selection
TaPIN8/TaPIN12	63	0.05575	0.07581	0.735391	5.83154	WGD or segmental	Purify selection
TaPIN17/TaPIN18	75	0.0015829	0.0701276	0.0225718	5.39443	WGD or segmental	Purify selection
TaPIN30/TaPIN32	63	0.00227388	0.051422	0.0442199	3.95554	WGD or segmental	Purify selection
TaPIN36/TaPIN41	35	0.00227445	0.0351352	0.0647342	2.70271	WGD or segmental	Purify selection
