# Supplementary material for: Genome-Wide Identification and Characterization of PIN-FORMED (PIN) Gene Family Reveals Role in Developmental and Various Stress Conditions in Triticum aestivum L
Source: Int J Mol Sci. 2021 Jul 9;22(14):7396. doi: 10.3390/ijms22147396 (PMC8303626; doi:10.3390/ijms22147396)
Supplement: Supplementary file 1 [file ijms-22-07396-s001.zip › Table S3.xls]

## Sheet: Sheet1
Table S3. Orthologous relationships of TaPIN genes with other PIN genes in B. distachyon, Ae. tauschii, T. dicoccoides, O. sativa and A. thaliana.
T. aestivum (AABBDD)		B. distachyon (BB)
Chromosome	Gene name	Chromosome	Gene ID
1A	TaPIN1	2	BRADI_2g15610v3
3A	TaPIN4	2	BRADI_2g44987v3
3A	TaPIN5	2	BRADI_2g48170v3
3A	TaPIN6	2	BRADI_2g52640v3
3A	TaPIN7	2	BRADI_2g58917v3
4A	TaPIN16	4	BRADI_4g26300v3
5A	TaPIN19	4	BRADI_4g34510v3
6A	TaPIN30	3	BRADI_3g59520v3
7A	TaPIN33	1	BRADI_1g45020v3
7A	TaPIN34	3	BRADI_3g41080v3
7A	TaPIN35	1	BRADI_1g31530v3
1B	TaPIN2	2	BRADI_2g15610v3
3B	TaPIN8	2	BRADI_2g44987v3
3B	TaPIN9	2	BRADI_2g48170v3
3B	TaPIN10	2	BRADI_2g52640v3
3B	TaPIN11	2	BRADI_2g58917v3
4B	TaPIN17	4	BRADI_4g26300v3
5B	TaPIN22	4	BRADI_4g34510v3
5B	TaPIN23	4	BRADI_4g34510v3
7B	TaPIN36	1	BRADI_1g45020v3
7B	TaPIN37	2	BRADI_2g52640v3
7B	TaPIN38	2	BRADI_2g52640v3
7B	TaPIN39	2	BRADI_2g52640v3
7B	TaPIN40	1	BRADI_1g31530v3
1D	TaPIN3	2	BRADI_2g15610v3
1D	TaPIN3	2	BRADI_2g15610v3
1D	TaPIN3	2	BRADI_2g15610v3
3D	TaPIN12	2	BRADI_2g44987v3
3D	TaPIN13	2	BRADI_2g48170v3
3D	TaPIN14	2	BRADI_2g52640v3
3D	TaPIN15	2	BRADI_2g58917v3
4D	TaPIN18	4	BRADI_4g26300v3
5D	TaPIN26	4	BRADI_4g34510v3
6D	TaPIN32	3	BRADI_3g59520v3
7D	TaPIN41	1	BRADI_1g45020v3
7D	TaPIN42	3	BRADI_3g41080v3
7D	TaPIN43	2	BRADI_2g52640v3
7D	TaPIN44	1	BRADI_1g31530v3
T. aestivum (AABBDD)		Ae. tauschii (DD)
Chromosome	Gene name	Chromosome	Gene ID
1A	TaPIN1	1D	AET1Gv20987500
3A	TaPIN4	3D	AET3Gv20567200
3A	TaPIN5	3D	AET3Gv20604000
3A	TaPIN6	3D	AET3Gv20752600
3A	TaPIN7	3D	AET3Gv20948900
4A	TaPIN16	4D	AET4Gv20268800
5A	TaPIN19	5D	AET5Gv20662500
7A	TaPIN33	7D	AET7Gv20486200
7A	TaPIN34	7D	AET7Gv20634200
7A	TaPIN35	7D	AET7Gv21198200
1B	TaPIN2	1D	AET1Gv20987500
3B	TaPIN8	3D	AET3Gv20567200
3B	TaPIN9	3D	AET3Gv20604000
3B	TaPIN10	3D	AET3Gv20752600
3B	TaPIN11	3D	AET3Gv20948900
4B	TaPIN17	4D	AET4Gv20268800
5B	TaPIN22	5D	AET5Gv20662500
7B	TaPIN36	7D	AET7Gv20486200
7B	TaPIN39	7D	AET7Gv21123700
7B	TaPIN40	7D	AET7Gv21198200
1D	TaPIN3	1D	AET1Gv20987500
3D	TaPIN12	3D	AET3Gv20567200
3D	TaPIN13	3D	AET3Gv20604000
3D	TaPIN14	3D	AET3Gv20752600
3D	TaPIN15	3D	AET3Gv20948900
4D	TaPIN18	4D	AET4Gv20268800
5D	TaPIN26	5D	AET5Gv20662500
7D	TaPIN41	7D	AET7Gv20486200
7D	TaPIN42	7D	AET7Gv20634200
7D	TaPIN43	7D	AET7Gv21123700
7D	TaPIN44	7D	AET7Gv21198200
T. aestivum (AABBDD)		T. dicoccoides (AABB)
Chromosome	Gene name	Chromosome	Gene ID
1A	TaPIN1	1A	TRIDC1AG061110
1A	TaPIN1	1B	TRIDC1BG070060
3A	TaPIN4	3A	TRIDC3AG034630
3A	TaPIN4	3B	TRIDC3BG039030
3A	TaPIN5	3A	TRIDC3AG036380
3A	TaPIN5	3B	TRIDC3BG041540
3A	TaPIN6	3A	TRIDC3AG047710
3A	TaPIN6	3B	TRIDC3BG053840
3A	TaPIN7	3A	TRIDC3AG060400
3A	TaPIN7	3B	TRIDC3BG068270
4A	TaPIN16	4A	TRIDC4AG030030
4A	TaPIN16	4B	TRIDC4BG020520
5A	TaPIN19	5A	TRIDC5AG042570
5A	TaPIN19	5B	TRIDC5BG046500
5A	TaPIN20	5A	TRIDC5AG042850
6A	TaPIN30	6A	TRIDC6AG046430
7A	TaPIN33	7B	TRIDC7BG014240
7A	TaPIN34	7A	TRIDC7AG033510
7A	TaPIN34	7B	TRIDC7BG024700
7A	TaPIN35	7A	TRIDC7AG068670
7A	TaPIN35	7B	TRIDC7BG062770
1B	TaPIN2	1B	TRIDC1BG070060
1B	TaPIN2	1A	TRIDC1AG061110
3B	TaPIN8	3B	TRIDC3BG039030
3B	TaPIN8	3A	TRIDC3AG034630
3B	TaPIN9	3B	TRIDC3BG041540
3B	TaPIN9	3A	TRIDC3AG036380
3B	TaPIN10	3B	TRIDC3BG053840
3B	TaPIN10	3A	TRIDC3AG047710
3B	TaPIN11	3B	TRIDC3BG068270
3B	TaPIN11	3A	TRIDC3AG060400
4B	TaPIN17	4B	TRIDC4BG020520
4B	TaPIN17	4A	TRIDC4AG030030
5B	TaPIN22	5B	TRIDC5BG046500
5B	TaPIN22	5A	TRIDC5AG042570
5B	TaPIN24	5B	TRIDC5BG046670
5B	TaPIN25	5A	TRIDC5AG042850
6B	TaPIN31	6B	TRIDC6BG054110
7B	TaPIN36	7B	TRIDC7BG014240
7B	TaPIN37	7B	TRIDC7BG053050
7B	TaPIN39	7B	TRIDC7BG057520
7B	TaPIN39	7A	TRIDC7AG063800
7B	TaPIN40	7B	TRIDC7BG062770
7B	TaPIN40	7A	TRIDC7AG068670
1D	TaPIN3	1B	TRIDC1BG070060
1D	TaPIN3	1A	TRIDC1AG061110
3D	TaPIN12	3B	TRIDC3BG039030
3D	TaPIN12	3A	TRIDC3AG034630
3D	TaPIN13	3B	TRIDC3BG041540
3D	TaPIN13	3A	TRIDC3AG036380
3D	TaPIN14	3A	TRIDC3AG047710
3D	TaPIN14	3B	TRIDC3BG053840
3D	TaPIN15	3A	TRIDC3AG060400
3D	TaPIN15	3B	TRIDC3BG068270
4D	TaPIN18	4B	TRIDC4BG020520
4D	TaPIN18	4A	TRIDC4AG030030
5D	TaPIN26	5B	TRIDC5BG046500
5D	TaPIN26	5A	TRIDC5AG042570
5D	TaPIN27	5B	TRIDC5BG046670
5D	TaPIN28	5A	TRIDC5AG042850
6D	TaPIN32	6A	TRIDC6AG046430
7D	TaPIN41	7B	TRIDC7BG014240
7D	TaPIN42	7B	TRIDC7BG024700
7D	TaPIN42	7A	TRIDC7AG033510
7D	TaPIN43	7A	TRIDC7AG063800
7D	TaPIN43	7B	TRIDC7BG057520
7D	TaPIN44	7A	TRIDC7AG068670
7D	TaPIN44	7B	TRIDC7BG062770
T. aestivum (AABBDD)		O. sativa
Chromosome	Gene name	Chromosome	Gene ID
1A	TaPIN1	5	Os05g0576900
3A	TaPIN4	1	Os01g0643300
3A	TaPIN4	1	Os01g0643300
3A	TaPIN5	1	Os01g0715600
3A	TaPIN6	1	Os01g0802700
3A	TaPIN7	1	Os01g0919800
4A	TaPIN16	12	Os12g0133800
4A	TaPIN16	11	Os11g0137000
5A	TaPIN19	9	Os09g0505400
6A	TaPIN30	2	Os02g0743400
7A	TaPIN33	6	Os06g0232300
7A	TaPIN34	8	Os08g0529000
7A	TaPIN35	6	Os06g0660200
1B	TaPIN2	5	Os05g0576900
3B	TaPIN8	1	Os01g0643300
3B	TaPIN9	1	Os01g0715600
3B	TaPIN10	1	Os01g0802700
3B	TaPIN11	1	Os01g0919800
4B	TaPIN17	12	Os12g0133800
4B	TaPIN17	11	Os11g0137000
5B	TaPIN22	9	Os09g0505400
5B	TaPIN23	9	Os09g0505400
7B	TaPIN36	6	Os06g0232300
7B	TaPIN37	1	Os01g0802700
7B	TaPIN38	1	Os01g0802700
7B	TaPIN39	1	Os01g0802700
7B	TaPIN40	6	Os06g0660200
1D	TaPIN3	5	Os05g0576900
3D	TaPIN12	1	Os01g0643300
3D	TaPIN13	1	Os01g0715600
3D	TaPIN14	1	Os01g0802700
3D	TaPIN15	1	Os01g0919800
4D	TaPIN18	12	Os12g0133800
4D	TaPIN18	11	Os11g0137000
5D	TaPIN26	9	Os09g0505400
6D	TaPIN32	2	Os02g0743400
7D	TaPIN41	6	Os06g0232300
7D	TaPIN42	8	Os08g0529000
7D	TaPIN43	1	Os01g0802700
7D	TaPIN44	6	Os06g0660200
T. aestivum (AABBDD)		A. thaliana
Chromosome	Gene name	Chromosome	Gene ID
1A	TaPIN1	2	AT2G01420
1A	TaPIN1	1	AT1G70940
1A	TaPIN1	1	AT1G23080
3A	TaPIN4	2	AT2G01420
3A	TaPIN4	1	AT1G70940
3A	TaPIN4	1	AT1G23080
3A	TaPIN5	5	AT5G15100
3A	TaPIN7	5	AT5G16530
4A	TaPIN16	1	AT1G73590
5A	TaPIN19	5	AT5G16530
7A	TaPIN34	5	AT5G16530
7A	TaPIN35	5	AT5G57090
1B	TaPIN2	2	AT2G01420
1B	TaPIN2	1	AT1G70940
1B	TaPIN2	1	AT1G23080
3B	TaPIN8	1	AT1G70940
3B	TaPIN8	1	AT1G23080
3B	TaPIN8	2	AT2G01420
3B	TaPIN9	5	AT5G15100
3B	TaPIN11	5	AT5G16530
4B	TaPIN17	1	AT1G73590
5B	TaPIN22	5	AT5G16530
5B	TaPIN23	5	AT5G16530
7B	TaPIN40	5	AT5G57090
1D	TaPIN3	2	AT2G01420
1D	TaPIN3	1	AT1G70940
1D	TaPIN3	1	AT1G23080
3D	TaPIN12	2	AT2G01420
3D	TaPIN12	1	AT1G70940
3D	TaPIN12	1	AT1G23080
3D	TaPIN13	5	AT5G15100
3D	TaPIN15	5	AT5G16530
4D	TaPIN18	1	AT1G73590
5D	TaPIN26	5	AT5G16530
7D	TaPIN42	5	AT5G16530
7D	TaPIN44	5	AT5G57090
