# Supplementary material for: Genome-Wide Identification and Characterization of PIN-FORMED (PIN) Gene Family Reveals Role in Developmental and Various Stress Conditions in Triticum aestivum L
Source: Int J Mol Sci. 2021 Jul 9;22(14):7396. doi: 10.3390/ijms22147396 (PMC8303626; doi:10.3390/ijms22147396)
Supplement: Supplementary file 1 [file ijms-22-07396-s001.zip › Table S4.xls]

## Sheet: Sheet1
Table S4: Domain organization of TaPIN genes predicted using pfam with default parameters.
Protein name	aln start	aln-end	envelope start	envelope end	hmm-acc	hmm name	hmm start	hmm end	hmm length	bit score	evalue
TaPIN1	9	593	9	593	PF03547.18	Mem_trans	1	387	387	478.88	7.5e-144
TaPIN2	9	591	9	591	PF03547.18	Mem_trans	1	387	387	489.78	3.7e-147
TaPIN3	9	590	9	590	PF03547.18	Mem_trans	1	387	387	490.74	1.9e-147
TaPIN4	9	588	9	588	PF03547.18	Mem_trans	1	387	387	563.5	1.5e-169
TaPIN5	9	354	9	354	PF03547.18	Mem_trans	1	387	387	348.83	2.4e-104
TaPIN6	9	91	9	101	PF03547.18	Mem_trans	1	83	387	91.66	3.2e-26
TaPIN6	115	427	108	427	PF03547.18	Mem_trans	89	387	387	202.08	9e-60
TaPIN7	10	368	9	370	PF03547.18	Mem_trans	2	385	387	278.72	4.8e-83
TaPIN8	9	486	9	488	PF03547.18	Mem_trans	1	294	387	418.84	1.3e-125
TaPIN8	529	584	520	590	PF03547.18	Mem_trans	292	347	387	53.29	1.4e-14
TaPIN9	9	354	9	354	PF03547.18	Mem_trans	1	387	387	346.61	1.1e-103
TaPIN10	9	423	9	423	PF03547.18	Mem_trans	1	387	387	295.56	3.6e-88
TaPIN11	10	359	9	361	PF03547.18	Mem_trans	2	385	387	279.99	1.9e-83
TaPIN12	9	583	9	583	PF03547.18	Mem_trans	1	387	387	572.44	2.9e-172
TaPIN13	9	354	9	354	PF03547.18	Mem_trans	1	387	387	349.01	2.1e-104
TaPIN14	9	91	9	100	PF03547.18	Mem_trans	1	83	387	91.56	3.4e-26
TaPIN14	115	426	108	426	PF03547.18	Mem_trans	89	387	387	204.56	1.6e-60
TaPIN15	10	370	9	371	PF03547.18	Mem_trans	2	386	387	276.76	1.9e-82
TaPIN16	9	563	9	563	PF03547.18	Mem_trans	1	387	387	583.64	1.1e-175
TaPIN17	9	561	9	561	PF03547.18	Mem_trans	1	387	387	581.18	6.3e-175
TaPIN18	9	561	9	561	PF03547.18	Mem_trans	1	387	387	581.55	4.9e-175
TaPIN19	10	168	9	192	PF03547.18	Mem_trans	2	151	387	127.31	4.7e-37
TaPIN19	206	358	193	358	PF03547.18	Mem_trans	235	387	387	160.31	4.4e-47
TaPIN20	10	90	9	97	PF03547.18	Mem_trans	2	82	387	63.05	1.5e-17
TaPIN20	118	381	116	381	PF03547.18	Mem_trans	90	387	387	172.09	1.2e-50
TaPIN21	10	189	9	208	PF03547.18	Mem_trans	2	171	387	113.2	9.1e-33
TaPIN21	221	356	213	357	PF03547.18	Mem_trans	235	370	387	126.08	1.1e-36
TaPIN22	10	172	9	201	PF03547.18	Mem_trans	2	152	387	124.65	3e-36
TaPIN22	209	361	203	361	PF03547.18	Mem_trans	235	387	387	159.73	6.6e-47
TaPIN23	10	168	9	181	PF03547.18	Mem_trans	2	151	387	123.79	5.5e-36
TaPIN23	202	357	189	357	PF03547.18	Mem_trans	232	387	387	164.57	2.2e-48
TaPIN24	10	91	9	99	PF03547.18	Mem_trans	2	83	387	64.08	7.6e-18
TaPIN24	115	184	109	212	PF03547.18	Mem_trans	91	160	387	36.79	1.5e-09
TaPIN24	218	371	207	371	PF03547.18	Mem_trans	234	387	387	140.56	4.4e-41
TaPIN25	10	90	9	100	PF03547.18	Mem_trans	2	82	387	60.83	7.3e-17
TaPIN25	118	188	116	218	PF03547.18	Mem_trans	90	160	387	36.34	2e-09
TaPIN25	229	381	222	381	PF03547.18	Mem_trans	235	387	387	141.75	1.9e-41
TaPIN26	10	171	9	194	PF03547.18	Mem_trans	2	151	387	124.76	2.8e-36
TaPIN26	205	360	184	360	PF03547.18	Mem_trans	232	387	387	162.27	1.1e-47
TaPIN27	10	89	9	99	PF03547.18	Mem_trans	2	81	387	62.26	2.7e-17
TaPIN27	115	184	109	210	PF03547.18	Mem_trans	91	160	387	37.87	6.9e-10
TaPIN27	218	371	189	371	PF03547.18	Mem_trans	234	387	387	139.01	1.3e-40
TaPIN28	10	90	9	104	PF03547.18	Mem_trans	2	82	387	64.23	6.8e-18
TaPIN28	119	188	116	210	PF03547.18	Mem_trans	91	160	387	35.57	3.4e-09
TaPIN28	229	381	222	381	PF03547.18	Mem_trans	235	387	387	141.27	2.7e-41
TaPIN29	10	370	9	370	PF03547.18	Mem_trans	2	387	387	242.26	5.6e-72
TaPIN30	9	583	9	583	PF03547.18	Mem_trans	1	387	387	644.1	4.9e-194
TaPIN31	9	490	9	495	PF03547.18	Mem_trans	1	293	387	481.96	8.7e-145
TaPIN32	9	584	9	584	PF03547.18	Mem_trans	1	387	387	644.15	4.7e-194
TaPIN33	9	582	9	582	PF03547.18	Mem_trans	1	387	387	648.14	2.9e-195
TaPIN34	10	361	9	361	PF03547.18	Mem_trans	2	387	387	298.58	4.4e-89
TaPIN35	10	627	9	627	PF03547.18	Mem_trans	2	387	387	563.66	1.3e-169
TaPIN36	9	581	9	581	PF03547.18	Mem_trans	1	387	387	648.13	2.9e-195
TaPIN37	9	401	9	401	PF03547.18	Mem_trans	1	387	387	286.84	1.6e-85
TaPIN38	9	91	9	101	PF03547.18	Mem_trans	1	83	387	88.93	2.1e-25
TaPIN38	115	392	109	393	PF03547.18	Mem_trans	90	370	387	176.56	5.1e-52
TaPIN39	10	394	9	394	PF03547.18	Mem_trans	2	387	387	278.59	5.2e-83
TaPIN40	10	627	9	627	PF03547.18	Mem_trans	2	387	387	563.58	1.4e-169
TaPIN41	9	581	9	581	PF03547.18	Mem_trans	1	387	387	648.36	2.5e-195
TaPIN42	10	374	9	374	PF03547.18	Mem_trans	2	387	387	291.5	6.2e-87
TaPIN43	10	273	9	283	PF03547.18	Mem_trans	2	268	387	149.06	1.2e-43
TaPIN44	10	628	9	628	PF03547.18	Mem_trans	2	387	387	563.75	1.2e-169
