# Supplementary material for: Genome-Wide Identification and Characterization of PIN-FORMED (PIN) Gene Family Reveals Role in Developmental and Various Stress Conditions in Triticum aestivum L
Source: Int J Mol Sci. 2021 Jul 9;22(14):7396. doi: 10.3390/ijms22147396 (PMC8303626; doi:10.3390/ijms22147396)
Supplement: Supplementary file 1 [file ijms-22-07396-s001.zip › Table S5.xls]

## Sheet: Sheet1
Table S5: Cis-regulatory elements present in the TaPIN gene promoter region.
Gene ID	Cis-element	Sequence	Position	Length	Transcription direction	Species	Function
TaPIN1	Sp1	GGGCGG	1991	6	-	Oryza sativa	light responsive element
TaPIN1	CGTCA-motif	CGTCA	205	5	-	Hordeum vulgare	cis-acting regulatory element involved in the MeJA-responsiveness
TaPIN1	CGTCA-motif	CGTCA	299	5	-	Hordeum vulgare	cis-acting regulatory element involved in the MeJA-responsiveness
TaPIN1	CGTCA-motif	CGTCA	773	5	-	Hordeum vulgare	cis-acting regulatory element involved in the MeJA-responsiveness
TaPIN1	CGTCA-motif	CGTCA	1173	5	-	Hordeum vulgare	cis-acting regulatory element involved in the MeJA-responsiveness
TaPIN1	CGTCA-motif	CGTCA	1220	5	-	Hordeum vulgare	cis-acting regulatory element involved in the MeJA-responsiveness
TaPIN1	CGTCA-motif	CGTCA	1580	5	-	Hordeum vulgare	cis-acting regulatory element involved in the MeJA-responsiveness
TaPIN1	ATCT-motif	AATCTAATCC	737	9	-	Pisum sativum	part of a conserved DNA module involved in light responsiveness
TaPIN1	G-box	ACACGTGT	1148	8	-	Brassica napus	cis-acting regulatory element involved in light responsiveness
TaPIN1	G-box	CACGTG	1149	6	-	Arabidopsis thaliana	cis-acting regulatory element involved in light responsiveness
TaPIN1	G-box	TACGTG	1978	6	-	Arabidopsis thaliana	cis-acting regulatory element involved in light responsiveness
TaPIN1	CCAAT-box	CAACGG	752	6	-	Hordeum vulgare	MYBHv1 binding site
TaPIN1	MBS	CAACTG	1207	6	-	Arabidopsis thaliana	MYB binding site involved in drought-inducibility
TaPIN1	A-box	CCGTCC	613	6	-	Petroselinum crispum	cis-acting regulatory element
TaPIN1	Box II	ACACGTTGT	1639	9	-	Sinapis alba	part of a light responsive element
TaPIN1	O2-site	GATGATGTGG	466	9	-	Zea mays	cis-acting regulatory element involved in zein metabolism regulation
TaPIN1	TCT-motif	TCTTAC	918	6	-	Arabidopsis thaliana	part of a light responsive element
TaPIN1	ACE	GACACGTATG	1147	9	-	Petroselinum crispum	cis-acting element involved in light responsiveness
TaPIN1	ABRE	CGCACGTGTC	1147	9	-	Hordeum vulgare	cis-acting element involved in the abscisic acid responsiveness
TaPIN1	ABRE	CACGTG	1149	6	-	Arabidopsis thaliana	cis-acting element involved in the abscisic acid responsiveness
TaPIN1	ABRE	ACGTG	1150	5	-	Arabidopsis thaliana	cis-acting element involved in the abscisic acid responsiveness
TaPIN1	ABRE	ACGTG	1640	5	-	Arabidopsis thaliana	cis-acting element involved in the abscisic acid responsiveness
TaPIN1	ABRE	ACGTG	1979	5	-	Arabidopsis thaliana	cis-acting element involved in the abscisic acid responsiveness
TaPIN1	TGACG-motif	TGACG	205	5	-	Hordeum vulgare	cis-acting regulatory element involved in the MeJA-responsiveness
TaPIN1	TGACG-motif	TGACG	299	5	-	Hordeum vulgare	cis-acting regulatory element involved in the MeJA-responsiveness
TaPIN1	TGACG-motif	TGACG	773	5	-	Hordeum vulgare	cis-acting regulatory element involved in the MeJA-responsiveness
TaPIN1	TGACG-motif	TGACG	1173	5	-	Hordeum vulgare	cis-acting regulatory element involved in the MeJA-responsiveness
TaPIN1	TGACG-motif	TGACG	1220	5	-	Hordeum vulgare	cis-acting regulatory element involved in the MeJA-responsiveness
TaPIN1	TGACG-motif	TGACG	1580	5	-	Hordeum vulgare	cis-acting regulatory element involved in the MeJA-responsiveness
TaPIN1	GTGGC-motif	CAGCGTGTGGC	53	10	-	Hordeum vulgare	part of a light responsive element
TaPIN1	G-Box	CACGTG	1149	6	-	Pisum sativum	cis-acting regulatory element involved in light responsiveness
TaPIN1	G-Box	CACGTT	1640	6	-	Pisum sativum	cis-acting regulatory element involved in light responsiveness
TaPIN2	O2-site	GATGACATGG	409	9	+	Zea mays	cis-acting regulatory element involved in zein metabolism regulation
TaPIN2	G-Box	CACGTG	461	6	+	Pisum sativum	cis-acting regulatory element involved in light responsiveness
TaPIN2	G-Box	CACGTT	1642	6	+	Pisum sativum	cis-acting regulatory element involved in light responsiveness
TaPIN2	CGTCA-motif	CGTCA	351	5	+	Hordeum vulgare	cis-acting regulatory element involved in the MeJA-responsiveness
TaPIN2	CGTCA-motif	CGTCA	1575	5	+	Hordeum vulgare	cis-acting regulatory element involved in the MeJA-responsiveness
TaPIN3	MRE	AACCTAA	387	7	+	Petroselinum crispum	MYB binding site involved in light responsiveness
TaPIN3	TCT-motif	TCTTAC	864	6	+	Arabidopsis thaliana	part of a light responsive element
TaPIN3	ATCT-motif	AATCTAATCC	682	9	+	Pisum sativum	part of a conserved DNA module involved in light responsiveness
TaPIN3	Box 4	ATTAAT	1459	6	+	Petroselinum crispum	part of a conserved DNA module involved in light responsiveness
TaPIN3	TATA-box	TATA	40	4	+	Arabidopsis thaliana	core promoter element around -30 of transcription start
TaPIN3	Sp1	GGGCGG	1991	6	+	Oryza sativa	light responsive element
TaPIN3	Gap-box	CAAATGAA(A/G)A	518	9.5	+	Arabidopsis thaliana	part of a light responsive element
TaPIN3	ARE	AAACCA	447	6	+	Zea mays	cis-acting regulatory element essential for the anaerobic induction
TaPIN3	ARE	AAACCA	1698	6	+	Zea mays	cis-acting regulatory element essential for the anaerobic induction
TaPIN3	TGACG-motif	TGACG	718	5	+	Hordeum vulgare	cis-acting regulatory element involved in the MeJA-responsiveness
TaPIN3	TGACG-motif	TGACG	1511	5	+	Hordeum vulgare	cis-acting regulatory element involved in the MeJA-responsiveness
TaPIN3	ABRE	ACGTG	21	5	+	Arabidopsis thaliana	cis-acting element involved in the abscisic acid responsiveness
TaPIN3	ABRE	CACGTG	1081	6	+	Arabidopsis thaliana	cis-acting element involved in the abscisic acid responsiveness
TaPIN3	ABRE	ACGTG	1082	5	+	Arabidopsis thaliana	cis-acting element involved in the abscisic acid responsiveness
TaPIN3	ABRE	ACGTG	1509	5	+	Arabidopsis thaliana	cis-acting element involved in the abscisic acid responsiveness
TaPIN3	ABRE	ACGTG	1639	5	+	Arabidopsis thaliana	cis-acting element involved in the abscisic acid responsiveness
TaPIN3	ABRE	ACGTG	1979	5	+	Arabidopsis thaliana	cis-acting element involved in the abscisic acid responsiveness
TaPIN3	Box II	ACACGTTGT	1638	9	+	Sinapis alba	part of a light responsive element
TaPIN3	TATC-box	TATCCCA	352	7	+	Oryza sativa	cis-acting element involved in gibberellin-responsiveness
TaPIN3	CGTCA-motif	CGTCA	718	5	+	Hordeum vulgare	cis-acting regulatory element involved in the MeJA-responsiveness
TaPIN3	CGTCA-motif	CGTCA	1511	5	+	Hordeum vulgare	cis-acting regulatory element involved in the MeJA-responsiveness
TaPIN3	O2-site	GATGA(C/T)(A/G)TG(A/G)	222	8	+	Zea mays	cis-acting regulatory element involved in zein metabolism regulation
TaPIN3	LTR	CCGAAA	1128	6	+	Hordeum vulgare	cis-acting element involved in low-temperature responsiveness
TaPIN3	G-box	TACGTG	21	6	+	Arabidopsis thaliana	cis-acting regulatory element involved in light responsiveness
TaPIN3	G-box	ACACGTGT	1080	8	+	Brassica napus	cis-acting regulatory element involved in light responsiveness
TaPIN3	G-box	CACGTG	1081	6	+	Arabidopsis thaliana	cis-acting regulatory element involved in light responsiveness
TaPIN3	G-box	CACGTC	1509	6	+	Zea mays	cis-acting regulatory element involved in light responsiveness
TaPIN3	G-box	TACGTG	1978	6	+	Arabidopsis thaliana	cis-acting regulatory element involved in light responsiveness
TaPIN3	CCAAT-box	CAACGG	697	6	+	Hordeum vulgare	MYBHv1 binding site
TaPIN3	G-Box	CACGTG	1081	6	+	Pisum sativum	cis-acting regulatory element involved in light responsiveness
TaPIN3	G-Box	CACGTT	1639	6	+	Pisum sativum	cis-acting regulatory element involved in light responsiveness
TaPIN4	CGTCA-motif	CGTCA	627	5	+	Hordeum vulgare	cis-acting regulatory element involved in the MeJA-responsiveness
TaPIN4	CGTCA-motif	CGTCA	1026	5	+	Hordeum vulgare	cis-acting regulatory element involved in the MeJA-responsiveness
TaPIN4	CGTCA-motif	CGTCA	1063	5	+	Hordeum vulgare	cis-acting regulatory element involved in the MeJA-responsiveness
TaPIN4	CGTCA-motif	CGTCA	1233	5	+	Hordeum vulgare	cis-acting regulatory element involved in the MeJA-responsiveness
TaPIN4	CCAAT-box	CAACGG	181	6	+	Hordeum vulgare	MYBHv1 binding site
TaPIN4	CCAAT-box	CAACGG	1492	6	+	Hordeum vulgare	MYBHv1 binding site
TaPIN4	TCT-motif	TCTTAC	1132	6	+	Arabidopsis thaliana	part of a light responsive element
TaPIN4	TGACG-motif	TGACG	627	5	+	Hordeum vulgare	cis-acting regulatory element involved in the MeJA-responsiveness
TaPIN4	TGACG-motif	TGACG	1026	5	+	Hordeum vulgare	cis-acting regulatory element involved in the MeJA-responsiveness
TaPIN4	TGACG-motif	TGACG	1063	5	+	Hordeum vulgare	cis-acting regulatory element involved in the MeJA-responsiveness
TaPIN4	TGACG-motif	TGACG	1233	5	+	Hordeum vulgare	cis-acting regulatory element involved in the MeJA-responsiveness
TaPIN4	G-box	TACGTG	279	6	+	Arabidopsis thaliana	cis-acting regulatory element involved in light responsiveness
TaPIN4	G-box	CACGAC	524	6	+	Zea mays	cis-acting regulatory element involved in light responsiveness
TaPIN4	O2-site	GATGATGTGG	647	9	+	Zea mays	cis-acting regulatory element involved in zein metabolism regulation
TaPIN4	O2-site	GATGA(C/T)(A/G)TG(A/G)	1510	8	+	Zea mays	cis-acting regulatory element involved in zein metabolism regulation
TaPIN4	AuxRR-core	GGTCCAT	34	7	+	Nicotiana tabacum	cis-acting regulatory element involved in auxin responsiveness
TaPIN4	AuxRR-core	GGTCCAT	1296	7	+	Nicotiana tabacum	cis-acting regulatory element involved in auxin responsiveness
TaPIN4	GC-motif	CCCCCG	1796	6	+	Zea mays	enhancer-like element involved in anoxic specific inducibility
TaPIN4	Box 4	ATTAAT	638	6	+	Petroselinum crispum	part of a conserved DNA module involved in light responsiveness
TaPIN4	Box 4	ATTAAT	1559	6	+	Petroselinum crispum	part of a conserved DNA module involved in light responsiveness
TaPIN4	Box 4	ATTAAT	1887	6	+	Petroselinum crispum	part of a conserved DNA module involved in light responsiveness
TaPIN4	CAT-box	GCCACT	980	6	+	Arabidopsis thaliana	cis-acting regulatory element related to meristem expression
TaPIN4	CAT-box	GCCACT	1385	6	+	Arabidopsis thaliana	cis-acting regulatory element related to meristem expression
TaPIN4	CAAT-box	CCAAT	1374	5	+	Arabidopsis thaliana	common cis-acting element in promoter and enhancer regions
TaPIN4	CAAT-box	CAAAT	1884	5	+	Pisum sativum	common cis-acting element in promoter and enhancer regions
TaPIN4	I-box	GTATAAGGCC	1443	9	+	Larix laricina	part of a light responsive element
TaPIN4	Sp1	GGGCGG	1991	6	+	Oryza sativa	light responsive element
TaPIN4	TGA-element	AACGAC	1044	6	+	Brassica oleracea	auxin-responsive element
TaPIN4	TGA-element	AACGAC	1103	6	+	Brassica oleracea	auxin-responsive element
TaPIN4	ARE	AAACCA	1818	6	+	Zea mays	cis-acting regulatory element essential for the anaerobic induction
TaPIN4	ABRE	ACGTG	280	5	+	Arabidopsis thaliana	cis-acting element involved in the abscisic acid responsiveness
TaPIN4	ABRE	GCCGCGTGGC	1160	9	+	Oryza sativa	cis-acting element involved in the abscisic acid responsiveness
TaPIN5	chs-CMA1a	TTACTTAA	1792	8	+	Daucus carota	part of a light responsive element
TaPIN5	I-box	AAGATAAGGCT	1387	10	+	Gossypium hirsutum	part of a light responsive element
TaPIN5	chs-CMA2a	TCACTTGA	129	8	+	Petroselinum crispum	part of a light responsive element
TaPIN5	TCA-element	CCATCTTTTT	556	9	+	Nicotiana tabacum	cis-acting element involved in salicylic acid responsiveness
TaPIN5	O2-site	GATGA(C/T)(A/G)TG(A/G)	685	8	+	Zea mays	cis-acting regulatory element involved in zein metabolism regulation
TaPIN5	GT1-motif	GGTTAA	1655	6	+	Arabidopsis thaliana	light responsive element
TaPIN5	GATA-motif	AAGGATAAGG	805	9	+	Solanum tuberosum	part of a light responsive element
TaPIN5	TGACG-motif	TGACG	345	5	+	Hordeum vulgare	cis-acting regulatory element involved in the MeJA-responsiveness
TaPIN5	P-box	CCTTTTG	217	7	+	Oryza sativa	gibberellin-responsive element
TaPIN5	P-box	CCTTTTG	802	7	+	Oryza sativa	gibberellin-responsive element
TaPIN5	P-box	CCTTTTG	1565	7	+	Oryza sativa	gibberellin-responsive element
TaPIN5	G-box	TAACACGTAG	525	9	+	Brassica oleracea	cis-acting regulatory element involved in light responsiveness
TaPIN6	ARE	AAACCA	184	6	-	Zea mays	cis-acting regulatory element essential for the anaerobic induction
TaPIN6	ARE	AAACCA	241	6	-	Zea mays	cis-acting regulatory element essential for the anaerobic induction
TaPIN6	ARE	AAACCA	273	6	-	Zea mays	cis-acting regulatory element essential for the anaerobic induction
TaPIN6	ARE	AAACCA	1020	6	-	Zea mays	cis-acting regulatory element essential for the anaerobic induction
TaPIN6	ARE	AAACCA	1536	6	-	Zea mays	cis-acting regulatory element essential for the anaerobic induction
TaPIN6	ARE	AAACCA	1692	6	-	Zea mays	cis-acting regulatory element essential for the anaerobic induction
TaPIN6	ARE	AAACCA	1735	6	-	Zea mays	cis-acting regulatory element essential for the anaerobic induction
TaPIN6	CAT-box	GCCACT	827	6	-	Arabidopsis thaliana	cis-acting regulatory element related to meristem expression
TaPIN6	CAT-box	GCCACT	1294	6	-	Arabidopsis thaliana	cis-acting regulatory element related to meristem expression
TaPIN6	CAT-box	GCCACT	1794	6	-	Arabidopsis thaliana	cis-acting regulatory element related to meristem expression
TaPIN6	GARE-motif	TCTGTTG	913	7	-	Brassica oleracea	gibberellin-responsive element
TaPIN6	GC-motif	CCCCCG	1060	6	-	Zea mays	enhancer-like element involved in anoxic specific inducibility
TaPIN6	G-Box	TCCACATGGCA	996	10	-	Triticum aestivum	cis-acting regulatory element involved in light responsiveness
TaPIN6	CCAAT-box	CAACGG	833	6	-	Hordeum vulgare	MYBHv1 binding site
TaPIN6	CCAAT-box	CAACGG	1209	6	-	Hordeum vulgare	MYBHv1 binding site
TaPIN6	RY-element	CATGCATG	1589	8	-	Helianthus annuus	cis-acting regulatory element involved in seed-specific regulation
TaPIN6	ATC-motif	TGCTATCCA	432	9	-	Pisum sativum	part of a conserved DNA module involved in light responsiveness
TaPIN6	Sp1	GGGCGG	1278	6	-	Oryza sativa	light responsive element
TaPIN6	MBS	CAACTG	1051	6	-	Arabidopsis thaliana	MYB binding site involved in drought-inducibility
TaPIN6	TGACG-motif	TGACG	102	5	-	Hordeum vulgare	cis-acting regulatory element involved in the MeJA-responsiveness
TaPIN6	TGACG-motif	TGACG	300	5	-	Hordeum vulgare	cis-acting regulatory element involved in the MeJA-responsiveness
TaPIN6	TGACG-motif	TGACG	940	5	-	Hordeum vulgare	cis-acting regulatory element involved in the MeJA-responsiveness
TaPIN6	TGACG-motif	TGACG	1778	5	-	Hordeum vulgare	cis-acting regulatory element involved in the MeJA-responsiveness
TaPIN6	CGTCA-motif	CGTCA	102	5	-	Hordeum vulgare	cis-acting regulatory element involved in the MeJA-responsiveness
TaPIN6	CGTCA-motif	CGTCA	300	5	-	Hordeum vulgare	cis-acting regulatory element involved in the MeJA-responsiveness
TaPIN6	CGTCA-motif	CGTCA	940	5	-	Hordeum vulgare	cis-acting regulatory element involved in the MeJA-responsiveness
TaPIN6	CGTCA-motif	CGTCA	1778	5	-	Hordeum vulgare	cis-acting regulatory element involved in the MeJA-responsiveness
TaPIN6	O2-site	GTTGACGTGA	937	9	-	Zea mays	cis-acting regulatory element involved in zein metabolism regulation
TaPIN6	G-box	CAGACGTGGCA	299	10	-	Nicotiana plumbaginifolia	cis-acting regulatory element involved in light responsiveness
TaPIN6	G-box	CACGTC	301	6	-	Zea mays	cis-acting regulatory element involved in light responsiveness
TaPIN6	G-box	CACGTC	938	6	-	Zea mays	cis-acting regulatory element involved in light responsiveness
TaPIN6	G-box	GCCACGTGGA	997	9	-	Arabidopsis thaliana	cis-acting regulatory element involved in light responsiveness
TaPIN6	G-box	CACGAC	1647	6	-	Zea mays	cis-acting regulatory element involved in light responsiveness
TaPIN6	ABRE	ACGTG	302	5	-	Arabidopsis thaliana	cis-acting element involved in the abscisic acid responsiveness
TaPIN6	ABRE	AACCCGG	744	7	-	Arabidopsis thaliana	cis-acting element involved in the abscisic acid responsiveness
TaPIN6	ABRE	ACGTG	938	5	-	Arabidopsis thaliana	cis-acting element involved in the abscisic acid responsiveness
TaPIN6	ABRE	AACCCGG	1782	7	-	Arabidopsis thaliana	cis-acting element involved in the abscisic acid responsiveness
TaPIN6	ABRE	TACGGTC	1970	7	-	Arabidopsis thaliana	cis-acting element involved in the abscisic acid responsiveness
TaPIN6	ACE	GCGACGTACC	612	9	-	Petroselinum crispum	cis-acting element involved in light responsiveness
TaPIN7	TCA-element	CCATCTTTTT	650	9	+	Nicotiana tabacum	cis-acting element involved in salicylic acid responsiveness
TaPIN7	CGTCA-motif	CGTCA	611	5	+	Hordeum vulgare	cis-acting regulatory element involved in the MeJA-responsiveness
TaPIN7	CGTCA-motif	CGTCA	943	5	+	Hordeum vulgare	cis-acting regulatory element involved in the MeJA-responsiveness
TaPIN7	CGTCA-motif	CGTCA	1098	5	+	Hordeum vulgare	cis-acting regulatory element involved in the MeJA-responsiveness
TaPIN7	CGTCA-motif	CGTCA	1148	5	+	Hordeum vulgare	cis-acting regulatory element involved in the MeJA-responsiveness
TaPIN7	CGTCA-motif	CGTCA	1282	5	+	Hordeum vulgare	cis-acting regulatory element involved in the MeJA-responsiveness
TaPIN7	RY-element	CATGCATG	291	8	+	Helianthus annuus	cis-acting regulatory element involved in seed-specific regulation
TaPIN7	RY-element	CATGCATG	533	8	+	Helianthus annuus	cis-acting regulatory element involved in seed-specific regulation
TaPIN7	ARE	AAACCA	29	6	+	Zea mays	cis-acting regulatory element essential for the anaerobic induction
TaPIN7	ARE	AAACCA	1206	6	+	Zea mays	cis-acting regulatory element essential for the anaerobic induction
TaPIN7	CAT-box	GCCACT	1699	6	+	Arabidopsis thaliana	cis-acting regulatory element related to meristem expression
TaPIN7	O2-site	GATGATGTGG	129	9	+	Zea mays	cis-acting regulatory element involved in zein metabolism regulation
TaPIN7	O2-site	GATGACATGG	1495	9	+	Zea mays	cis-acting regulatory element involved in zein metabolism regulation
TaPIN7	O2-site	GATGACATGG	1550	9	+	Zea mays	cis-acting regulatory element involved in zein metabolism regulation
TaPIN7	LTR	CCGAAA	1051	6	+	Hordeum vulgare	cis-acting element involved in low-temperature responsiveness
TaPIN7	LTR	CCGAAA	1356	6	+	Hordeum vulgare	cis-acting element involved in low-temperature responsiveness
TaPIN7	LTR	CCGAAA	1429	6	+	Hordeum vulgare	cis-acting element involved in low-temperature responsiveness
TaPIN7	G-box	CACGAC	108	6	+	Zea mays	cis-acting regulatory element involved in light responsiveness
TaPIN7	G-box	TACGTG	393	6	+	Arabidopsis thaliana	cis-acting regulatory element involved in light responsiveness
TaPIN7	G-box	TACGTG	1268	6	+	Arabidopsis thaliana	cis-acting regulatory element involved in light responsiveness
TaPIN7	G-box	TACGTG	1443	6	+	Arabidopsis thaliana	cis-acting regulatory element involved in light responsiveness
TaPIN7	G-box	TACGTG	1985	6	+	Arabidopsis thaliana	cis-acting regulatory element involved in light responsiveness
TaPIN7	circadian	CAAAGATATC	223	9	+	Lycopersicon esculentum	cis-acting regulatory element involved in circadian control
TaPIN7	L-box	ATCCCACCTAC	1439	10	+	Petroselinum crispum	part of a light responsive element
TaPIN7	GATA-motif	AAGGATAAGG	132	9	+	Solanum tuberosum	part of a light responsive element
TaPIN7	TGACG-motif	TGACG	611	5	+	Hordeum vulgare	cis-acting regulatory element involved in the MeJA-responsiveness
TaPIN7	TGACG-motif	TGACG	943	5	+	Hordeum vulgare	cis-acting regulatory element involved in the MeJA-responsiveness
TaPIN7	TGACG-motif	TGACG	1098	5	+	Hordeum vulgare	cis-acting regulatory element involved in the MeJA-responsiveness
TaPIN7	TGACG-motif	TGACG	1148	5	+	Hordeum vulgare	cis-acting regulatory element involved in the MeJA-responsiveness
TaPIN7	TGACG-motif	TGACG	1282	5	+	Hordeum vulgare	cis-acting regulatory element involved in the MeJA-responsiveness
TaPIN7	ABRE	ACGTG	393	5	+	Arabidopsis thaliana	cis-acting element involved in the abscisic acid responsiveness
TaPIN7	ABRE	ACGTG	1269	5	+	Arabidopsis thaliana	cis-acting element involved in the abscisic acid responsiveness
TaPIN7	ABRE	ACGTG	1443	5	+	Arabidopsis thaliana	cis-acting element involved in the abscisic acid responsiveness
TaPIN7	ABRE	CGTACGTGCA	1605	9	+	Hordeum vulgare	cis-acting element involved in the abscisic acid responsiveness
TaPIN7	ABRE	ACGTG	1985	5	+	Arabidopsis thaliana	cis-acting element involved in the abscisic acid responsiveness
TaPIN7	Box 4	ATTAAT	58	6	+	Petroselinum crispum	part of a conserved DNA module involved in light responsiveness
TaPIN7	Box 4	ATTAAT	883	6	+	Petroselinum crispum	part of a conserved DNA module involved in light responsiveness
TaPIN7	I-box	gGATAAGGTG	130	9	+	Zea mays	part of a light responsive element
TaPIN7	MRE	AACCTAA	1677	7	+	Petroselinum crispum	MYB binding site involved in light responsiveness
TaPIN8	G-box	TACGTG	1733	6	-	Arabidopsis thaliana	cis-acting regulatory element involved in light responsiveness
TaPIN8	ARE	AAACCA	500	6	-	Zea mays	cis-acting regulatory element essential for the anaerobic induction
TaPIN8	3-AF1 binding site	TAAGAGAGGAA	823	10	-	Solanum tuberosum	light responsive element
TaPIN8	ABRE	GCCGCGTGGC	1063	9	-	Oryza sativa	cis-acting element involved in the abscisic acid responsiveness
TaPIN8	ABRE	ACGTG	1733	5	-	Arabidopsis thaliana	cis-acting element involved in the abscisic acid responsiveness
TaPIN8	CCAAT-box	CAACGG	1518	6	-	Hordeum vulgare	MYBHv1 binding site
TaPIN8	AE-box	AGAAACTT	1490	8	-	Arabidopsis thaliana	part of a module for light response
TaPIN8	Sp1	GGGCGG	227	6	-	Oryza sativa	light responsive element
TaPIN8	Sp1	GGGCGG	280	6	-	Oryza sativa	light responsive element
TaPIN8	Sp1	GGGCGG	1991	6	-	Oryza sativa	light responsive element
TaPIN8	TGACG-motif	TGACG	331	5	-	Hordeum vulgare	cis-acting regulatory element involved in the MeJA-responsiveness
TaPIN8	TGACG-motif	TGACG	1641	5	-	Hordeum vulgare	cis-acting regulatory element involved in the MeJA-responsiveness
TaPIN8	TGACG-motif	TGACG	1725	5	-	Hordeum vulgare	cis-acting regulatory element involved in the MeJA-responsiveness
TaPIN8	GATA-motif	GATAGGA	67	7	-	Arabidopsis thaliana	part of a light responsive element
TaPIN8	GATA-motif	GATAGGG	1551	7	-	Pisum sativum	part of a light responsive element
TaPIN8	CGTCA-motif	CGTCA	331	5	-	Hordeum vulgare	cis-acting regulatory element involved in the MeJA-responsiveness
TaPIN8	CGTCA-motif	CGTCA	1641	5	-	Hordeum vulgare	cis-acting regulatory element involved in the MeJA-responsiveness
TaPIN8	CGTCA-motif	CGTCA	1725	5	-	Hordeum vulgare	cis-acting regulatory element involved in the MeJA-responsiveness
TaPIN8	LTR	CCGAAA	436	6	-	Hordeum vulgare	cis-acting element involved in low-temperature responsiveness
TaPIN8	MSA-like	(T/C)C(T/C)AACGG(T/C)(T/C)A	1363	8.5	-	Catharanthus roseus	cis-acting element involved in cell cycle regulation
TaPIN8	Box 4	ATTAAT	1887	6	-	Petroselinum crispum	part of a conserved DNA module involved in light responsiveness
TaPIN9	chs-CMA1a	TTACTTAA	1792	8	+	Daucus carota	part of a light responsive element
TaPIN9	CAT-box	GCCACT	1473	6	+	Arabidopsis thaliana	cis-acting regulatory element related to meristem expression
TaPIN9	MBS	CAACTG	4	6	+	Arabidopsis thaliana	MYB binding site involved in drought-inducibility
TaPIN9	GARE-motif	TCTGTTG	382	7	+	Brassica oleracea	gibberellin-responsive element
TaPIN9	P-box	CCTTTTG	527	7	+	Oryza sativa	gibberellin-responsive element
TaPIN9	P-box	CCTTTTG	1103	7	+	Oryza sativa	gibberellin-responsive element
TaPIN9	P-box	CCTTTTG	1561	7	+	Oryza sativa	gibberellin-responsive element
TaPIN9	O2-site	GATGA(C/T)(A/G)TG(A/G)	986	8	+	Zea mays	cis-acting regulatory element involved in zein metabolism regulation
TaPIN9	GATA-motif	AAGGATAAGG	1106	9	+	Solanum tuberosum	part of a light responsive element
TaPIN9	TCCC-motif	TCTCCCT	596	7	+	Spinacia oleracea	part of a light responsive element
TaPIN9	TCA-element	CCATCTTTTT	857	9	+	Nicotiana tabacum	cis-acting element involved in salicylic acid responsiveness
TaPIN9	GT1-motif	GGTTAA	1651	6	+	Arabidopsis thaliana	light responsive element
TaPIN10	P-box	CCTTTTG	1403	7	-	Oryza sativa	gibberellin-responsive element
TaPIN10	ABRE	ACGTG	377	5	-	Arabidopsis thaliana	cis-acting element involved in the abscisic acid responsiveness
TaPIN10	ABRE	ACGTG	833	5	-	Arabidopsis thaliana	cis-acting element involved in the abscisic acid responsiveness
TaPIN10	ABRE	ACGTG	990	5	-	Arabidopsis thaliana	cis-acting element involved in the abscisic acid responsiveness
TaPIN10	ABRE	GACACGTACGT	1024	10	-	Oryza sativa	cis-acting element involved in the abscisic acid responsiveness
TaPIN10	ABRE	AACCCGG	1079	7	-	Arabidopsis thaliana	cis-acting element involved in the abscisic acid responsiveness
TaPIN10	ABRE	ACGTG	1235	5	-	Arabidopsis thaliana	cis-acting element involved in the abscisic acid responsiveness
TaPIN10	ABRE	AACCCGG	1786	7	-	Arabidopsis thaliana	cis-acting element involved in the abscisic acid responsiveness
TaPIN10	G-box	CACGTC	376	6	-	Zea mays	cis-acting regulatory element involved in light responsiveness
TaPIN10	G-box	CACGAC	1190	6	-	Zea mays	cis-acting regulatory element involved in light responsiveness
TaPIN10	G-box	CACGAC	1631	6	-	Zea mays	cis-acting regulatory element involved in light responsiveness
TaPIN10	TGA-element	AACGAC	804	6	-	Brassica oleracea	auxin-responsive element
TaPIN10	TGA-element	AACGAC	867	6	-	Brassica oleracea	auxin-responsive element
TaPIN10	CAT-box	GCCACT	1798	6	-	Arabidopsis thaliana	cis-acting regulatory element related to meristem expression
TaPIN10	GA-motif	ATAGATAA	291	8	-	Arabidopsis thaliana	part of a light responsive element
TaPIN10	G-Box	CACGTT	833	6	-	Pisum sativum	cis-acting regulatory element involved in light responsiveness
TaPIN10	G-Box	CACGTT	990	6	-	Pisum sativum	cis-acting regulatory element involved in light responsiveness
TaPIN10	G-Box	CACGTT	1235	6	-	Pisum sativum	cis-acting regulatory element involved in light responsiveness
TaPIN10	ARE	AAACCA	964	6	-	Zea mays	cis-acting regulatory element essential for the anaerobic induction
TaPIN10	ARE	AAACCA	1004	6	-	Zea mays	cis-acting regulatory element essential for the anaerobic induction
TaPIN10	ARE	AAACCA	1696	6	-	Zea mays	cis-acting regulatory element essential for the anaerobic induction
TaPIN10	ARE	AAACCA	1739	6	-	Zea mays	cis-acting regulatory element essential for the anaerobic induction
TaPIN10	CGTCA-motif	CGTCA	375	5	-	Hordeum vulgare	cis-acting regulatory element involved in the MeJA-responsiveness
TaPIN10	CGTCA-motif	CGTCA	1782	5	-	Hordeum vulgare	cis-acting regulatory element involved in the MeJA-responsiveness
TaPIN10	TGACG-motif	TGACG	375	5	-	Hordeum vulgare	cis-acting regulatory element involved in the MeJA-responsiveness
TaPIN10	TGACG-motif	TGACG	1782	5	-	Hordeum vulgare	cis-acting regulatory element involved in the MeJA-responsiveness
TaPIN10	RY-element	CATGCATG	998	8	-	Helianthus annuus	cis-acting regulatory element involved in seed-specific regulation
TaPIN10	RY-element	CATGCATG	1573	8	-	Helianthus annuus	cis-acting regulatory element involved in seed-specific regulation
TaPIN10	Sp1	GGGCGG	516	6	-	Oryza sativa	light responsive element
TaPIN10	Sp1	GGGCGG	1252	6	-	Oryza sativa	light responsive element
TaPIN10	TCT-motif	TCTTAC	543	6	-	Arabidopsis thaliana	part of a light responsive element
TaPIN10	GTGGC-motif	CATCGTGTGGC	957	10	-	Arabidopsis thaliana	part of a light responsive element
TaPIN10	LTR	CCGAAA	1300	6	-	Hordeum vulgare	cis-acting element involved in low-temperature responsiveness
TaPIN10	O2-site	GATGACATGG	417	9	-	Zea mays	cis-acting regulatory element involved in zein metabolism regulation
TaPIN11	TATC-box	TATCCCA	162	7	-	Oryza sativa	cis-acting element involved in gibberellin-responsiveness
TaPIN11	GTGGC-motif	CAGCGTGTGGC	1735	10	-	Hordeum vulgare	part of a light responsive element
TaPIN11	GT1-motif	GGTTAA	839	6	-	Arabidopsis thaliana	light responsive element
TaPIN11	CGTCA-motif	CGTCA	869	5	-	Hordeum vulgare	cis-acting regulatory element involved in the MeJA-responsiveness
TaPIN11	CGTCA-motif	CGTCA	1074	5	-	Hordeum vulgare	cis-acting regulatory element involved in the MeJA-responsiveness
TaPIN11	G-box	CACGAC	196	6	-	Zea mays	cis-acting regulatory element involved in light responsiveness
TaPIN11	G-box	TACGTG	466	6	-	Arabidopsis thaliana	cis-acting regulatory element involved in light responsiveness
TaPIN11	G-box	TACGTG	1377	6	-	Arabidopsis thaliana	cis-acting regulatory element involved in light responsiveness
TaPIN11	G-box	TACGTG	1491	6	-	Arabidopsis thaliana	cis-acting regulatory element involved in light responsiveness
TaPIN11	G-box	TACGTG	1528	6	-	Arabidopsis thaliana	cis-acting regulatory element involved in light responsiveness
TaPIN11	G-box	CACGAC	1926	6	-	Zea mays	cis-acting regulatory element involved in light responsiveness
TaPIN11	O2-site	GATGACATGG	1432	9	-	Zea mays	cis-acting regulatory element involved in zein metabolism regulation
TaPIN11	O2-site	GATGACATGG	1448	9	-	Zea mays	cis-acting regulatory element involved in zein metabolism regulation
TaPIN11	O2-site	GATGACATGG	1546	9	-	Zea mays	cis-acting regulatory element involved in zein metabolism regulation
TaPIN11	CAT-box	GCCACT	1690	6	-	Arabidopsis thaliana	cis-acting regulatory element related to meristem expression
TaPIN11	I-box	gGATAAGGTG	1280	9	-	Zea mays	part of a light responsive element
TaPIN11	GATA-motif	AAGGATAAGG	1278	9	-	Solanum tuberosum	part of a light responsive element
TaPIN11	GATA-motif	GATAGGG	1281	7	-	Pisum sativum	part of a light responsive element
TaPIN11	ARE	AAACCA	1586	6	-	Zea mays	cis-acting regulatory element essential for the anaerobic induction
TaPIN11	Box 4	ATTAAT	146	6	-	Petroselinum crispum	part of a conserved DNA module involved in light responsiveness
TaPIN11	MBS	CAACTG	1086	6	-	Arabidopsis thaliana	MYB binding site involved in drought-inducibility
TaPIN11	ABRE	CGTACGTGCA	66	9	-	Hordeum vulgare	cis-acting element involved in the abscisic acid responsiveness
TaPIN11	ABRE	ACGTG	466	5	-	Arabidopsis thaliana	cis-acting element involved in the abscisic acid responsiveness
TaPIN11	ABRE	ACGTG	1377	5	-	Arabidopsis thaliana	cis-acting element involved in the abscisic acid responsiveness
TaPIN11	ABRE	ACGTG	1491	5	-	Arabidopsis thaliana	cis-acting element involved in the abscisic acid responsiveness
TaPIN11	ABRE	ACGTG	1528	5	-	Arabidopsis thaliana	cis-acting element involved in the abscisic acid responsiveness
TaPIN11	TCA-element	CCATCTTTTT	695	9	-	Nicotiana tabacum	cis-acting element involved in salicylic acid responsiveness
TaPIN11	LTR	CCGAAA	1407	6	-	Hordeum vulgare	cis-acting element involved in low-temperature responsiveness
TaPIN11	LTR	CCGAAA	1476	6	-	Hordeum vulgare	cis-acting element involved in low-temperature responsiveness
TaPIN11	MRE	AACCTAA	1668	7	-	Petroselinum crispum	MYB binding site involved in light responsiveness
TaPIN11	TGACG-motif	TGACG	869	5	-	Hordeum vulgare	cis-acting regulatory element involved in the MeJA-responsiveness
TaPIN11	TGACG-motif	TGACG	1074	5	-	Hordeum vulgare	cis-acting regulatory element involved in the MeJA-responsiveness
TaPIN11	RY-element	CATGCATG	366	8	-	Helianthus annuus	cis-acting regulatory element involved in seed-specific regulation
TaPIN11	RY-element	CATGCATG	588	8	+	Helianthus annuus	cis-acting regulatory element involved in seed-specific regulation
TaPIN12	GT1-motif	GGTTAA	1046	6	+	Arabidopsis thaliana	light responsive element
TaPIN12	MRE	AACCTAA	146	7	+	Petroselinum crispum	MYB binding site involved in light responsiveness
TaPIN12	MRE	AACCTAA	1122	7	+	Petroselinum crispum	MYB binding site involved in light responsiveness
TaPIN12	I-box	cCATATCCAAT	757	10	+	Flaveria trinervia	part of a light responsive element
TaPIN12	CCAAT-box	CAACGG	429	6	+	Hordeum vulgare	MYBHv1 binding site
TaPIN12	GTGGC-motif	GATTCTGTGGC	609	10	+	Spinacia oleracea	part of a light responsive element
TaPIN12	G-box	CACGAC	1277	6	+	Zea mays	cis-acting regulatory element involved in light responsiveness
TaPIN12	GATA-motif	GATAGGA	1649	7	+	Arabidopsis thaliana	part of a light responsive element
TaPIN12	Box 4	ATTAAT	1887	6	+	Petroselinum crispum	part of a conserved DNA module involved in light responsiveness
TaPIN12	Sp1	GGGCGG	769	6	+	Oryza sativa	light responsive element
TaPIN12	Sp1	GGGCGG	1307	6	+	Oryza sativa	light responsive element
TaPIN12	Sp1	GGGCGG	1366	6	+	Oryza sativa	light responsive element
TaPIN12	Sp1	GGGCGG	1991	6	+	Oryza sativa	light responsive element
TaPIN12	G-Box	CACGTT	26	6	+	Pisum sativum	cis-acting regulatory element involved in light responsiveness
TaPIN12	G-Box	CACGTT	280	6	+	Pisum sativum	cis-acting regulatory element involved in light responsiveness
TaPIN12	G-Box	CACGTT	970	6	+	Pisum sativum	cis-acting regulatory element involved in light responsiveness
TaPIN12	LTR	CCGAAA	623	6	+	Hordeum vulgare	cis-acting element involved in low-temperature responsiveness
TaPIN12	LTR	CCGAAA	1465	6	+	Hordeum vulgare	cis-acting element involved in low-temperature responsiveness
TaPIN12	GC-motif	CCCCCG	1796	6	+	Zea mays	enhancer-like element involved in anoxic specific inducibility
TaPIN12	ARE	AAACCA	3	6	+	Zea mays	cis-acting regulatory element essential for the anaerobic induction
TaPIN12	ARE	AAACCA	1822	6	+	Zea mays	cis-acting regulatory element essential for the anaerobic induction
TaPIN12	TGACG-motif	TGACG	1355	5	+	Hordeum vulgare	cis-acting regulatory element involved in the MeJA-responsiveness
TaPIN12	TGACG-motif	TGACG	1435	5	+	Hordeum vulgare	cis-acting regulatory element involved in the MeJA-responsiveness
TaPIN12	O2-site	GATGATGTGG	610	9	+	Zea mays	cis-acting regulatory element involved in zein metabolism regulation
TaPIN12	GARE-motif	TCTGTTG	161	7	+	Brassica oleracea	gibberellin-responsive element
TaPIN12	ABRE	ACGTG	26	5	+	Arabidopsis thaliana	cis-acting element involved in the abscisic acid responsiveness
TaPIN12	ABRE	ACGTG	280	5	+	Arabidopsis thaliana	cis-acting element involved in the abscisic acid responsiveness
TaPIN12	ABRE	ACGTG	970	5	+	Arabidopsis thaliana	cis-acting element involved in the abscisic acid responsiveness
TaPIN12	AE-box	AGAAACTT	403	8	+	Arabidopsis thaliana	part of a module for light response
TaPIN12	CAT-box	GCCACT	792	6	+	Arabidopsis thaliana	cis-acting regulatory element related to meristem expression
TaPIN12	CAT-box	GCCACT	1490	6	+	Arabidopsis thaliana	cis-acting regulatory element related to meristem expression
TaPIN12	CGTCA-motif	CGTCA	1355	5	+	Hordeum vulgare	cis-acting regulatory element involved in the MeJA-responsiveness
TaPIN12	CGTCA-motif	CGTCA	1435	5	+	Hordeum vulgare	cis-acting regulatory element involved in the MeJA-responsiveness
TaPIN12	MBS	CAACTG	236	6	+	Arabidopsis thaliana	MYB binding site involved in drought-inducibility
TaPIN12	MBS	CAACTG	1061	6	+	Arabidopsis thaliana	MYB binding site involved in drought-inducibility
TaPIN13	P-box	CCTTTTG	172	7	+	Oryza sativa	gibberellin-responsive element
TaPIN13	P-box	CCTTTTG	748	7	+	Oryza sativa	gibberellin-responsive element
TaPIN13	P-box	CCTTTTG	1564	7	+	Oryza sativa	gibberellin-responsive element
TaPIN13	GT1-motif	GGTTAA	1654	6	+	Arabidopsis thaliana	light responsive element
TaPIN13	TCCC-motif	TCTCCCT	241	7	+	Spinacia oleracea	part of a light responsive element
TaPIN13	ARE	AAACCA	516	6	+	Zea mays	cis-acting regulatory element essential for the anaerobic induction
TaPIN13	CAT-box	GCCACT	1476	6	+	Arabidopsis thaliana	cis-acting regulatory element related to meristem expression
TaPIN13	TCA-element	CCATCTTTTT	502	9	+	Nicotiana tabacum	cis-acting element involved in salicylic acid responsiveness
TaPIN13	chs-CMA1a	TTACTTAA	1791	8	+	Daucus carota	part of a light responsive element
TaPIN13	O2-site	GATGA(C/T)(A/G)TG(A/G)	631	8	+	Zea mays	cis-acting regulatory element involved in zein metabolism regulation
TaPIN13	GARE-motif	TCTGTTG	49	7	+	Brassica oleracea	gibberellin-responsive element
TaPIN14	RY-element	CATGCATG	980	8	-	Helianthus annuus	cis-acting regulatory element involved in seed-specific regulation
TaPIN14	RY-element	CATGCATG	1524	8	-	Helianthus annuus	cis-acting regulatory element involved in seed-specific regulation
TaPIN14	LTR	CCGAAA	912	6	-	Hordeum vulgare	cis-acting element involved in low-temperature responsiveness
TaPIN14	LTR	CCGAAA	1255	6	-	Hordeum vulgare	cis-acting element involved in low-temperature responsiveness
TaPIN14	CAT-box	GCCACT	257	6	-	Arabidopsis thaliana	cis-acting regulatory element related to meristem expression
TaPIN14	CAT-box	GCCACT	1801	6	-	Arabidopsis thaliana	cis-acting regulatory element related to meristem expression
TaPIN14	TCA-element	CCATCTTTTT	542	9	-	Nicotiana tabacum	cis-acting element involved in salicylic acid responsiveness
TaPIN14	TGACG-motif	TGACG	1735	5	-	Hordeum vulgare	cis-acting regulatory element involved in the MeJA-responsiveness
TaPIN14	TGACG-motif	TGACG	1785	5	-	Hordeum vulgare	cis-acting regulatory element involved in the MeJA-responsiveness
TaPIN14	ARE	AAACCA	946	6	-	Zea mays	cis-acting regulatory element essential for the anaerobic induction
TaPIN14	ARE	AAACCA	986	6	-	Zea mays	cis-acting regulatory element essential for the anaerobic induction
TaPIN14	ARE	AAACCA	1647	6	-	Zea mays	cis-acting regulatory element essential for the anaerobic induction
TaPIN14	ARE	AAACCA	1694	6	-	Zea mays	cis-acting regulatory element essential for the anaerobic induction
TaPIN14	ARE	AAACCA	1706	6	-	Zea mays	cis-acting regulatory element essential for the anaerobic induction
TaPIN14	ACE	GCGACGTACC	1763	9	-	Petroselinum crispum	cis-acting element involved in light responsiveness
TaPIN14	Sp1	GGGCGG	371	6	-	Oryza sativa	light responsive element
TaPIN14	Sp1	GGGCGG	1207	6	-	Oryza sativa	light responsive element
TaPIN14	P-box	CCTTTTG	1352	7	-	Oryza sativa	gibberellin-responsive element
TaPIN14	AE-box	AGAAACTT	381	8	-	Arabidopsis thaliana	part of a module for light response
TaPIN14	G-Box	CACGTT	81	6	-	Pisum sativum	cis-acting regulatory element involved in light responsiveness
TaPIN14	G-Box	CACGTT	813	6	-	Pisum sativum	cis-acting regulatory element involved in light responsiveness
TaPIN14	G-Box	CACGTT	972	6	-	Pisum sativum	cis-acting regulatory element involved in light responsiveness
TaPIN14	ABRE	ACGTG	82	5	-	Arabidopsis thaliana	cis-acting element involved in the abscisic acid responsiveness
TaPIN14	ABRE	ACGTG	397	5	-	Arabidopsis thaliana	cis-acting element involved in the abscisic acid responsiveness
TaPIN14	ABRE	ACGTG	813	5	-	Arabidopsis thaliana	cis-acting element involved in the abscisic acid responsiveness
TaPIN14	ABRE	ACGTG	972	5	-	Arabidopsis thaliana	cis-acting element involved in the abscisic acid responsiveness
TaPIN14	ABRE	GACACGTACGT	1009	10	-	Oryza sativa	cis-acting element involved in the abscisic acid responsiveness
TaPIN14	ABRE	AACCCGG	1789	7	-	Arabidopsis thaliana	cis-acting element involved in the abscisic acid responsiveness
TaPIN14	CGTCA-motif	CGTCA	1735	5	-	Hordeum vulgare	cis-acting regulatory element involved in the MeJA-responsiveness
TaPIN14	CGTCA-motif	CGTCA	1785	5	-	Hordeum vulgare	cis-acting regulatory element involved in the MeJA-responsiveness
TaPIN14	I-box	atGATAAGGTC	925	10	-	Helianthus annuus	part of a light responsive element
TaPIN14	GTGGC-motif	CATCGTGTGGC	939	10	-	Arabidopsis thaliana	part of a light responsive element
TaPIN14	CCAAT-box	CAACGG	996	6	-	Hordeum vulgare	MYBHv1 binding site
TaPIN14	G-box	CACGTC	397	6	-	Zea mays	cis-acting regulatory element involved in light responsiveness
TaPIN14	G-box	CACGAC	1145	6	-	Zea mays	cis-acting regulatory element involved in light responsiveness
TaPIN14	TGA-element	AACGAC	847	6	-	Brassica oleracea	auxin-responsive element
TaPIN15	GARE-motif	TCTGTTG	1073	7	-	Brassica oleracea	gibberellin-responsive element
TaPIN15	GARE-motif	TCTGTTG	1353	7	-	Brassica oleracea	gibberellin-responsive element
TaPIN15	CAT-box	GCCACT	1703	6	-	Arabidopsis thaliana	cis-acting regulatory element related to meristem expression
TaPIN15	CCAAT-box	CAACGG	1127	6	-	Hordeum vulgare	MYBHv1 binding site
TaPIN15	CCAAT-box	CAACGG	1179	6	-	Hordeum vulgare	MYBHv1 binding site
TaPIN15	CCAAT-box	CAACGG	1281	6	-	Hordeum vulgare	MYBHv1 binding site
TaPIN15	TCT-motif	TCTTAC	227	6	-	Arabidopsis thaliana	part of a light responsive element
TaPIN15	TC-rich repeats	GTTTTCTTAC	227	10	-	Nicotiana tabacum	cis-acting element involved in defense and stress responsiveness
TaPIN15	MBS	CAACTG	941	6	-	Arabidopsis thaliana	MYB binding site involved in drought-inducibility
TaPIN15	MBS	CAACTG	978	6	-	Arabidopsis thaliana	MYB binding site involved in drought-inducibility
TaPIN15	TGACG-motif	TGACG	116	5	-	Hordeum vulgare	cis-acting regulatory element involved in the MeJA-responsiveness
TaPIN15	TGACG-motif	TGACG	1014	5	-	Hordeum vulgare	cis-acting regulatory element involved in the MeJA-responsiveness
TaPIN15	TGACG-motif	TGACG	1131	5	-	Hordeum vulgare	cis-acting regulatory element involved in the MeJA-responsiveness
TaPIN15	TGACG-motif	TGACG	1248	5	-	Hordeum vulgare	cis-acting regulatory element involved in the MeJA-responsiveness
TaPIN15	O2-site	GATGA(C/T)(A/G)TG(A/G)	1245	8	-	Zea mays	cis-acting regulatory element involved in zein metabolism regulation
TaPIN15	O2-site	GATGATGTGG	1315	9	-	Zea mays	cis-acting regulatory element involved in zein metabolism regulation
TaPIN15	O2-site	GATGACATGG	1441	9	-	Zea mays	cis-acting regulatory element involved in zein metabolism regulation
TaPIN15	O2-site	GATGACATGG	1457	9	-	Zea mays	cis-acting regulatory element involved in zein metabolism regulation
TaPIN15	O2-site	GATGACATGG	1552	9	-	Zea mays	cis-acting regulatory element involved in zein metabolism regulation
TaPIN15	TCCC-motif	TCTCCCT	1791	7	-	Spinacia oleracea	part of a light responsive element
TaPIN15	MRE	AACCTAA	1681	7	-	Petroselinum crispum	MYB binding site involved in light responsiveness
TaPIN15	CGTCA-motif	CGTCA	116	5	-	Hordeum vulgare	cis-acting regulatory element involved in the MeJA-responsiveness
TaPIN15	CGTCA-motif	CGTCA	1014	5	-	Hordeum vulgare	cis-acting regulatory element involved in the MeJA-responsiveness
TaPIN15	CGTCA-motif	CGTCA	1131	5	-	Hordeum vulgare	cis-acting regulatory element involved in the MeJA-responsiveness
TaPIN15	CGTCA-motif	CGTCA	1248	5	-	Hordeum vulgare	cis-acting regulatory element involved in the MeJA-responsiveness
TaPIN15	LTR	CCGAAA	1416	6	-	Hordeum vulgare	cis-acting element involved in low-temperature responsiveness
TaPIN15	LTR	CCGAAA	1485	6	-	Hordeum vulgare	cis-acting element involved in low-temperature responsiveness
TaPIN15	G-box	TACGTG	915	6	-	Arabidopsis thaliana	cis-acting regulatory element involved in light responsiveness
TaPIN15	G-box	CACGTC	1015	6	-	Zea mays	cis-acting regulatory element involved in light responsiveness
TaPIN15	G-box	CACGTC	1246	6	-	Zea mays	cis-acting regulatory element involved in light responsiveness
TaPIN15	G-box	TACGTG	1389	6	-	Arabidopsis thaliana	cis-acting regulatory element involved in light responsiveness
TaPIN15	G-box	TACGTG	1500	6	-	Arabidopsis thaliana	cis-acting regulatory element involved in light responsiveness
TaPIN15	G-box	TACGTG	1537	6	-	Arabidopsis thaliana	cis-acting regulatory element involved in light responsiveness
TaPIN15	GTGGC-motif	CAGCGTGTGGC	1749	10	-	Hordeum vulgare	part of a light responsive element
TaPIN15	ABRE	ACGTG	915	5	-	Arabidopsis thaliana	cis-acting element involved in the abscisic acid responsiveness
TaPIN15	ABRE	ACGTG	1016	5	-	Arabidopsis thaliana	cis-acting element involved in the abscisic acid responsiveness
TaPIN15	ABRE	ACGTG	1246	5	-	Arabidopsis thaliana	cis-acting element involved in the abscisic acid responsiveness
TaPIN15	ABRE	CGTACGTGCA	1387	9	-	Hordeum vulgare	cis-acting element involved in the abscisic acid responsiveness
TaPIN15	ABRE	ACGTG	1389	5	-	Arabidopsis thaliana	cis-acting element involved in the abscisic acid responsiveness
TaPIN15	ABRE	ACGTG	1500	5	-	Arabidopsis thaliana	cis-acting element involved in the abscisic acid responsiveness
TaPIN15	ABRE	CGTACGTGCA	1535	9	-	Hordeum vulgare	cis-acting element involved in the abscisic acid responsiveness
TaPIN15	ABRE	ACGTG	1537	5	-	Arabidopsis thaliana	cis-acting element involved in the abscisic acid responsiveness
TaPIN15	TGA-element	AACGAC	1065	6	-	Brassica oleracea	auxin-responsive element
TaPIN15	TGA-element	AACGAC	1194	6	-	Brassica oleracea	auxin-responsive element
TaPIN15	ARE	AAACCA	799	6	-	Zea mays	cis-acting regulatory element essential for the anaerobic induction
TaPIN16	ARE	AAACCA	81	6	-	Zea mays	cis-acting regulatory element essential for the anaerobic induction
TaPIN16	ARE	AAACCA	733	6	-	Zea mays	cis-acting regulatory element essential for the anaerobic induction
TaPIN16	G-box	CACGAC	221	6	-	Zea mays	cis-acting regulatory element involved in light responsiveness
TaPIN16	G-box	CACGTC	549	6	-	Zea mays	cis-acting regulatory element involved in light responsiveness
TaPIN16	G-box	CACGTC	682	6	-	Zea mays	cis-acting regulatory element involved in light responsiveness
TaPIN16	G-box	TACGTG	1139	6	-	Arabidopsis thaliana	cis-acting regulatory element involved in light responsiveness
TaPIN16	G-box	TACGTG	1344	6	-	Arabidopsis thaliana	cis-acting regulatory element involved in light responsiveness
TaPIN16	G-box	TACGTG	1379	6	-	Arabidopsis thaliana	cis-acting regulatory element involved in light responsiveness
TaPIN16	GATA-motif	GATAGGG	939	7	-	Pisum sativum	part of a light responsive element
TaPIN16	TCA-element	CCATCTTTTT	894	9	-	Nicotiana tabacum	cis-acting element involved in salicylic acid responsiveness
TaPIN16	ABRE	GCCGCGTGGC	153	9	-	Oryza sativa	cis-acting element involved in the abscisic acid responsiveness
TaPIN16	ABRE	GCCGCGTGGC	427	9	-	Oryza sativa	cis-acting element involved in the abscisic acid responsiveness
TaPIN16	ABRE	ACGTG	550	5	-	Arabidopsis thaliana	cis-acting element involved in the abscisic acid responsiveness
TaPIN16	ABRE	ACGTG	683	5	-	Arabidopsis thaliana	cis-acting element involved in the abscisic acid responsiveness
TaPIN16	ABRE	CGTACGTGCA	1137	9	-	Hordeum vulgare	cis-acting element involved in the abscisic acid responsiveness
TaPIN16	ABRE	ACGTG	1139	5	-	Arabidopsis thaliana	cis-acting element involved in the abscisic acid responsiveness
TaPIN16	ABRE	CGTACGTGCA	1141	9	-	Hordeum vulgare	cis-acting element involved in the abscisic acid responsiveness
TaPIN16	ABRE	CGTACGTGCA	1342	9	-	Hordeum vulgare	cis-acting element involved in the abscisic acid responsiveness
TaPIN16	ABRE	ACGTG	1344	5	-	Arabidopsis thaliana	cis-acting element involved in the abscisic acid responsiveness
TaPIN16	ABRE	CGTACGTGCA	1377	9	-	Hordeum vulgare	cis-acting element involved in the abscisic acid responsiveness
TaPIN16	ABRE	ACGTG	1379	5	-	Arabidopsis thaliana	cis-acting element involved in the abscisic acid responsiveness
TaPIN16	TCCC-motif	TCTCCCT	1024	7	-	Spinacia oleracea	part of a light responsive element
TaPIN16	GC-motif	CCCCCG	69	6	-	Zea mays	enhancer-like element involved in anoxic specific inducibility
TaPIN16	GC-motif	CCCCCG	650	6	-	Zea mays	enhancer-like element involved in anoxic specific inducibility
TaPIN16	GC-motif	CCCCCG	1868	6	-	Zea mays	enhancer-like element involved in anoxic specific inducibility
TaPIN16	I-box	GTATAAGGCC	961	9	-	Larix laricina	part of a light responsive element
TaPIN16	CGTCA-motif	CGTCA	55	5	-	Hordeum vulgare	cis-acting regulatory element involved in the MeJA-responsiveness
TaPIN16	CGTCA-motif	CGTCA	131	5	-	Hordeum vulgare	cis-acting regulatory element involved in the MeJA-responsiveness
TaPIN16	CGTCA-motif	CGTCA	148	5	-	Hordeum vulgare	cis-acting regulatory element involved in the MeJA-responsiveness
TaPIN16	CGTCA-motif	CGTCA	370	5	-	Hordeum vulgare	cis-acting regulatory element involved in the MeJA-responsiveness
TaPIN16	CGTCA-motif	CGTCA	487	5	-	Hordeum vulgare	cis-acting regulatory element involved in the MeJA-responsiveness
TaPIN16	CGTCA-motif	CGTCA	987	5	-	Hordeum vulgare	cis-acting regulatory element involved in the MeJA-responsiveness
TaPIN16	CGTCA-motif	CGTCA	1085	5	-	Hordeum vulgare	cis-acting regulatory element involved in the MeJA-responsiveness
TaPIN16	CGTCA-motif	CGTCA	1274	5	-	Hordeum vulgare	cis-acting regulatory element involved in the MeJA-responsiveness
TaPIN16	Sp1	GGGCGG	73	6	-	Oryza sativa	light responsive element
TaPIN16	Sp1	GGGCGG	107	6	-	Oryza sativa	light responsive element
TaPIN16	Sp1	GGGCGG	454	6	-	Oryza sativa	light responsive element
TaPIN16	Sp1	GGGCGG	664	6	-	Oryza sativa	light responsive element
TaPIN16	Sp1	GGGCGG	669	6	-	Oryza sativa	light responsive element
TaPIN16	Sp1	GGGCGG	782	6	-	Oryza sativa	light responsive element
TaPIN16	Sp1	GGGCGG	1228	6	-	Oryza sativa	light responsive element
TaPIN16	TGACG-motif	TGACG	55	5	-	Hordeum vulgare	cis-acting regulatory element involved in the MeJA-responsiveness
TaPIN16	TGACG-motif	TGACG	131	5	-	Hordeum vulgare	cis-acting regulatory element involved in the MeJA-responsiveness
TaPIN16	TGACG-motif	TGACG	148	5	-	Hordeum vulgare	cis-acting regulatory element involved in the MeJA-responsiveness
TaPIN16	TGACG-motif	TGACG	370	5	-	Hordeum vulgare	cis-acting regulatory element involved in the MeJA-responsiveness
TaPIN16	TGACG-motif	TGACG	487	5	-	Hordeum vulgare	cis-acting regulatory element involved in the MeJA-responsiveness
TaPIN16	TGACG-motif	TGACG	987	5	-	Hordeum vulgare	cis-acting regulatory element involved in the MeJA-responsiveness
TaPIN16	TGACG-motif	TGACG	1085	5	-	Hordeum vulgare	cis-acting regulatory element involved in the MeJA-responsiveness
TaPIN16	TGACG-motif	TGACG	1274	5	-	Hordeum vulgare	cis-acting regulatory element involved in the MeJA-responsiveness
TaPIN17	Sp1	GGGCGG	388	6	-	Oryza sativa	light responsive element
TaPIN17	Sp1	GGGCGG	1420	6	-	Oryza sativa	light responsive element
TaPIN17	G-box	TACGTG	13	6	-	Arabidopsis thaliana	cis-acting regulatory element involved in light responsiveness
TaPIN17	G-box	CACGTC	236	6	-	Zea mays	cis-acting regulatory element involved in light responsiveness
TaPIN17	G-box	TACGTG	1174	6	-	Arabidopsis thaliana	cis-acting regulatory element involved in light responsiveness
TaPIN17	GARE-motif	TCTGTTG	1019	7	-	Brassica oleracea	gibberellin-responsive element
TaPIN17	TGA-element	AACGAC	458	6	-	Brassica oleracea	auxin-responsive element
TaPIN17	CGTCA-motif	CGTCA	169	5	-	Hordeum vulgare	cis-acting regulatory element involved in the MeJA-responsiveness
TaPIN17	CGTCA-motif	CGTCA	238	5	-	Hordeum vulgare	cis-acting regulatory element involved in the MeJA-responsiveness
TaPIN17	CGTCA-motif	CGTCA	558	5	-	Hordeum vulgare	cis-acting regulatory element involved in the MeJA-responsiveness
TaPIN17	CGTCA-motif	CGTCA	907	5	-	Hordeum vulgare	cis-acting regulatory element involved in the MeJA-responsiveness
TaPIN17	TGACG-motif	TGACG	169	5	-	Hordeum vulgare	cis-acting regulatory element involved in the MeJA-responsiveness
TaPIN17	TGACG-motif	TGACG	238	5	-	Hordeum vulgare	cis-acting regulatory element involved in the MeJA-responsiveness
TaPIN17	TGACG-motif	TGACG	558	5	-	Hordeum vulgare	cis-acting regulatory element involved in the MeJA-responsiveness
TaPIN17	TGACG-motif	TGACG	907	5	-	Hordeum vulgare	cis-acting regulatory element involved in the MeJA-responsiveness
TaPIN17	P-box	CCTTTTG	99	7	-	Oryza sativa	gibberellin-responsive element
TaPIN17	TCT-motif	TCTTAC	1882	6	-	Arabidopsis thaliana	part of a light responsive element
TaPIN17	ABRE	ACGTG	13	5	-	Arabidopsis thaliana	cis-acting element involved in the abscisic acid responsiveness
TaPIN17	ABRE	ACGTG	236	5	-	Arabidopsis thaliana	cis-acting element involved in the abscisic acid responsiveness
TaPIN17	ABRE	CGTACGTGCA	1172	9	-	Hordeum vulgare	cis-acting element involved in the abscisic acid responsiveness
TaPIN17	ABRE	ACGTG	1174	5	-	Arabidopsis thaliana	cis-acting element involved in the abscisic acid responsiveness
TaPIN17	GC-motif	CCCCCG	1826	6	-	Zea mays	enhancer-like element involved in anoxic specific inducibility
TaPIN18	Sp1	GGGCGG	610	6	-	Oryza sativa	light responsive element
TaPIN18	Sp1	GGGCGG	1486	6	-	Oryza sativa	light responsive element
TaPIN18	Gap-box	CAAATGAA(A/G)A	295	9.5	-	Arabidopsis thaliana	part of a light responsive element
TaPIN18	TGA-element	AACGAC	334	6	-	Brassica oleracea	auxin-responsive element
TaPIN18	TCA-element	CCATCTTTTT	6	10	-	Nicotiana tabacum	cis-acting element involved in salicylic acid responsiveness
TaPIN18	TGACG-motif	TGACG	378	5	-	Hordeum vulgare	cis-acting regulatory element involved in the MeJA-responsiveness
TaPIN18	TGACG-motif	TGACG	457	5	-	Hordeum vulgare	cis-acting regulatory element involved in the MeJA-responsiveness
TaPIN18	TGACG-motif	TGACG	656	5	-	Hordeum vulgare	cis-acting regulatory element involved in the MeJA-responsiveness
TaPIN18	ABRE	ACGTG	25	5	-	Arabidopsis thaliana	cis-acting element involved in the abscisic acid responsiveness
TaPIN18	ABRE	ACGTG	196	5	-	Arabidopsis thaliana	cis-acting element involved in the abscisic acid responsiveness
TaPIN18	ABRE	CGTACGTGCA	509	9	-	Hordeum vulgare	cis-acting element involved in the abscisic acid responsiveness
TaPIN18	ABRE	ACGTG	511	5	-	Arabidopsis thaliana	cis-acting element involved in the abscisic acid responsiveness
TaPIN18	ABRE	CGTACGTGCA	513	9	-	Hordeum vulgare	cis-acting element involved in the abscisic acid responsiveness
TaPIN18	ABRE	CGTACGTGCA	809	9	-	Hordeum vulgare	cis-acting element involved in the abscisic acid responsiveness
TaPIN18	ABRE	ACGTG	811	5	-	Arabidopsis thaliana	cis-acting element involved in the abscisic acid responsiveness
TaPIN18	TCT-motif	TCTTAC	1904	6	-	Arabidopsis thaliana	part of a light responsive element
TaPIN18	circadian	CAAAGATATC	1287	9	-	Lycopersicon esculentum	cis-acting regulatory element involved in circadian control
TaPIN18	ARE	AAACCA	217	6	-	Zea mays	cis-acting regulatory element essential for the anaerobic induction
TaPIN18	CGTCA-motif	CGTCA	378	5	-	Hordeum vulgare	cis-acting regulatory element involved in the MeJA-responsiveness
TaPIN18	CGTCA-motif	CGTCA	457	5	-	Hordeum vulgare	cis-acting regulatory element involved in the MeJA-responsiveness
TaPIN18	CGTCA-motif	CGTCA	656	5	-	Hordeum vulgare	cis-acting regulatory element involved in the MeJA-responsiveness
TaPIN18	ATCT-motif	AATCTAATCC	1263	9	-	Pisum sativum	part of a conserved DNA module involved in light responsiveness
TaPIN18	G-box	CCACGTAA	23	8	-	Brassica napus	cis-acting regulatory element involved in light responsiveness
TaPIN18	G-box	TACGTG	24	6	-	Arabidopsis thaliana	cis-acting regulatory element involved in light responsiveness
TaPIN18	G-box	CACGTC	195	6	-	Zea mays	cis-acting regulatory element involved in light responsiveness
TaPIN18	G-box	TACGTG	511	6	-	Arabidopsis thaliana	cis-acting regulatory element involved in light responsiveness
TaPIN18	G-box	TACGTG	811	6	-	Arabidopsis thaliana	cis-acting regulatory element involved in light responsiveness
TaPIN18	TC-rich repeats	ATTCTCTAAC	1608	9	-	Nicotiana tabacum	cis-acting element involved in defense and stress responsiveness
TaPIN18	TCCC-motif	TCTCCCT	408	7	-	Spinacia oleracea	part of a light responsive element
TaPIN18	TCCC-motif	TCTCCCT	1465	7	-	Spinacia oleracea	part of a light responsive element
TaPIN18	TCCC-motif	TCTCCCT	1918	7	-	Spinacia oleracea	part of a light responsive element
TaPIN18	GATT-motif	CTCCTGATTGGA	1295	11	-	Oryza sativa	part of a light responsive element
TaPIN19	O2-site	GATGATGTGG	431	9	+	Zea mays	cis-acting regulatory element involved in zein metabolism regulation
TaPIN19	O2-site	GTTGACGTGA	1646	9	+	Zea mays	cis-acting regulatory element involved in zein metabolism regulation
TaPIN19	GT1-motif	GGTTAA	929	6	+	Arabidopsis thaliana	light responsive element
TaPIN19	LTR	CCGAAA	1937	6	+	Hordeum vulgare	cis-acting element involved in low-temperature responsiveness
TaPIN19	ACA-motif	AATTACAGCCATT	1185	12	+	Pisum sativum	part of gapA in (gapA-CMA1) involved with light responsiveness
TaPIN19	ATCT-motif	AATCTAATCC	79	9	+	Pisum sativum	part of a conserved DNA module involved in light responsiveness
TaPIN19	Sp1	GGGCGG	1707	6	+	Oryza sativa	light responsive element
TaPIN19	ABRE	ACGTG	1650	5	+	Arabidopsis thaliana	cis-acting element involved in the abscisic acid responsiveness
TaPIN19	P-box	CCTTTTG	846	7	+	Oryza sativa	gibberellin-responsive element
TaPIN19	P-box	CCTTTTG	1120	7	+	Oryza sativa	gibberellin-responsive element
TaPIN19	AE-box	AGAAACAA	1124	8	+	Arabidopsis thaliana	part of a module for light response
TaPIN19	TCCC-motif	TCTCCCT	1734	7	+	Spinacia oleracea	part of a light responsive element
TaPIN19	Box 4	ATTAAT	1551	6	+	Petroselinum crispum	part of a conserved DNA module involved in light responsiveness
TaPIN19	CAT-box	GCCACT	452	6	+	Arabidopsis thaliana	cis-acting regulatory element related to meristem expression
TaPIN19	CAT-box	GCCACT	965	6	+	Arabidopsis thaliana	cis-acting regulatory element related to meristem expression
TaPIN19	CAT-box	GCCACT	1026	6	+	Arabidopsis thaliana	cis-acting regulatory element related to meristem expression
TaPIN19	CGTCA-motif	CGTCA	130	5	+	Hordeum vulgare	cis-acting regulatory element involved in the MeJA-responsiveness
TaPIN19	CGTCA-motif	CGTCA	1070	5	+	Hordeum vulgare	cis-acting regulatory element involved in the MeJA-responsiveness
TaPIN19	CGTCA-motif	CGTCA	1091	5	+	Hordeum vulgare	cis-acting regulatory element involved in the MeJA-responsiveness
TaPIN19	CGTCA-motif	CGTCA	1648	5	+	Hordeum vulgare	cis-acting regulatory element involved in the MeJA-responsiveness
TaPIN19	TCA-element	CCATCTTTTT	378	9	+	Nicotiana tabacum	cis-acting element involved in salicylic acid responsiveness
TaPIN19	RY-element	CATGCATG	1571	8	+	Helianthus annuus	cis-acting regulatory element involved in seed-specific regulation
TaPIN19	RY-element	CATGCATG	1885	8	+	Helianthus annuus	cis-acting regulatory element involved in seed-specific regulation
TaPIN19	MBS	CAACTG	1893	6	+	Arabidopsis thaliana	MYB binding site involved in drought-inducibility
TaPIN19	G-box	CACGTC	1649	6	+	Zea mays	cis-acting regulatory element involved in light responsiveness
TaPIN19	ATC-motif	AGTAATCT	1320	8	+	Spinacia oleracea	part of a conserved DNA module involved in light responsiveness
TaPIN19	TCT-motif	TCTTAC	1832	6	+	Arabidopsis thaliana	part of a light responsive element
TaPIN19	TGACG-motif	TGACG	130	5	+	Hordeum vulgare	cis-acting regulatory element involved in the MeJA-responsiveness
TaPIN19	TGACG-motif	TGACG	1070	5	+	Hordeum vulgare	cis-acting regulatory element involved in the MeJA-responsiveness
TaPIN19	TGACG-motif	TGACG	1091	5	+	Hordeum vulgare	cis-acting regulatory element involved in the MeJA-responsiveness
TaPIN19	TGACG-motif	TGACG	1648	5	+	Hordeum vulgare	cis-acting regulatory element involved in the MeJA-responsiveness
TaPIN19	ARE	AAACCA	84	6	+	Zea mays	cis-acting regulatory element essential for the anaerobic induction
TaPIN19	ARE	AAACCA	375	6	+	Zea mays	cis-acting regulatory element essential for the anaerobic induction
TaPIN20	CAT-box	GCCACT	1332	6	+	Arabidopsis thaliana	cis-acting regulatory element related to meristem expression
TaPIN20	G-Box	CACGTG	1004	6	+	Pisum sativum	cis-acting regulatory element involved in light responsiveness
TaPIN20	O2-site	GATGATGTGG	1027	9	+	Zea mays	cis-acting regulatory element involved in zein metabolism regulation
TaPIN20	TCA-element	CCATCTTTTT	1476	9	+	Nicotiana tabacum	cis-acting element involved in salicylic acid responsiveness
TaPIN20	TGACG-motif	TGACG	1233	5	+	Hordeum vulgare	cis-acting regulatory element involved in the MeJA-responsiveness
TaPIN20	CGTCA-motif	CGTCA	1233	5	+	Hordeum vulgare	cis-acting regulatory element involved in the MeJA-responsiveness
TaPIN20	I-box	cGATAAGGCG	303	9	+	Zea mays	part of a light responsive element
TaPIN20	I-box	cGATAAGGCG	1386	9	+	Zea mays	part of a light responsive element
TaPIN20	CCAAT-box	CAACGG	1780	6	+	Hordeum vulgare	MYBHv1 binding site
TaPIN20	ARE	AAACCA	1962	6	+	Zea mays	cis-acting regulatory element essential for the anaerobic induction
TaPIN20	GC-motif	CCCCCG	1060	6	+	Zea mays	enhancer-like element involved in anoxic specific inducibility
TaPIN20	ABRE	CACGTG	1004	6	+	Arabidopsis thaliana	cis-acting element involved in the abscisic acid responsiveness
TaPIN20	ABRE	ACGTG	1005	5	+	Arabidopsis thaliana	cis-acting element involved in the abscisic acid responsiveness
TaPIN20	G-box	CACGAC	23	6	+	Zea mays	cis-acting regulatory element involved in light responsiveness
TaPIN20	G-box	CACGTG	1004	6	+	Arabidopsis thaliana	cis-acting regulatory element involved in light responsiveness
TaPIN20	P-box	CCTTTTG	587	7	+	Oryza sativa	gibberellin-responsive element
TaPIN20	Sp1	GGGCGG	795	6	+	Oryza sativa	light responsive element
TaPIN20	Sp1	GGGCGG	1784	6	+	Oryza sativa	light responsive element
TaPIN20	Sp1	GGGCGG	1788	6	+	Oryza sativa	light responsive element
TaPIN21	TGA-element	AACGAC	1848	6	+	Brassica oleracea	auxin-responsive element
TaPIN21	TGACG-motif	TGACG	1231	5	+	Hordeum vulgare	cis-acting regulatory element involved in the MeJA-responsiveness
TaPIN21	CAT-box	GCCACT	1538	6	+	Arabidopsis thaliana	cis-acting regulatory element related to meristem expression
TaPIN21	GT1-motif	GGTTAA	1625	6	+	Arabidopsis thaliana	light responsive element
TaPIN21	GT1-motif	GGTTAA	1915	6	+	Arabidopsis thaliana	light responsive element
TaPIN21	ATCT-motif	AATCTAATCC	520	9	+	Pisum sativum	part of a conserved DNA module involved in light responsiveness
TaPIN21	G-Box	CACGTT	74	6	+	Pisum sativum	cis-acting regulatory element involved in light responsiveness
TaPIN21	G-Box	CACGTT	610	6	+	Pisum sativum	cis-acting regulatory element involved in light responsiveness
TaPIN21	Box 4	ATTAAT	1571	6	+	Petroselinum crispum	part of a conserved DNA module involved in light responsiveness
TaPIN21	G-box	CACGAC	536	6	+	Zea mays	cis-acting regulatory element involved in light responsiveness
TaPIN21	CGTCA-motif	CGTCA	1231	5	+	Hordeum vulgare	cis-acting regulatory element involved in the MeJA-responsiveness
TaPIN21	chs-CMA1a	TTACTTAA	573	8	+	Daucus carota	part of a light responsive element
TaPIN21	CCAAT-box	CAACGG	147	6	+	Hordeum vulgare	MYBHv1 binding site
TaPIN21	CCAAT-box	CAACGG	1809	6	+	Hordeum vulgare	MYBHv1 binding site
TaPIN21	ABRE	ACGTG	75	5	+	Arabidopsis thaliana	cis-acting element involved in the abscisic acid responsiveness
TaPIN21	ABRE	ACGTG	611	5	+	Arabidopsis thaliana	cis-acting element involved in the abscisic acid responsiveness
TaPIN22	circadian	CAAAGATATC	169	9	-	Lycopersicon esculentum	cis-acting regulatory element involved in circadian control
TaPIN22	O2-site	GATGATGTGG	77	9	-	Zea mays	cis-acting regulatory element involved in zein metabolism regulation
TaPIN22	O2-site	GATGACATGG	836	9	-	Zea mays	cis-acting regulatory element involved in zein metabolism regulation
TaPIN22	ABRE	ACGTG	69	5	-	Arabidopsis thaliana	cis-acting element involved in the abscisic acid responsiveness
TaPIN22	ABRE	ACGTG	546	5	-	Arabidopsis thaliana	cis-acting element involved in the abscisic acid responsiveness
TaPIN22	ABRE	ACGTG	803	5	-	Arabidopsis thaliana	cis-acting element involved in the abscisic acid responsiveness
TaPIN22	ABRE	ACGTG	1651	5	-	Arabidopsis thaliana	cis-acting element involved in the abscisic acid responsiveness
TaPIN22	TCCC-motif	TCTCCCT	102	7	-	Spinacia oleracea	part of a light responsive element
TaPIN22	TCCC-motif	TCTCCCT	344	7	-	Spinacia oleracea	part of a light responsive element
TaPIN22	TCCC-motif	TCTCCCT	1735	7	-	Spinacia oleracea	part of a light responsive element
TaPIN22	Sp1	GGGCGG	1708	6	-	Oryza sativa	light responsive element
TaPIN22	ATC-motif	AGTAATCT	1227	8	-	Spinacia oleracea	part of a conserved DNA module involved in light responsiveness
TaPIN22	RY-element	CATGCATG	1440	8	-	Helianthus annuus	cis-acting regulatory element involved in seed-specific regulation
TaPIN22	RY-element	CATGCATG	1886	8	-	Helianthus annuus	cis-acting regulatory element involved in seed-specific regulation
TaPIN22	G-box	CACGTC	68	6	-	Zea mays	cis-acting regulatory element involved in light responsiveness
TaPIN22	G-box	TACGTG	546	6	-	Arabidopsis thaliana	cis-acting regulatory element involved in light responsiveness
TaPIN22	G-box	CACGTC	1650	6	-	Zea mays	cis-acting regulatory element involved in light responsiveness
TaPIN22	LTR	CCGAAA	1937	6	-	Hordeum vulgare	cis-acting element involved in low-temperature responsiveness
TaPIN22	GA-motif	ATAGATAA	580	8	-	Arabidopsis thaliana	part of a light responsive element
TaPIN22	AE-box	AGAAACAA	758	8	-	Arabidopsis thaliana	part of a module for light response
TaPIN22	Box 4	ATTAAT	1420	6	-	Petroselinum crispum	part of a conserved DNA module involved in light responsiveness
TaPIN22	TATC-box	TATCCCA	905	7	-	Oryza sativa	cis-acting element involved in gibberellin-responsiveness
TaPIN22	G-Box	CACGTT	802	6	-	Pisum sativum	cis-acting regulatory element involved in light responsiveness
TaPIN22	I-box	AAGATAAGGCT	576	10	-	Gossypium hirsutum	part of a light responsive element
TaPIN22	I-box	AGATAAGG	578	8	-	Triticum aestivum	part of a light responsive element
TaPIN22	MBS	CAACTG	24	6	-	Arabidopsis thaliana	MYB binding site involved in drought-inducibility
TaPIN22	MBS	CAACTG	1894	6	-	Arabidopsis thaliana	MYB binding site involved in drought-inducibility
TaPIN22	TCT-motif	TCTTAC	1833	6	-	Arabidopsis thaliana	part of a light responsive element
TaPIN23	CGTCA-motif	CGTCA	1727	5	+	Hordeum vulgare	cis-acting regulatory element involved in the MeJA-responsiveness
TaPIN23	CCAAT-box	CAACGG	572	6	+	Hordeum vulgare	MYBHv1 binding site
TaPIN23	L-box	ATCCCACCTAC	351	10	+	Petroselinum crispum	part of a light responsive element
TaPIN23	TCA-element	TCAGAAGAGG	147	9	+	Brassica oleracea	cis-acting element involved in salicylic acid responsiveness
TaPIN23	ABRE	AACCCGG	106	7	+	Arabidopsis thaliana	cis-acting element involved in the abscisic acid responsiveness
TaPIN23	ABRE	TACGGTC	549	7	+	Arabidopsis thaliana	cis-acting element involved in the abscisic acid responsiveness
TaPIN23	ABRE	ACGTG	877	5	+	Arabidopsis thaliana	cis-acting element involved in the abscisic acid responsiveness
TaPIN23	ABRE	ACGTG	1725	5	+	Arabidopsis thaliana	cis-acting element involved in the abscisic acid responsiveness
TaPIN23	AACA_motif	TAACAAACTCCA	181	11	+	Oryza sativa	involved in endosperm-specific negative expression
TaPIN23	G-box	TACGTG	876	6	+	Arabidopsis thaliana	cis-acting regulatory element involved in light responsiveness
TaPIN23	G-box	CACGTC	1725	6	+	Zea mays	cis-acting regulatory element involved in light responsiveness
TaPIN23	G-box	CACGAC	1847	6	+	Zea mays	cis-acting regulatory element involved in light responsiveness
TaPIN23	TCT-motif	TCTTAC	738	6	+	Arabidopsis thaliana	part of a light responsive element
TaPIN23	LTR	CCGAAA	435	6	+	Hordeum vulgare	cis-acting element involved in low-temperature responsiveness
TaPIN23	LTR	CCGAAA	563	6	+	Hordeum vulgare	cis-acting element involved in low-temperature responsiveness
TaPIN23	CAT-box	GCCACT	282	6	+	Arabidopsis thaliana	cis-acting regulatory element related to meristem expression
TaPIN23	MRE	AACCTAA	997	7	+	Petroselinum crispum	MYB binding site involved in light responsiveness
TaPIN23	TGACG-motif	TGACG	1727	5	+	Hordeum vulgare	cis-acting regulatory element involved in the MeJA-responsiveness
TaPIN23	Sp1	GGGCGG	592	6	+	Oryza sativa	light responsive element
TaPIN23	Sp1	GGGCGG	730	6	+	Oryza sativa	light responsive element
TaPIN23	Sp1	GGGCGG	1343	6	+	Oryza sativa	light responsive element
TaPIN23	GT1-motif	GGTTAA	1858	6	+	Arabidopsis thaliana	light responsive element
TaPIN23	O2-site	GATGATGTGG	817	9	+	Zea mays	cis-acting regulatory element involved in zein metabolism regulation
TaPIN23	TATC-box	TATCCCA	1619	7	+	Oryza sativa	cis-acting element involved in gibberellin-responsiveness
TaPIN24	I-box	GTATAAGGCC	647	9	+	Larix laricina	part of a light responsive element
TaPIN24	GT1-motif	GGTTAA	927	6	+	Arabidopsis thaliana	light responsive element
TaPIN24	TCA-element	CCATCTTTTT	475	9	+	Nicotiana tabacum	cis-acting element involved in salicylic acid responsiveness
TaPIN24	ARE	AAACCA	1962	6	+	Zea mays	cis-acting regulatory element essential for the anaerobic induction
TaPIN24	O2-site	GATGACATGG	757	10	+	Zea mays	cis-acting regulatory element involved in zein metabolism regulation
TaPIN24	G-Box	CACGTG	55	6	+	Pisum sativum	cis-acting regulatory element involved in light responsiveness
TaPIN24	ATC-motif	AGCTATCCA	450	9	+	Arabidopsis thaliana	part of a conserved DNA module involved in light responsiveness
TaPIN24	CGTCA-motif	CGTCA	689	5	+	Hordeum vulgare	cis-acting regulatory element involved in the MeJA-responsiveness
TaPIN24	CGTCA-motif	CGTCA	736	5	+	Hordeum vulgare	cis-acting regulatory element involved in the MeJA-responsiveness
TaPIN24	TCT-motif	TCTTAC	1458	6	+	Arabidopsis thaliana	part of a light responsive element
TaPIN24	Box 4	ATTAAT	340	6	+	Petroselinum crispum	part of a conserved DNA module involved in light responsiveness
TaPIN24	G-box	CACGTG	55	6	+	Arabidopsis thaliana	cis-acting regulatory element involved in light responsiveness
TaPIN24	G-box	TACGTG	63	6	+	Arabidopsis thaliana	cis-acting regulatory element involved in light responsiveness
TaPIN24	G-box	CACGAC	181	6	+	Zea mays	cis-acting regulatory element involved in light responsiveness
TaPIN24	G-box	CACGTC	737	6	+	Zea mays	cis-acting regulatory element involved in light responsiveness
TaPIN24	CAT-box	GCCACT	252	6	+	Arabidopsis thaliana	cis-acting regulatory element related to meristem expression
TaPIN24	CAT-box	GCCACT	405	6	+	Arabidopsis thaliana	cis-acting regulatory element related to meristem expression
TaPIN24	CAT-box	GCCACT	1630	6	+	Arabidopsis thaliana	cis-acting regulatory element related to meristem expression
TaPIN24	CAT-box	GCCACT	1823	6	+	Arabidopsis thaliana	cis-acting regulatory element related to meristem expression
TaPIN24	ABRE	CACGTG	55	6	+	Arabidopsis thaliana	cis-acting element involved in the abscisic acid responsiveness
TaPIN24	ABRE	ACGTG	56	5	+	Arabidopsis thaliana	cis-acting element involved in the abscisic acid responsiveness
TaPIN24	ABRE	ACGTG	64	5	+	Arabidopsis thaliana	cis-acting element involved in the abscisic acid responsiveness
TaPIN24	ABRE	ACGTG	738	5	+	Arabidopsis thaliana	cis-acting element involved in the abscisic acid responsiveness
TaPIN24	TGACG-motif	TGACG	689	5	+	Hordeum vulgare	cis-acting regulatory element involved in the MeJA-responsiveness
TaPIN24	TGACG-motif	TGACG	736	5	+	Hordeum vulgare	cis-acting regulatory element involved in the MeJA-responsiveness
TaPIN25	G-Box	CACGTT	458	6	+	Pisum sativum	cis-acting regulatory element involved in light responsiveness
TaPIN25	G-Box	CACGTT	1157	6	+	Pisum sativum	cis-acting regulatory element involved in light responsiveness
TaPIN25	G-box	CACGTC	1479	6	+	Zea mays	cis-acting regulatory element involved in light responsiveness
TaPIN25	G-box	CACGTC	1626	6	+	Zea mays	cis-acting regulatory element involved in light responsiveness
TaPIN25	Sp1	GGGCGG	1360	6	+	Oryza sativa	light responsive element
TaPIN25	MBS	CAACTG	926	6	+	Arabidopsis thaliana	MYB binding site involved in drought-inducibility
TaPIN25	ARE	AAACCA	1966	6	+	Zea mays	cis-acting regulatory element essential for the anaerobic induction
TaPIN25	CGTCA-motif	CGTCA	1844	5	+	Hordeum vulgare	cis-acting regulatory element involved in the MeJA-responsiveness
TaPIN25	GATA-motif	AAGATAAGATT	581	10	+	Arabidopsis thaliana	part of a light responsive element
TaPIN25	TCT-motif	TCTTAC	441	6	+	Arabidopsis thaliana	part of a light responsive element
TaPIN25	LTR	CCGAAA	1697	6	+	Hordeum vulgare	cis-acting element involved in low-temperature responsiveness
TaPIN25	CAT-box	GCCACT	513	6	+	Arabidopsis thaliana	cis-acting regulatory element related to meristem expression
TaPIN25	CAT-box	GCCACT	973	6	+	Arabidopsis thaliana	cis-acting regulatory element related to meristem expression
TaPIN25	CAT-box	GCCACT	1613	6	+	Arabidopsis thaliana	cis-acting regulatory element related to meristem expression
TaPIN25	AE-box	AGAAACTT	1751	8	+	Arabidopsis thaliana	part of a module for light response
TaPIN25	TCA-element	TCAGAAGAGG	1004	9	+	Brassica oleracea	cis-acting element involved in salicylic acid responsiveness
TaPIN25	TGA-element	AACGAC	991	6	+	Brassica oleracea	auxin-responsive element
TaPIN25	TGA-element	AACGAC	1072	6	+	Brassica oleracea	auxin-responsive element
TaPIN25	3-AF1 binding site	TAAGAGAGGAA	293	10	+	Solanum tuberosum	light responsive element
TaPIN25	TGACG-motif	TGACG	1844	5	+	Hordeum vulgare	cis-acting regulatory element involved in the MeJA-responsiveness
TaPIN25	ABRE	ACGTG	458	5	+	Arabidopsis thaliana	cis-acting element involved in the abscisic acid responsiveness
TaPIN25	ABRE	ACGTG	1157	5	+	Arabidopsis thaliana	cis-acting element involved in the abscisic acid responsiveness
TaPIN25	ABRE	CGCACGTGTC	1477	9	+	Hordeum vulgare	cis-acting element involved in the abscisic acid responsiveness
TaPIN25	ABRE	ACGTG	1479	5	+	Arabidopsis thaliana	cis-acting element involved in the abscisic acid responsiveness
TaPIN25	ABRE	ACGTG	1627	5	+	Arabidopsis thaliana	cis-acting element involved in the abscisic acid responsiveness
TaPIN25	AuxRR-core	GGTCCAT	806	7	+	Nicotiana tabacum	cis-acting regulatory element involved in auxin responsiveness
TaPIN25	circadian	CAAAGATATC	314	9	+	Lycopersicon esculentum	cis-acting regulatory element involved in circadian control
TaPIN25	circadian	CAAAGATATC	1765	9	+	Lycopersicon esculentum	cis-acting regulatory element involved in circadian control
TaPIN26	O2-site	GATGATGTGG	76	9	-	Zea mays	cis-acting regulatory element involved in zein metabolism regulation
TaPIN26	O2-site	GATGACATGG	1081	9	-	Zea mays	cis-acting regulatory element involved in zein metabolism regulation
TaPIN26	O2-site	GATGATGTGG	1217	9	-	Zea mays	cis-acting regulatory element involved in zein metabolism regulation
TaPIN26	MBS	CAACTG	1885	6	-	Arabidopsis thaliana	MYB binding site involved in drought-inducibility
TaPIN26	TCA-element	CCATCTTTTT	23	9	-	Nicotiana tabacum	cis-acting element involved in salicylic acid responsiveness
TaPIN26	TCT-motif	TCTTAC	1824	6	-	Arabidopsis thaliana	part of a light responsive element
TaPIN26	RY-element	CATGCATG	1560	8	-	Helianthus annuus	cis-acting regulatory element involved in seed-specific regulation
TaPIN26	RY-element	CATGCATG	1877	8	-	Helianthus annuus	cis-acting regulatory element involved in seed-specific regulation
TaPIN26	P-box	CCTTTTG	244	7	-	Oryza sativa	gibberellin-responsive element
TaPIN26	P-box	CCTTTTG	562	7	-	Oryza sativa	gibberellin-responsive element
TaPIN26	P-box	CCTTTTG	830	7	-	Oryza sativa	gibberellin-responsive element
TaPIN26	Sp1	GGGCGG	1696	6	-	Oryza sativa	light responsive element
TaPIN26	ATC-motif	AGTAATCT	1370	8	-	Spinacia oleracea	part of a conserved DNA module involved in light responsiveness
TaPIN26	ATC-motif	AGTAATCT	1442	8	-	Spinacia oleracea	part of a conserved DNA module involved in light responsiveness
TaPIN26	Box 4	ATTAAT	1540	6	-	Petroselinum crispum	part of a conserved DNA module involved in light responsiveness
TaPIN26	CGTCA-motif	CGTCA	794	5	-	Hordeum vulgare	cis-acting regulatory element involved in the MeJA-responsiveness
TaPIN26	CGTCA-motif	CGTCA	1196	5	-	Hordeum vulgare	cis-acting regulatory element involved in the MeJA-responsiveness
TaPIN26	CGTCA-motif	CGTCA	1205	5	-	Hordeum vulgare	cis-acting regulatory element involved in the MeJA-responsiveness
TaPIN26	LTR	CCGAAA	1928	6	-	Hordeum vulgare	cis-acting element involved in low-temperature responsiveness
TaPIN26	G-box	CACGAC	50	6	-	Zea mays	cis-acting regulatory element involved in light responsiveness
TaPIN26	TCCC-motif	TCTCCCT	1726	7	-	Spinacia oleracea	part of a light responsive element
TaPIN26	ACE	CTAACGTATT	1008	9	-	Petroselinum crispum	cis-acting element involved in light responsiveness
TaPIN26	ARE	AAACCA	20	6	-	Zea mays	cis-acting regulatory element essential for the anaerobic induction
TaPIN26	CAT-box	GCCACT	97	6	-	Arabidopsis thaliana	cis-acting regulatory element related to meristem expression
TaPIN26	CAT-box	GCCACT	729	6	-	Arabidopsis thaliana	cis-acting regulatory element related to meristem expression
TaPIN26	TGACG-motif	TGACG	794	5	-	Hordeum vulgare	cis-acting regulatory element involved in the MeJA-responsiveness
TaPIN26	TGACG-motif	TGACG	1196	5	-	Hordeum vulgare	cis-acting regulatory element involved in the MeJA-responsiveness
TaPIN26	TGACG-motif	TGACG	1205	5	-	Hordeum vulgare	cis-acting regulatory element involved in the MeJA-responsiveness
TaPIN27	TCCC-motif	TCTCCCT	1506	7	+	Spinacia oleracea	part of a light responsive element
TaPIN27	CGTCA-motif	CGTCA	1437	5	+	Hordeum vulgare	cis-acting regulatory element involved in the MeJA-responsiveness
TaPIN27	TGA-element	AACGAC	979	6	+	Brassica oleracea	auxin-responsive element
TaPIN27	CAT-box	GCCACT	605	6	+	Arabidopsis thaliana	cis-acting regulatory element related to meristem expression
TaPIN27	CAT-box	GCCACT	647	6	+	Arabidopsis thaliana	cis-acting regulatory element related to meristem expression
TaPIN27	CAT-box	GCCACT	677	6	+	Arabidopsis thaliana	cis-acting regulatory element related to meristem expression
TaPIN27	CAT-box	GCCACT	706	6	+	Arabidopsis thaliana	cis-acting regulatory element related to meristem expression
TaPIN27	CAT-box	GCCACT	908	6	+	Arabidopsis thaliana	cis-acting regulatory element related to meristem expression
TaPIN27	CAT-box	GCCACT	938	6	+	Arabidopsis thaliana	cis-acting regulatory element related to meristem expression
TaPIN27	CAT-box	GCCACT	1845	6	+	Arabidopsis thaliana	cis-acting regulatory element related to meristem expression
TaPIN27	TC-rich repeats	GTTTTCTTAC	1729	9	+	Nicotiana tabacum	cis-acting element involved in defense and stress responsiveness
TaPIN27	P-box	CCTTTTG	1558	7	+	Oryza sativa	gibberellin-responsive element
TaPIN27	P-box	CCTTTTG	1582	7	+	Oryza sativa	gibberellin-responsive element
TaPIN27	ARE	AAACCA	1982	6	+	Zea mays	cis-acting regulatory element essential for the anaerobic induction
TaPIN27	TGACG-motif	TGACG	1437	5	+	Hordeum vulgare	cis-acting regulatory element involved in the MeJA-responsiveness
TaPIN27	ABRE	AACCCGG	426	7	+	Arabidopsis thaliana	cis-acting element involved in the abscisic acid responsiveness
TaPIN28	G-Box	CACGTT	461	6	+	Pisum sativum	cis-acting regulatory element involved in light responsiveness
TaPIN28	CAT-box	GCCACT	516	6	+	Arabidopsis thaliana	cis-acting regulatory element related to meristem expression
TaPIN28	CAT-box	GCCACT	1625	6	+	Arabidopsis thaliana	cis-acting regulatory element related to meristem expression
TaPIN28	MBS	CAACTG	920	6	+	Arabidopsis thaliana	MYB binding site involved in drought-inducibility
TaPIN28	circadian	CAAAGATATC	318	9	+	Lycopersicon esculentum	cis-acting regulatory element involved in circadian control
TaPIN28	circadian	CAAAGATATC	1764	9	+	Lycopersicon esculentum	cis-acting regulatory element involved in circadian control
TaPIN28	CGTCA-motif	CGTCA	1468	5	+	Hordeum vulgare	cis-acting regulatory element involved in the MeJA-responsiveness
TaPIN28	CGTCA-motif	CGTCA	1843	5	+	Hordeum vulgare	cis-acting regulatory element involved in the MeJA-responsiveness
TaPIN28	TGA-element	AACGAC	985	6	+	Brassica oleracea	auxin-responsive element
TaPIN28	TGA-element	AACGAC	1066	6	+	Brassica oleracea	auxin-responsive element
TaPIN28	AE-box	AGAAACTT	1750	8	+	Arabidopsis thaliana	part of a module for light response
TaPIN28	LTR	CCGAAA	852	6	+	Hordeum vulgare	cis-acting element involved in low-temperature responsiveness
TaPIN28	LTR	CCGAAA	1025	6	+	Hordeum vulgare	cis-acting element involved in low-temperature responsiveness
TaPIN28	G-box	CACGTC	1491	6	+	Zea mays	cis-acting regulatory element involved in light responsiveness
TaPIN28	G-box	CACGTC	1638	6	+	Zea mays	cis-acting regulatory element involved in light responsiveness
TaPIN28	TGACG-motif	TGACG	1468	5	+	Hordeum vulgare	cis-acting regulatory element involved in the MeJA-responsiveness
TaPIN28	TGACG-motif	TGACG	1843	5	+	Hordeum vulgare	cis-acting regulatory element involved in the MeJA-responsiveness
TaPIN28	ABRE	AACCCGG	47	7	+	Arabidopsis thaliana	cis-acting element involved in the abscisic acid responsiveness
TaPIN28	ABRE	ACGTG	461	5	+	Arabidopsis thaliana	cis-acting element involved in the abscisic acid responsiveness
TaPIN28	ABRE	CGCACGTGTC	1489	9	+	Hordeum vulgare	cis-acting element involved in the abscisic acid responsiveness
TaPIN28	ABRE	ACGTG	1491	5	+	Arabidopsis thaliana	cis-acting element involved in the abscisic acid responsiveness
TaPIN28	ABRE	ACGTG	1639	5	+	Arabidopsis thaliana	cis-acting element involved in the abscisic acid responsiveness
TaPIN28	Sp1	GGGCGG	942	6	+	Oryza sativa	light responsive element
TaPIN28	Sp1	GGGCGG	1355	6	+	Oryza sativa	light responsive element
TaPIN28	ARE	AAACCA	1962	6	+	Zea mays	cis-acting regulatory element essential for the anaerobic induction
TaPIN28	Box 4	ATTAAT	189	6	+	Petroselinum crispum	part of a conserved DNA module involved in light responsiveness
TaPIN29	GT1-motif	GGTTAA	1907	6	+	Arabidopsis thaliana	light responsive element
TaPIN29	G-box	CACGAC	37	6	+	Zea mays	cis-acting regulatory element involved in light responsiveness
TaPIN29	G-box	CACGTC	1591	6	+	Zea mays	cis-acting regulatory element involved in light responsiveness
TaPIN29	G-box	GCCACGTGGA	1620	9	+	Arabidopsis thaliana	cis-acting regulatory element involved in light responsiveness
TaPIN29	G-box	CACGTG	1622	6	+	Arabidopsis thaliana	cis-acting regulatory element involved in light responsiveness
TaPIN29	CAT-box	GCCACT	329	6	+	Arabidopsis thaliana	cis-acting regulatory element related to meristem expression
TaPIN29	RY-element	CATGCATG	1661	8	+	Helianthus annuus	cis-acting regulatory element involved in seed-specific regulation
TaPIN29	Box II	CCACGTGGC	1620	9	+	Petroselinum crispum	part of a light responsive element
TaPIN29	CGTCA-motif	CGTCA	61	5	+	Hordeum vulgare	cis-acting regulatory element involved in the MeJA-responsiveness
TaPIN29	CGTCA-motif	CGTCA	103	5	+	Hordeum vulgare	cis-acting regulatory element involved in the MeJA-responsiveness
TaPIN29	CGTCA-motif	CGTCA	206	5	+	Hordeum vulgare	cis-acting regulatory element involved in the MeJA-responsiveness
TaPIN29	CGTCA-motif	CGTCA	1590	5	+	Hordeum vulgare	cis-acting regulatory element involved in the MeJA-responsiveness
TaPIN29	CGTCA-motif	CGTCA	1607	5	+	Hordeum vulgare	cis-acting regulatory element involved in the MeJA-responsiveness
TaPIN29	CGTCA-motif	CGTCA	1713	5	+	Hordeum vulgare	cis-acting regulatory element involved in the MeJA-responsiveness
TaPIN29	ABRE	ACGTG	1592	5	+	Arabidopsis thaliana	cis-acting element involved in the abscisic acid responsiveness
TaPIN29	ABRE	CACGTG	1622	6	+	Arabidopsis thaliana	cis-acting element involved in the abscisic acid responsiveness
TaPIN29	ABRE	ACGTG	1623	5	+	Arabidopsis thaliana	cis-acting element involved in the abscisic acid responsiveness
TaPIN29	Sp1	GGGCGG	182	6	+	Oryza sativa	light responsive element
TaPIN29	Sp1	GGGCGG	481	6	+	Oryza sativa	light responsive element
TaPIN29	P-box	CCTTTTG	1385	7	+	Oryza sativa	gibberellin-responsive element
TaPIN29	LTR	CCGAAA	1397	6	+	Hordeum vulgare	cis-acting element involved in low-temperature responsiveness
TaPIN29	AE-box	AGAAACAA	986	8	+	Arabidopsis thaliana	part of a module for light response
TaPIN29	ATC-motif	TGCTATCCG	1248	9	+	Zea mays	part of a conserved DNA module involved in light responsiveness
TaPIN29	TGACG-motif	TGACG	61	5	+	Hordeum vulgare	cis-acting regulatory element involved in the MeJA-responsiveness
TaPIN29	TGACG-motif	TGACG	103	5	+	Hordeum vulgare	cis-acting regulatory element involved in the MeJA-responsiveness
TaPIN29	TGACG-motif	TGACG	206	5	+	Hordeum vulgare	cis-acting regulatory element involved in the MeJA-responsiveness
TaPIN29	TGACG-motif	TGACG	1590	5	+	Hordeum vulgare	cis-acting regulatory element involved in the MeJA-responsiveness
TaPIN29	TGACG-motif	TGACG	1607	5	+	Hordeum vulgare	cis-acting regulatory element involved in the MeJA-responsiveness
TaPIN29	TGACG-motif	TGACG	1713	5	+	Hordeum vulgare	cis-acting regulatory element involved in the MeJA-responsiveness
TaPIN29	ARE	AAACCA	1394	6	+	Zea mays	cis-acting regulatory element essential for the anaerobic induction
TaPIN29	I-box	GTATAAGGCC	1504	9	+	Larix laricina	part of a light responsive element
TaPIN29	GC-motif	CCCCCG	412	6	+	Zea mays	enhancer-like element involved in anoxic specific inducibility
TaPIN29	TATC-box	TATCCCA	1600	7	+	Oryza sativa	cis-acting element involved in gibberellin-responsiveness
TaPIN29	TGA-element	AACGAC	1840	6	+	Brassica oleracea	auxin-responsive element
TaPIN29	G-Box	CACGTG	1622	6	+	Pisum sativum	cis-acting regulatory element involved in light responsiveness
TaPIN29	CCAAT-box	CAACGG	415	6	+	Hordeum vulgare	MYBHv1 binding site
TaPIN30	MRE	AACCTAA	1069	7	-	Petroselinum crispum	MYB binding site involved in light responsiveness
TaPIN30	P-box	CCTTTTG	1281	7	-	Oryza sativa	gibberellin-responsive element
TaPIN30	LTR	CCGAAA	730	6	-	Hordeum vulgare	cis-acting element involved in low-temperature responsiveness
TaPIN30	TCT-motif	TCTTAC	1458	6	-	Arabidopsis thaliana	part of a light responsive element
TaPIN30	Box 4	ATTAAT	1216	6	-	Petroselinum crispum	part of a conserved DNA module involved in light responsiveness
TaPIN30	Box 4	ATTAAT	1271	6	-	Petroselinum crispum	part of a conserved DNA module involved in light responsiveness
TaPIN30	Box 4	ATTAAT	1331	6	-	Petroselinum crispum	part of a conserved DNA module involved in light responsiveness
TaPIN30	Box 4	ATTAAT	1335	6	-	Petroselinum crispum	part of a conserved DNA module involved in light responsiveness
TaPIN30	ARE	AAACCA	331	6	-	Zea mays	cis-acting regulatory element essential for the anaerobic induction
TaPIN30	ARE	AAACCA	866	6	-	Zea mays	cis-acting regulatory element essential for the anaerobic induction
TaPIN30	ARE	AAACCA	1254	6	-	Zea mays	cis-acting regulatory element essential for the anaerobic induction
TaPIN30	TGACG-motif	TGACG	446	5	-	Hordeum vulgare	cis-acting regulatory element involved in the MeJA-responsiveness
TaPIN30	TGACG-motif	TGACG	1025	5	-	Hordeum vulgare	cis-acting regulatory element involved in the MeJA-responsiveness
TaPIN30	G-box	CACGTC	444	6	-	Zea mays	cis-acting regulatory element involved in light responsiveness
TaPIN30	G-box	CACGAC	506	6	-	Zea mays	cis-acting regulatory element involved in light responsiveness
TaPIN30	G-box	CACGAC	873	6	-	Zea mays	cis-acting regulatory element involved in light responsiveness
TaPIN30	G-box	CAGACGTGGCA	1560	10	-	Nicotiana plumbaginifolia	cis-acting regulatory element involved in light responsiveness
TaPIN30	RY-element	CATGCATG	1231	8	-	Helianthus annuus	cis-acting regulatory element involved in seed-specific regulation
TaPIN30	TCA-element	CCATCTTTTT	1179	9	-	Nicotiana tabacum	cis-acting element involved in salicylic acid responsiveness
TaPIN30	GT1-motif	GGTTAAT	1275	7	-	Avena sativa	light responsive element
TaPIN30	GT1-motif	GGTTAA	1276	6	-	Arabidopsis thaliana	light responsive element
TaPIN30	ABRE	ACGTG	444	5	-	Arabidopsis thaliana	cis-acting element involved in the abscisic acid responsiveness
TaPIN30	CGTCA-motif	CGTCA	446	5	-	Hordeum vulgare	cis-acting regulatory element involved in the MeJA-responsiveness
TaPIN30	CGTCA-motif	CGTCA	1025	5	-	Hordeum vulgare	cis-acting regulatory element involved in the MeJA-responsiveness
TaPIN31	G-Box	CACGTT	359	6	-	Pisum sativum	cis-acting regulatory element involved in light responsiveness
TaPIN31	G-Box	CACGTG	1034	6	-	Pisum sativum	cis-acting regulatory element involved in light responsiveness
TaPIN31	GARE-motif	TCTGTTG	22	7	-	Brassica oleracea	gibberellin-responsive element
TaPIN31	I-box	cGATAAGGCG	1194	9	-	Zea mays	part of a light responsive element
TaPIN31	MBS	CAACTG	1464	6	-	Arabidopsis thaliana	MYB binding site involved in drought-inducibility
TaPIN31	GC-motif	CCCCCG	1862	6	-	Zea mays	enhancer-like element involved in anoxic specific inducibility
TaPIN31	CGTCA-motif	CGTCA	561	5	-	Hordeum vulgare	cis-acting regulatory element involved in the MeJA-responsiveness
TaPIN31	CGTCA-motif	CGTCA	830	5	-	Hordeum vulgare	cis-acting regulatory element involved in the MeJA-responsiveness
TaPIN31	CGTCA-motif	CGTCA	1398	5	-	Hordeum vulgare	cis-acting regulatory element involved in the MeJA-responsiveness
TaPIN31	ABRE	ACGTG	360	5	-	Arabidopsis thaliana	cis-acting element involved in the abscisic acid responsiveness
TaPIN31	ABRE	ACGTG	423	5	-	Arabidopsis thaliana	cis-acting element involved in the abscisic acid responsiveness
TaPIN31	ABRE	ACGTG	559	5	-	Arabidopsis thaliana	cis-acting element involved in the abscisic acid responsiveness
TaPIN31	ABRE	ACGTG	828	5	-	Arabidopsis thaliana	cis-acting element involved in the abscisic acid responsiveness
TaPIN31	ABRE	GACACGTGGC	1032	9	-	Triticum aestivum	cis-acting element involved in the abscisic acid responsiveness
TaPIN31	ABRE	CACGTG	1034	6	-	Arabidopsis thaliana	cis-acting element involved in the abscisic acid responsiveness
TaPIN31	ABRE	ACGTG	1035	5	-	Arabidopsis thaliana	cis-acting element involved in the abscisic acid responsiveness
TaPIN31	ABRE	ACGTG	1444	5	-	Arabidopsis thaliana	cis-acting element involved in the abscisic acid responsiveness
TaPIN31	MSA-like	TCAAACGGT	1392	9	-	Catharanthus roseus	cis-acting element involved in cell cycle regulation
TaPIN31	G-box	TAAACGTG	357	8	-	Brassica oleracea	cis-acting regulatory element involved in light responsiveness
TaPIN31	G-box	TACGTG	423	6	-	Arabidopsis thaliana	cis-acting regulatory element involved in light responsiveness
TaPIN31	G-box	CACGTC	559	6	-	Zea mays	cis-acting regulatory element involved in light responsiveness
TaPIN31	G-box	CACGTC	828	6	-	Zea mays	cis-acting regulatory element involved in light responsiveness
TaPIN31	G-box	tgACACGTGGCA	1031	11	-	Lycopersicon esculentum	cis-acting regulatory element involved in light responsiveness
TaPIN31	G-box	ACACGTGT	1033	8	-	Brassica napus	cis-acting regulatory element involved in light responsiveness
TaPIN31	G-box	CACGTG	1034	6	-	Arabidopsis thaliana	cis-acting regulatory element involved in light responsiveness
TaPIN31	G-box	TACGTG	1443	6	-	Arabidopsis thaliana	cis-acting regulatory element involved in light responsiveness
TaPIN31	TGACG-motif	TGACG	561	5	-	Hordeum vulgare	cis-acting regulatory element involved in the MeJA-responsiveness
TaPIN31	TGACG-motif	TGACG	830	5	-	Hordeum vulgare	cis-acting regulatory element involved in the MeJA-responsiveness
TaPIN31	TGACG-motif	TGACG	1398	5	-	Hordeum vulgare	cis-acting regulatory element involved in the MeJA-responsiveness
TaPIN31	GATA-motif	GATAGGG	110	7	-	Pisum sativum	part of a light responsive element
TaPIN31	GATA-motif	GATAGGG	681	7	-	Pisum sativum	part of a light responsive element
TaPIN32	ARE	AAACCA	1195	6	+	Zea mays	cis-acting regulatory element essential for the anaerobic induction
TaPIN32	GATA-motif	GATAGGG	711	7	+	Pisum sativum	part of a light responsive element
TaPIN32	TGACG-motif	TGACG	873	5	+	Hordeum vulgare	cis-acting regulatory element involved in the MeJA-responsiveness
TaPIN32	TGACG-motif	TGACG	1201	5	+	Hordeum vulgare	cis-acting regulatory element involved in the MeJA-responsiveness
TaPIN32	TGACG-motif	TGACG	1425	5	+	Hordeum vulgare	cis-acting regulatory element involved in the MeJA-responsiveness
TaPIN32	TGACG-motif	TGACG	1446	5	+	Hordeum vulgare	cis-acting regulatory element involved in the MeJA-responsiveness
TaPIN32	ATCT-motif	AATCTAATCC	633	10	+	Pisum sativum	part of a conserved DNA module involved in light responsiveness
TaPIN32	ATCT-motif	AATCTAATCC	1534	9	+	Pisum sativum	part of a conserved DNA module involved in light responsiveness
TaPIN32	I-box	cGATAAGGCG	1222	9	+	Zea mays	part of a light responsive element
TaPIN32	CGTCA-motif	CGTCA	873	5	+	Hordeum vulgare	cis-acting regulatory element involved in the MeJA-responsiveness
TaPIN32	CGTCA-motif	CGTCA	1201	5	+	Hordeum vulgare	cis-acting regulatory element involved in the MeJA-responsiveness
TaPIN32	CGTCA-motif	CGTCA	1425	5	+	Hordeum vulgare	cis-acting regulatory element involved in the MeJA-responsiveness
TaPIN32	CGTCA-motif	CGTCA	1446	5	+	Hordeum vulgare	cis-acting regulatory element involved in the MeJA-responsiveness
TaPIN32	GC-motif	CCCCCG	941	6	+	Zea mays	enhancer-like element involved in anoxic specific inducibility
TaPIN32	CAT-box	GCCACT	552	6	+	Arabidopsis thaliana	cis-acting regulatory element related to meristem expression
TaPIN32	CAT-box	GCCACT	1673	6	+	Arabidopsis thaliana	cis-acting regulatory element related to meristem expression
TaPIN32	AuxRR-core	GGTCCAT	1272	7	+	Nicotiana tabacum	cis-acting regulatory element involved in auxin responsiveness
TaPIN32	G-box	CACGAC	137	6	+	Zea mays	cis-acting regulatory element involved in light responsiveness
TaPIN32	G-box	CACGTC	871	6	+	Zea mays	cis-acting regulatory element involved in light responsiveness
TaPIN32	G-box	CACGTG	1098	6	+	Arabidopsis thaliana	cis-acting regulatory element involved in light responsiveness
TaPIN32	G-box	CACGTC	1199	6	+	Zea mays	cis-acting regulatory element involved in light responsiveness
TaPIN32	MBS	CAACTG	1491	6	+	Arabidopsis thaliana	MYB binding site involved in drought-inducibility
TaPIN32	G-Box	CACGTG	1098	6	+	Pisum sativum	cis-acting regulatory element involved in light responsiveness
TaPIN32	ABRE	ACGTG	871	5	+	Arabidopsis thaliana	cis-acting element involved in the abscisic acid responsiveness
TaPIN32	ABRE	CACGTG	1098	6	+	Arabidopsis thaliana	cis-acting element involved in the abscisic acid responsiveness
TaPIN32	ABRE	ACGTG	1099	5	+	Arabidopsis thaliana	cis-acting element involved in the abscisic acid responsiveness
TaPIN32	ABRE	ACGTG	1199	5	+	Arabidopsis thaliana	cis-acting element involved in the abscisic acid responsiveness
TaPIN33	CCAAT-box	CAACGG	1143	6	-	Hordeum vulgare	MYBHv1 binding site
TaPIN33	GCN4_motif	TGAGTCA	106	7	-	Oryza sativa	cis-regulatory element involved in endosperm expression
TaPIN33	TCCC-motif	TCTCCCT	718	7	-	Spinacia oleracea	part of a light responsive element
TaPIN33	G-Box	CACGTT	1056	6	-	Pisum sativum	cis-acting regulatory element involved in light responsiveness
TaPIN33	MBS	CAACTG	111	6	-	Arabidopsis thaliana	MYB binding site involved in drought-inducibility
TaPIN33	TGACG-motif	TGACG	465	5	-	Hordeum vulgare	cis-acting regulatory element involved in the MeJA-responsiveness
TaPIN33	TGACG-motif	TGACG	978	5	-	Hordeum vulgare	cis-acting regulatory element involved in the MeJA-responsiveness
TaPIN33	TGACG-motif	TGACG	997	5	-	Hordeum vulgare	cis-acting regulatory element involved in the MeJA-responsiveness
TaPIN33	TGACG-motif	TGACG	1043	5	-	Hordeum vulgare	cis-acting regulatory element involved in the MeJA-responsiveness
TaPIN33	TGACG-motif	TGACG	1492	5	-	Hordeum vulgare	cis-acting regulatory element involved in the MeJA-responsiveness
TaPIN33	CGTCA-motif	CGTCA	465	5	-	Hordeum vulgare	cis-acting regulatory element involved in the MeJA-responsiveness
TaPIN33	CGTCA-motif	CGTCA	978	5	-	Hordeum vulgare	cis-acting regulatory element involved in the MeJA-responsiveness
TaPIN33	CGTCA-motif	CGTCA	997	5	-	Hordeum vulgare	cis-acting regulatory element involved in the MeJA-responsiveness
TaPIN33	CGTCA-motif	CGTCA	1043	5	-	Hordeum vulgare	cis-acting regulatory element involved in the MeJA-responsiveness
TaPIN33	CGTCA-motif	CGTCA	1492	5	-	Hordeum vulgare	cis-acting regulatory element involved in the MeJA-responsiveness
TaPIN33	ABRE	ACGTG	1057	5	-	Arabidopsis thaliana	cis-acting element involved in the abscisic acid responsiveness
TaPIN33	ABRE	ACGTG	1490	5	-	Arabidopsis thaliana	cis-acting element involved in the abscisic acid responsiveness
TaPIN33	ABRE	GCCGCGTGGC	1842	9	-	Oryza sativa	cis-acting element involved in the abscisic acid responsiveness
TaPIN33	G-box	CACGAC	990	6	-	Zea mays	cis-acting regulatory element involved in light responsiveness
TaPIN33	G-box	CACGTC	1490	6	-	Zea mays	cis-acting regulatory element involved in light responsiveness
TaPIN33	GC-motif	CCCCCG	1762	6	-	Zea mays	enhancer-like element involved in anoxic specific inducibility
TaPIN33	GC-motif	CCCCCG	1801	6	-	Zea mays	enhancer-like element involved in anoxic specific inducibility
TaPIN33	GC-motif	CCCCCG	1815	6	-	Zea mays	enhancer-like element involved in anoxic specific inducibility
TaPIN33	TGA-element	AACGAC	1416	6	-	Brassica oleracea	auxin-responsive element
TaPIN33	chs-CMA2a	TCACTTGA	1892	8	-	Petroselinum crispum	part of a light responsive element
TaPIN33	LTR	CCGAAA	386	6	-	Hordeum vulgare	cis-acting element involved in low-temperature responsiveness
TaPIN33	LTR	CCGAAA	558	6	-	Hordeum vulgare	cis-acting element involved in low-temperature responsiveness
TaPIN33	LTR	CCGAAA	1086	6	-	Hordeum vulgare	cis-acting element involved in low-temperature responsiveness
TaPIN34	MRE	AACCTAA	843	7	+	Petroselinum crispum	MYB binding site involved in light responsiveness
TaPIN34	CAAT-box	CAAAT	138	5	+	Pisum sativum	common cis-acting element in promoter and enhancer regions
TaPIN34	ABRE	ACGTG	256	5	+	Arabidopsis thaliana	cis-acting element involved in the abscisic acid responsiveness
TaPIN34	O2-site	GATGATGTGG	112	9	+	Zea mays	cis-acting regulatory element involved in zein metabolism regulation
TaPIN34	O2-site	GATGATGTGG	344	9	+	Zea mays	cis-acting regulatory element involved in zein metabolism regulation
TaPIN34	O2-site	GATGATGTGG	1149	9	+	Zea mays	cis-acting regulatory element involved in zein metabolism regulation
TaPIN34	CAT-box	GCCACT	942	6	+	Arabidopsis thaliana	cis-acting regulatory element related to meristem expression
TaPIN34	CAT-box	GCCACT	1635	6	+	Arabidopsis thaliana	cis-acting regulatory element related to meristem expression
TaPIN34	GCN4_motif	TGAGTCA	290	7	+	Oryza sativa	cis-regulatory element involved in endosperm expression
TaPIN34	TCT-motif	TCTTAC	811	6	+	Arabidopsis thaliana	part of a light responsive element
TaPIN34	TCT-motif	TCTTAC	829	6	+	Arabidopsis thaliana	part of a light responsive element
TaPIN34	CGTCA-motif	CGTCA	70	5	+	Hordeum vulgare	cis-acting regulatory element involved in the MeJA-responsiveness
TaPIN34	CGTCA-motif	CGTCA	404	5	+	Hordeum vulgare	cis-acting regulatory element involved in the MeJA-responsiveness
TaPIN34	CGTCA-motif	CGTCA	1360	5	+	Hordeum vulgare	cis-acting regulatory element involved in the MeJA-responsiveness
TaPIN34	G-box	CACGAC	45	6	+	Zea mays	cis-acting regulatory element involved in light responsiveness
TaPIN34	G-box	TACGTG	256	6	+	Arabidopsis thaliana	cis-acting regulatory element involved in light responsiveness
TaPIN34	G-box	CACGAC	394	6	+	Zea mays	cis-acting regulatory element involved in light responsiveness
TaPIN34	G-box	CACGAC	785	6	+	Zea mays	cis-acting regulatory element involved in light responsiveness
TaPIN34	GC-motif	CCCCCG	51	6	+	Zea mays	enhancer-like element involved in anoxic specific inducibility
TaPIN34	TGACG-motif	TGACG	70	5	+	Hordeum vulgare	cis-acting regulatory element involved in the MeJA-responsiveness
TaPIN34	TGACG-motif	TGACG	404	5	+	Hordeum vulgare	cis-acting regulatory element involved in the MeJA-responsiveness
TaPIN34	TGACG-motif	TGACG	1360	5	+	Hordeum vulgare	cis-acting regulatory element involved in the MeJA-responsiveness
TaPIN34	ARE	AAACCA	1061	6	+	Zea mays	cis-acting regulatory element essential for the anaerobic induction
TaPIN34	ARE	AAACCA	1164	6	+	Zea mays	cis-acting regulatory element essential for the anaerobic induction
TaPIN34	ARE	AAACCA	1622	6	+	Zea mays	cis-acting regulatory element essential for the anaerobic induction
TaPIN34	GT1-motif	GGTTAA	362	6	+	Arabidopsis thaliana	light responsive element
TaPIN34	GT1-motif	GGTTAA	918	6	+	Arabidopsis thaliana	light responsive element
TaPIN34	GT1-motif	GGTTAAT	1005	7	+	Avena sativa	light responsive element
TaPIN34	GT1-motif	GGTTAA	1006	6	+	Arabidopsis thaliana	light responsive element
TaPIN34	GT1-motif	GGTTAA	1190	6	+	Arabidopsis thaliana	light responsive element
TaPIN34	GTGGC-motif	GATTCTGTGGC	1830	10	+	Spinacia oleracea	part of a light responsive element
TaPIN34	I-box	TGATAATGT	174	9	+	Solanum tuberosum	part of a light responsive element
TaPIN35	G-box	CACGAC	561	6	+	Zea mays	cis-acting regulatory element involved in light responsiveness
TaPIN35	LTR	CCGAAA	838	6	+	Hordeum vulgare	cis-acting element involved in low-temperature responsiveness
TaPIN35	LTR	CCGAAA	857	6	+	Hordeum vulgare	cis-acting element involved in low-temperature responsiveness
TaPIN35	MBS	CAACTG	1705	6	+	Arabidopsis thaliana	MYB binding site involved in drought-inducibility
TaPIN35	HD-Zip 1	CAAT(A/T)ATTG	30	8	+	Arabidopsis thaliana	element involved in differentiation of the palisade mesophyll cells
TaPIN35	I-box	gGATAAGGTG	782	9	+	Zea mays	part of a light responsive element
TaPIN35	TGA-element	AACGAC	1853	6	+	Brassica oleracea	auxin-responsive element
TaPIN35	O2-site	GTTGACGTGA	282	9	+	Zea mays	cis-acting regulatory element involved in zein metabolism regulation
TaPIN35	TCT-motif	TCTTAC	12	6	+	Arabidopsis thaliana	part of a light responsive element
TaPIN35	CAT-box	GCCACT	1341	6	+	Arabidopsis thaliana	cis-acting regulatory element related to meristem expression
TaPIN35	GC-motif	CCCCCG	1058	6	+	Zea mays	enhancer-like element involved in anoxic specific inducibility
TaPIN35	ATCT-motif	AATCTAATCC	1794	9	+	Pisum sativum	part of a conserved DNA module involved in light responsiveness
TaPIN35	Sp1	GGGCGG	1521	6	+	Oryza sativa	light responsive element
TaPIN35	ARE	AAACCA	748	6	+	Zea mays	cis-acting regulatory element essential for the anaerobic induction
TaPIN35	ARE	AAACCA	754	6	+	Zea mays	cis-acting regulatory element essential for the anaerobic induction
TaPIN35	ARE	AAACCA	1572	6	+	Zea mays	cis-acting regulatory element essential for the anaerobic induction
TaPIN35	ARE	AAACCA	1701	6	+	Zea mays	cis-acting regulatory element essential for the anaerobic induction
TaPIN35	TC-rich repeats	GTTTTCTTAC	12	9	+	Nicotiana tabacum	cis-acting element involved in defense and stress responsiveness
TaPIN36	MRE	AACCTAA	581	7	-	Petroselinum crispum	MYB binding site involved in light responsiveness
TaPIN36	G-box	CACGTC	1109	6	-	Zea mays	cis-acting regulatory element involved in light responsiveness
TaPIN36	chs-CMA2a	TCACTTGA	1878	8	-	Petroselinum crispum	part of a light responsive element
TaPIN36	TGACG-motif	TGACG	928	5	-	Hordeum vulgare	cis-acting regulatory element involved in the MeJA-responsiveness
TaPIN36	TGACG-motif	TGACG	1111	5	-	Hordeum vulgare	cis-acting regulatory element involved in the MeJA-responsiveness
TaPIN36	TGACG-motif	TGACG	1131	5	-	Hordeum vulgare	cis-acting regulatory element involved in the MeJA-responsiveness
TaPIN36	TGACG-motif	TGACG	1248	5	-	Hordeum vulgare	cis-acting regulatory element involved in the MeJA-responsiveness
TaPIN36	TGACG-motif	TGACG	1264	5	-	Hordeum vulgare	cis-acting regulatory element involved in the MeJA-responsiveness
TaPIN36	Box 4	ATTAAT	228	6	-	Petroselinum crispum	part of a conserved DNA module involved in light responsiveness
TaPIN36	I-box	gGATAAGGTG	1312	9	-	Zea mays	part of a light responsive element
TaPIN36	Box II	TGGTAATAA	200	9	-	Solanum tuberosum	part of a light responsive element
TaPIN36	TATC-box	TATCCCA	1317	7	-	Oryza sativa	cis-acting element involved in gibberellin-responsiveness
TaPIN36	GATA-motif	AAGGATAAGG	1308	9	-	Solanum tuberosum	part of a light responsive element
TaPIN36	CGTCA-motif	CGTCA	928	5	-	Hordeum vulgare	cis-acting regulatory element involved in the MeJA-responsiveness
TaPIN36	CGTCA-motif	CGTCA	1111	5	-	Hordeum vulgare	cis-acting regulatory element involved in the MeJA-responsiveness
TaPIN36	CGTCA-motif	CGTCA	1131	5	-	Hordeum vulgare	cis-acting regulatory element involved in the MeJA-responsiveness
TaPIN36	CGTCA-motif	CGTCA	1248	5	-	Hordeum vulgare	cis-acting regulatory element involved in the MeJA-responsiveness
TaPIN36	CGTCA-motif	CGTCA	1264	5	-	Hordeum vulgare	cis-acting regulatory element involved in the MeJA-responsiveness
TaPIN36	ATC-motif	AGTAATCT	544	8	-	Spinacia oleracea	part of a conserved DNA module involved in light responsiveness
TaPIN36	TGA-element	AACGAC	1399	6	-	Brassica oleracea	auxin-responsive element
TaPIN36	ABRE	ACGTG	1109	5	-	Arabidopsis thaliana	cis-acting element involved in the abscisic acid responsiveness
TaPIN36	ABRE	GCCGCGTGGC	1832	9	-	Oryza sativa	cis-acting element involved in the abscisic acid responsiveness
TaPIN36	GTGGC-motif	CAGCGTGTGGC	1692	10	-	Hordeum vulgare	part of a light responsive element
TaPIN36	TCT-motif	TCTTAC	813	6	-	Arabidopsis thaliana	part of a light responsive element
TaPIN36	ARE	AAACCA	974	6	-	Zea mays	cis-acting regulatory element essential for the anaerobic induction
TaPIN36	GC-motif	CCCCCG	1752	6	-	Zea mays	enhancer-like element involved in anoxic specific inducibility
TaPIN36	GC-motif	CCCCCG	1791	6	-	Zea mays	enhancer-like element involved in anoxic specific inducibility
TaPIN36	GC-motif	CCCCCG	1805	6	-	Zea mays	enhancer-like element involved in anoxic specific inducibility
TaPIN36	circadian	CAAAGATATC	499	9	-	Lycopersicon esculentum	cis-acting regulatory element involved in circadian control
TaPIN36	circadian	CAAAGATATC	503	9	-	Lycopersicon esculentum	cis-acting regulatory element involved in circadian control
TaPIN37	TGACG-motif	TGACG	442	5	-	Hordeum vulgare	cis-acting regulatory element involved in the MeJA-responsiveness
TaPIN37	TGACG-motif	TGACG	537	5	-	Hordeum vulgare	cis-acting regulatory element involved in the MeJA-responsiveness
TaPIN37	TGACG-motif	TGACG	709	5	-	Hordeum vulgare	cis-acting regulatory element involved in the MeJA-responsiveness
TaPIN37	TGACG-motif	TGACG	1112	5	-	Hordeum vulgare	cis-acting regulatory element involved in the MeJA-responsiveness
TaPIN37	TGACG-motif	TGACG	1437	5	-	Hordeum vulgare	cis-acting regulatory element involved in the MeJA-responsiveness
TaPIN37	TGACG-motif	TGACG	1815	5	-	Hordeum vulgare	cis-acting regulatory element involved in the MeJA-responsiveness
TaPIN37	Sp1	GGGCGG	504	6	-	Oryza sativa	light responsive element
TaPIN37	Sp1	GGGCGG	872	6	-	Oryza sativa	light responsive element
TaPIN37	Sp1	GGGCGG	938	6	-	Oryza sativa	light responsive element
TaPIN37	I-box	cGATAAGGCG	1155	9	-	Zea mays	part of a light responsive element
TaPIN37	GT1-motif	GGTTAA	1803	6	-	Arabidopsis thaliana	light responsive element
TaPIN37	G-box	CACGTC	148	6	-	Zea mays	cis-acting regulatory element involved in light responsiveness
TaPIN37	G-box	CACGTC	535	6	-	Zea mays	cis-acting regulatory element involved in light responsiveness
TaPIN37	G-box	CACGTG	877	6	-	Arabidopsis thaliana	cis-acting regulatory element involved in light responsiveness
TaPIN37	G-box	TACGTG	1587	6	-	Arabidopsis thaliana	cis-acting regulatory element involved in light responsiveness
TaPIN37	G-box	CACGTC	1674	6	-	Zea mays	cis-acting regulatory element involved in light responsiveness
TaPIN37	G-box	CACGTC	1833	6	-	Zea mays	cis-acting regulatory element involved in light responsiveness
TaPIN37	MBS	CAACTG	899	6	-	Arabidopsis thaliana	MYB binding site involved in drought-inducibility
TaPIN37	MBS	CAACTG	1377	6	-	Arabidopsis thaliana	MYB binding site involved in drought-inducibility
TaPIN37	CCAAT-box	CAACGG	300	6	-	Hordeum vulgare	MYBHv1 binding site
TaPIN37	ACE	GCGACGTACC	1831	9	-	Petroselinum crispum	cis-acting element involved in light responsiveness
TaPIN37	G-Box	CACGTG	877	6	-	Pisum sativum	cis-acting regulatory element involved in light responsiveness
TaPIN37	G-Box	CACGTT	1604	6	-	Pisum sativum	cis-acting regulatory element involved in light responsiveness
TaPIN37	ABRE	CGCACGTGTC	146	9	-	Hordeum vulgare	cis-acting element involved in the abscisic acid responsiveness
TaPIN37	ABRE	ACGTG	149	5	-	Arabidopsis thaliana	cis-acting element involved in the abscisic acid responsiveness
TaPIN37	ABRE	ACGTG	535	5	-	Arabidopsis thaliana	cis-acting element involved in the abscisic acid responsiveness
TaPIN37	ABRE	CGCACGTGTC	875	9	-	Hordeum vulgare	cis-acting element involved in the abscisic acid responsiveness
TaPIN37	ABRE	CACGTG	877	6	-	Arabidopsis thaliana	cis-acting element involved in the abscisic acid responsiveness
TaPIN37	ABRE	ACGTG	878	5	-	Arabidopsis thaliana	cis-acting element involved in the abscisic acid responsiveness
TaPIN37	ABRE	ACGTG	1587	5	-	Arabidopsis thaliana	cis-acting element involved in the abscisic acid responsiveness
TaPIN37	ABRE	ACGTG	1604	5	-	Arabidopsis thaliana	cis-acting element involved in the abscisic acid responsiveness
TaPIN37	ABRE	ACGTG	1675	5	-	Arabidopsis thaliana	cis-acting element involved in the abscisic acid responsiveness
TaPIN37	ABRE	ACGTG	1834	5	-	Arabidopsis thaliana	cis-acting element involved in the abscisic acid responsiveness
TaPIN37	RY-element	CATGCATG	11	8	-	Helianthus annuus	cis-acting regulatory element involved in seed-specific regulation
TaPIN37	TC-rich repeats	ATTCTCTAAC	344	9	-	Nicotiana tabacum	cis-acting element involved in defense and stress responsiveness
TaPIN37	CAT-box	GCCACT	1241	6	-	Arabidopsis thaliana	cis-acting regulatory element related to meristem expression
TaPIN37	CAT-box	GCCACT	1418	6	-	Arabidopsis thaliana	cis-acting regulatory element related to meristem expression
TaPIN37	CAT-box	GCCACT	1429	6	-	Arabidopsis thaliana	cis-acting regulatory element related to meristem expression
TaPIN37	CAT-box	GCCACT	1772	6	-	Arabidopsis thaliana	cis-acting regulatory element related to meristem expression
TaPIN37	CAT-box	GCCACT	1869	6	-	Arabidopsis thaliana	cis-acting regulatory element related to meristem expression
TaPIN37	CGTCA-motif	CGTCA	442	5	-	Hordeum vulgare	cis-acting regulatory element involved in the MeJA-responsiveness
TaPIN37	CGTCA-motif	CGTCA	537	5	-	Hordeum vulgare	cis-acting regulatory element involved in the MeJA-responsiveness
TaPIN37	CGTCA-motif	CGTCA	709	5	-	Hordeum vulgare	cis-acting regulatory element involved in the MeJA-responsiveness
TaPIN37	CGTCA-motif	CGTCA	1112	5	-	Hordeum vulgare	cis-acting regulatory element involved in the MeJA-responsiveness
TaPIN37	CGTCA-motif	CGTCA	1437	5	-	Hordeum vulgare	cis-acting regulatory element involved in the MeJA-responsiveness
TaPIN37	CGTCA-motif	CGTCA	1815	5	-	Hordeum vulgare	cis-acting regulatory element involved in the MeJA-responsiveness
TaPIN37	TGA-element	AACGAC	338	6	-	Brassica oleracea	auxin-responsive element
TaPIN37	TGA-element	AACGAC	1574	6	-	Brassica oleracea	auxin-responsive element
TaPIN38	MBS	CAACTG	1075	6	+	Arabidopsis thaliana	MYB binding site involved in drought-inducibility
TaPIN38	RY-element	CATGCATG	964	8	+	Helianthus annuus	cis-acting regulatory element involved in seed-specific regulation
TaPIN38	CAT-box	GCCACT	89	6	+	Arabidopsis thaliana	cis-acting regulatory element related to meristem expression
TaPIN38	CAT-box	GCCACT	1859	6	+	Arabidopsis thaliana	cis-acting regulatory element related to meristem expression
TaPIN38	CGTCA-motif	CGTCA	211	5	+	Hordeum vulgare	cis-acting regulatory element involved in the MeJA-responsiveness
TaPIN38	CGTCA-motif	CGTCA	1347	5	+	Hordeum vulgare	cis-acting regulatory element involved in the MeJA-responsiveness
TaPIN38	CGTCA-motif	CGTCA	1514	5	+	Hordeum vulgare	cis-acting regulatory element involved in the MeJA-responsiveness
TaPIN38	CGTCA-motif	CGTCA	1737	5	+	Hordeum vulgare	cis-acting regulatory element involved in the MeJA-responsiveness
TaPIN38	CGTCA-motif	CGTCA	1805	5	+	Hordeum vulgare	cis-acting regulatory element involved in the MeJA-responsiveness
TaPIN38	ACE	GCGACGTACC	1821	9	+	Petroselinum crispum	cis-acting element involved in light responsiveness
TaPIN38	chs-CMA2a	TCACTTGA	895	8	+	Petroselinum crispum	part of a light responsive element
TaPIN38	TGACG-motif	TGACG	211	5	+	Hordeum vulgare	cis-acting regulatory element involved in the MeJA-responsiveness
TaPIN38	TGACG-motif	TGACG	1347	5	+	Hordeum vulgare	cis-acting regulatory element involved in the MeJA-responsiveness
TaPIN38	TGACG-motif	TGACG	1514	5	+	Hordeum vulgare	cis-acting regulatory element involved in the MeJA-responsiveness
TaPIN38	TGACG-motif	TGACG	1737	5	+	Hordeum vulgare	cis-acting regulatory element involved in the MeJA-responsiveness
TaPIN38	TGACG-motif	TGACG	1805	5	+	Hordeum vulgare	cis-acting regulatory element involved in the MeJA-responsiveness
TaPIN38	CCAAT-box	CAACGG	170	6	+	Hordeum vulgare	MYBHv1 binding site
TaPIN38	CCAAT-box	CAACGG	1010	6	+	Hordeum vulgare	MYBHv1 binding site
TaPIN38	TGA-element	AACGAC	412	6	+	Brassica oleracea	auxin-responsive element
TaPIN38	TGA-element	AACGAC	1791	6	+	Brassica oleracea	auxin-responsive element
TaPIN38	ABRE	ACGTG	1372	5	+	Arabidopsis thaliana	cis-acting element involved in the abscisic acid responsiveness
TaPIN38	ABRE	CGCACGTGTC	1549	9	+	Hordeum vulgare	cis-acting element involved in the abscisic acid responsiveness
TaPIN38	ABRE	ACGTG	1552	5	+	Arabidopsis thaliana	cis-acting element involved in the abscisic acid responsiveness
TaPIN38	ABRE	ACGTG	1803	5	+	Arabidopsis thaliana	cis-acting element involved in the abscisic acid responsiveness
TaPIN38	ABRE	ACGTG	1824	5	+	Arabidopsis thaliana	cis-acting element involved in the abscisic acid responsiveness
TaPIN38	O2-site	GTTGACGTGA	1802	9	+	Zea mays	cis-acting regulatory element involved in zein metabolism regulation
TaPIN38	G-Box	CACGTT	1372	6	+	Pisum sativum	cis-acting regulatory element involved in light responsiveness
TaPIN38	ARE	AAACCA	709	6	+	Zea mays	cis-acting regulatory element essential for the anaerobic induction
TaPIN38	G-box	CACGAC	343	6	+	Zea mays	cis-acting regulatory element involved in light responsiveness
TaPIN38	G-box	CACGTC	1551	6	+	Zea mays	cis-acting regulatory element involved in light responsiveness
TaPIN38	G-box	CACGTC	1803	6	+	Zea mays	cis-acting regulatory element involved in light responsiveness
TaPIN38	G-box	CACGTC	1823	6	+	Zea mays	cis-acting regulatory element involved in light responsiveness
TaPIN38	LTR	CCGAAA	934	6	+	Hordeum vulgare	cis-acting element involved in low-temperature responsiveness
TaPIN38	LTR	CCGAAA	1315	6	+	Hordeum vulgare	cis-acting element involved in low-temperature responsiveness
TaPIN39	chs-CMA2a	TCACTTGA	895	8	+	Petroselinum crispum	part of a light responsive element
TaPIN39	ARE	AAACCA	709	6	+	Zea mays	cis-acting regulatory element essential for the anaerobic induction
TaPIN39	TGACG-motif	TGACG	211	5	+	Hordeum vulgare	cis-acting regulatory element involved in the MeJA-responsiveness
TaPIN39	TGACG-motif	TGACG	1347	5	+	Hordeum vulgare	cis-acting regulatory element involved in the MeJA-responsiveness
TaPIN39	TGACG-motif	TGACG	1514	5	+	Hordeum vulgare	cis-acting regulatory element involved in the MeJA-responsiveness
TaPIN39	TGACG-motif	TGACG	1737	5	+	Hordeum vulgare	cis-acting regulatory element involved in the MeJA-responsiveness
TaPIN39	TGACG-motif	TGACG	1805	5	+	Hordeum vulgare	cis-acting regulatory element involved in the MeJA-responsiveness
TaPIN39	TGA-element	AACGAC	412	6	+	Brassica oleracea	auxin-responsive element
TaPIN39	TGA-element	AACGAC	1791	6	+	Brassica oleracea	auxin-responsive element
TaPIN39	ABRE	ACGTG	1372	5	+	Arabidopsis thaliana	cis-acting element involved in the abscisic acid responsiveness
TaPIN39	ABRE	CGCACGTGTC	1549	9	+	Hordeum vulgare	cis-acting element involved in the abscisic acid responsiveness
TaPIN39	ABRE	ACGTG	1552	5	+	Arabidopsis thaliana	cis-acting element involved in the abscisic acid responsiveness
TaPIN39	ABRE	ACGTG	1803	5	+	Arabidopsis thaliana	cis-acting element involved in the abscisic acid responsiveness
TaPIN39	ABRE	ACGTG	1824	5	+	Arabidopsis thaliana	cis-acting element involved in the abscisic acid responsiveness
TaPIN39	G-Box	CACGTT	1372	6	+	Pisum sativum	cis-acting regulatory element involved in light responsiveness
TaPIN39	CAT-box	GCCACT	89	6	+	Arabidopsis thaliana	cis-acting regulatory element related to meristem expression
TaPIN39	CAT-box	GCCACT	1859	6	+	Arabidopsis thaliana	cis-acting regulatory element related to meristem expression
TaPIN39	O2-site	GTTGACGTGA	1802	9	+	Zea mays	cis-acting regulatory element involved in zein metabolism regulation
TaPIN39	CGTCA-motif	CGTCA	211	5	+	Hordeum vulgare	cis-acting regulatory element involved in the MeJA-responsiveness
TaPIN39	CGTCA-motif	CGTCA	1347	5	+	Hordeum vulgare	cis-acting regulatory element involved in the MeJA-responsiveness
TaPIN39	CGTCA-motif	CGTCA	1514	5	+	Hordeum vulgare	cis-acting regulatory element involved in the MeJA-responsiveness
TaPIN39	CGTCA-motif	CGTCA	1737	5	+	Hordeum vulgare	cis-acting regulatory element involved in the MeJA-responsiveness
TaPIN39	CGTCA-motif	CGTCA	1805	5	+	Hordeum vulgare	cis-acting regulatory element involved in the MeJA-responsiveness
TaPIN39	ACE	GCGACGTACC	1821	9	+	Petroselinum crispum	cis-acting element involved in light responsiveness
TaPIN39	RY-element	CATGCATG	964	8	+	Helianthus annuus	cis-acting regulatory element involved in seed-specific regulation
TaPIN39	G-box	CACGAC	343	6	+	Zea mays	cis-acting regulatory element involved in light responsiveness
TaPIN39	G-box	CACGTC	1551	6	+	Zea mays	cis-acting regulatory element involved in light responsiveness
TaPIN39	G-box	CACGTC	1803	6	+	Zea mays	cis-acting regulatory element involved in light responsiveness
TaPIN39	G-box	CACGTC	1823	6	+	Zea mays	cis-acting regulatory element involved in light responsiveness
TaPIN39	MBS	CAACTG	1075	6	+	Arabidopsis thaliana	MYB binding site involved in drought-inducibility
TaPIN39	LTR	CCGAAA	934	6	+	Hordeum vulgare	cis-acting element involved in low-temperature responsiveness
TaPIN39	LTR	CCGAAA	1315	6	+	Hordeum vulgare	cis-acting element involved in low-temperature responsiveness
TaPIN40	ARE	AAACCA	100	6	+	Zea mays	cis-acting regulatory element essential for the anaerobic induction
TaPIN40	ARE	AAACCA	482	6	+	Zea mays	cis-acting regulatory element essential for the anaerobic induction
TaPIN40	ARE	AAACCA	488	6	+	Zea mays	cis-acting regulatory element essential for the anaerobic induction
TaPIN40	ARE	AAACCA	1229	6	+	Zea mays	cis-acting regulatory element essential for the anaerobic induction
TaPIN40	ARE	AAACCA	1596	6	+	Zea mays	cis-acting regulatory element essential for the anaerobic induction
TaPIN40	ARE	AAACCA	1725	6	+	Zea mays	cis-acting regulatory element essential for the anaerobic induction
TaPIN40	ABRE	ACGTG	256	5	+	Arabidopsis thaliana	cis-acting element involved in the abscisic acid responsiveness
TaPIN40	ABRE	ACGTG	1754	5	+	Arabidopsis thaliana	cis-acting element involved in the abscisic acid responsiveness
TaPIN40	CGTCA-motif	CGTCA	743	5	+	Hordeum vulgare	cis-acting regulatory element involved in the MeJA-responsiveness
TaPIN40	CGTCA-motif	CGTCA	1423	5	+	Hordeum vulgare	cis-acting regulatory element involved in the MeJA-responsiveness
TaPIN40	ATCT-motif	AATCTAATCC	1812	9	+	Pisum sativum	part of a conserved DNA module involved in light responsiveness
TaPIN40	MRE	AACCTAA	1084	7	+	Petroselinum crispum	MYB binding site involved in light responsiveness
TaPIN40	chs-CMA1a	TTACTTAA	1842	8	+	Daucus carota	part of a light responsive element
TaPIN40	CCAAT-box	CAACGG	1970	6	+	Hordeum vulgare	MYBHv1 binding site
TaPIN40	Sp1	GGGCGG	1175	6	+	Oryza sativa	light responsive element
TaPIN40	Sp1	GGGCGG	1560	6	+	Oryza sativa	light responsive element
TaPIN40	TGACG-motif	TGACG	743	5	+	Hordeum vulgare	cis-acting regulatory element involved in the MeJA-responsiveness
TaPIN40	TGACG-motif	TGACG	1423	5	+	Hordeum vulgare	cis-acting regulatory element involved in the MeJA-responsiveness
TaPIN40	chs-CMA2a	TCACTTGA	391	8	+	Petroselinum crispum	part of a light responsive element
TaPIN40	G-box	CACGAC	196	6	+	Zea mays	cis-acting regulatory element involved in light responsiveness
TaPIN40	G-box	TACGTG	256	6	+	Arabidopsis thaliana	cis-acting regulatory element involved in light responsiveness
TaPIN40	G-box	TACGTG	1753	6	+	Arabidopsis thaliana	cis-acting regulatory element involved in light responsiveness
TaPIN40	CAT-box	GCCACT	1386	6	+	Arabidopsis thaliana	cis-acting regulatory element related to meristem expression
TaPIN40	I-box	gGATAAGGTG	516	9	+	Zea mays	part of a light responsive element
TaPIN40	I-box	GATAAGGGT	1020	9	+	Arabidopsis thaliana	part of a light responsive element
TaPIN41	ARE	AAACCA	168	6	-	Zea mays	cis-acting regulatory element essential for the anaerobic induction
TaPIN41	ARE	AAACCA	978	6	-	Zea mays	cis-acting regulatory element essential for the anaerobic induction
TaPIN41	P-box	CCTTTTG	1513	7	-	Oryza sativa	gibberellin-responsive element
TaPIN41	Sp1	GGGCGG	14	6	-	Oryza sativa	light responsive element
TaPIN41	TGA-element	AACGAC	1406	6	-	Brassica oleracea	auxin-responsive element
TaPIN41	circadian	CAAAGATATC	798	9	-	Lycopersicon esculentum	cis-acting regulatory element involved in circadian control
TaPIN41	Box II	TGGTAATAA	538	9	-	Solanum tuberosum	part of a light responsive element
TaPIN41	GT1-motif	GGTTAAT	328	7	-	Avena sativa	light responsive element
TaPIN41	GT1-motif	GGTTAA	329	6	-	Arabidopsis thaliana	light responsive element
TaPIN41	G-box	CACGTC	1113	6	-	Zea mays	cis-acting regulatory element involved in light responsiveness
TaPIN41	G-box	CACGTC	1426	6	-	Zea mays	cis-acting regulatory element involved in light responsiveness
TaPIN41	CGTCA-motif	CGTCA	932	5	-	Hordeum vulgare	cis-acting regulatory element involved in the MeJA-responsiveness
TaPIN41	CGTCA-motif	CGTCA	1115	5	-	Hordeum vulgare	cis-acting regulatory element involved in the MeJA-responsiveness
TaPIN41	CGTCA-motif	CGTCA	1251	5	-	Hordeum vulgare	cis-acting regulatory element involved in the MeJA-responsiveness
TaPIN41	CGTCA-motif	CGTCA	1267	5	-	Hordeum vulgare	cis-acting regulatory element involved in the MeJA-responsiveness
TaPIN41	CGTCA-motif	CGTCA	1425	5	-	Hordeum vulgare	cis-acting regulatory element involved in the MeJA-responsiveness
TaPIN41	CGTCA-motif	CGTCA	1460	5	-	Hordeum vulgare	cis-acting regulatory element involved in the MeJA-responsiveness
TaPIN41	ATC-motif	AGTAATCT	843	8	-	Spinacia oleracea	part of a conserved DNA module involved in light responsiveness
TaPIN41	MBS	CAACTG	682	6	-	Arabidopsis thaliana	MYB binding site involved in drought-inducibility
TaPIN41	TGACG-motif	TGACG	932	5	-	Hordeum vulgare	cis-acting regulatory element involved in the MeJA-responsiveness
TaPIN41	TGACG-motif	TGACG	1115	5	-	Hordeum vulgare	cis-acting regulatory element involved in the MeJA-responsiveness
TaPIN41	TGACG-motif	TGACG	1251	5	-	Hordeum vulgare	cis-acting regulatory element involved in the MeJA-responsiveness
TaPIN41	TGACG-motif	TGACG	1267	5	-	Hordeum vulgare	cis-acting regulatory element involved in the MeJA-responsiveness
TaPIN41	TGACG-motif	TGACG	1425	5	-	Hordeum vulgare	cis-acting regulatory element involved in the MeJA-responsiveness
TaPIN41	TGACG-motif	TGACG	1460	5	-	Hordeum vulgare	cis-acting regulatory element involved in the MeJA-responsiveness
TaPIN41	ABRE	ACGTG	1113	5	-	Arabidopsis thaliana	cis-acting element involved in the abscisic acid responsiveness
TaPIN41	ABRE	ACGTG	1427	5	-	Arabidopsis thaliana	cis-acting element involved in the abscisic acid responsiveness
TaPIN41	ABRE	GCCGCGTGGC	1842	9	-	Oryza sativa	cis-acting element involved in the abscisic acid responsiveness
TaPIN41	TCA-element	TCAGAAGAGG	641	9	-	Brassica oleracea	cis-acting element involved in salicylic acid responsiveness
TaPIN41	TCA-element	TCAGAAGAGG	768	9	-	Brassica oleracea	cis-acting element involved in salicylic acid responsiveness
TaPIN41	GC-motif	CCCCCG	1762	6	-	Zea mays	enhancer-like element involved in anoxic specific inducibility
TaPIN41	GC-motif	CCCCCG	1801	6	-	Zea mays	enhancer-like element involved in anoxic specific inducibility
TaPIN41	GC-motif	CCCCCG	1815	6	-	Zea mays	enhancer-like element involved in anoxic specific inducibility
TaPIN42	MRE	AACCTAA	1273	7	-	Petroselinum crispum	MYB binding site involved in light responsiveness
TaPIN42	G-Box	CACGTT	335	6	-	Pisum sativum	cis-acting regulatory element involved in light responsiveness
TaPIN42	TGACG-motif	TGACG	722	5	-	Hordeum vulgare	cis-acting regulatory element involved in the MeJA-responsiveness
TaPIN42	TGACG-motif	TGACG	1474	5	-	Hordeum vulgare	cis-acting regulatory element involved in the MeJA-responsiveness
TaPIN42	TGACG-motif	TGACG	1547	5	-	Hordeum vulgare	cis-acting regulatory element involved in the MeJA-responsiveness
TaPIN42	ACE	GACACGTATG	22	9	-	Petroselinum crispum	cis-acting element involved in light responsiveness
TaPIN42	ACE	GACACGTATG	47	9	-	Petroselinum crispum	cis-acting element involved in light responsiveness
TaPIN42	ABRE	ACGTG	336	5	-	Arabidopsis thaliana	cis-acting element involved in the abscisic acid responsiveness
TaPIN42	ABRE	ACGTG	1030	5	-	Arabidopsis thaliana	cis-acting element involved in the abscisic acid responsiveness
TaPIN42	ABRE	ACGTG	1529	5	-	Arabidopsis thaliana	cis-acting element involved in the abscisic acid responsiveness
TaPIN42	GT1-motif	GGTTAA	351	6	-	Arabidopsis thaliana	light responsive element
TaPIN42	GT1-motif	GGTTAA	571	6	-	Arabidopsis thaliana	light responsive element
TaPIN42	GT1-motif	GGTTAA	680	6	-	Arabidopsis thaliana	light responsive element
TaPIN42	GT1-motif	GGTTAA	1002	6	-	Arabidopsis thaliana	light responsive element
TaPIN42	GC-motif	CCCCCG	802	6	-	Zea mays	enhancer-like element involved in anoxic specific inducibility
TaPIN42	TCT-motif	TCTTAC	888	6	-	Arabidopsis thaliana	part of a light responsive element
TaPIN42	TCT-motif	TCTTAC	906	6	-	Arabidopsis thaliana	part of a light responsive element
TaPIN42	G-box	TACGTG	1030	6	-	Arabidopsis thaliana	cis-acting regulatory element involved in light responsiveness
TaPIN42	G-box	CACGAC	1459	6	-	Zea mays	cis-acting regulatory element involved in light responsiveness
TaPIN42	G-box	CACGTC	1529	6	-	Zea mays	cis-acting regulatory element involved in light responsiveness
TaPIN42	G-box	CACGAC	1795	6	-	Zea mays	cis-acting regulatory element involved in light responsiveness
TaPIN42	MBS	CAACTG	15	6	-	Arabidopsis thaliana	MYB binding site involved in drought-inducibility
TaPIN42	MBS	CAACTG	422	6	-	Arabidopsis thaliana	MYB binding site involved in drought-inducibility
TaPIN42	ARE	AAACCA	515	6	-	Zea mays	cis-acting regulatory element essential for the anaerobic induction
TaPIN42	CGTCA-motif	CGTCA	722	5	-	Hordeum vulgare	cis-acting regulatory element involved in the MeJA-responsiveness
TaPIN42	CGTCA-motif	CGTCA	1474	5	-	Hordeum vulgare	cis-acting regulatory element involved in the MeJA-responsiveness
TaPIN42	CGTCA-motif	CGTCA	1547	5	-	Hordeum vulgare	cis-acting regulatory element involved in the MeJA-responsiveness
TaPIN42	Box 4	ATTAAT	528	6	-	Petroselinum crispum	part of a conserved DNA module involved in light responsiveness
TaPIN42	Box 4	ATTAAT	1130	6	-	Petroselinum crispum	part of a conserved DNA module involved in light responsiveness
TaPIN43	MRE	AACCTAA	729	7	+	Petroselinum crispum	MYB binding site involved in light responsiveness
TaPIN43	MRE	AACCTAA	734	7	+	Petroselinum crispum	MYB binding site involved in light responsiveness
TaPIN43	chs-Unit 1 m1	ACCTAACCCGC	1726	10	+	Hordeum vulgare	part of a light responsive element
TaPIN43	ABRE	ACGTG	723	5	+	Arabidopsis thaliana	cis-acting element involved in the abscisic acid responsiveness
TaPIN43	ABRE	GCCGCGTGGC	1377	9	+	Oryza sativa	cis-acting element involved in the abscisic acid responsiveness
TaPIN43	ABRE	ACGTG	1566	5	+	Arabidopsis thaliana	cis-acting element involved in the abscisic acid responsiveness
TaPIN43	ABRE	ACGTG	1602	5	+	Arabidopsis thaliana	cis-acting element involved in the abscisic acid responsiveness
TaPIN43	Box 4	ATTAAT	185	6	+	Petroselinum crispum	part of a conserved DNA module involved in light responsiveness
TaPIN43	TGACG-motif	TGACG	11	5	+	Hordeum vulgare	cis-acting regulatory element involved in the MeJA-responsiveness
TaPIN43	TGACG-motif	TGACG	596	5	+	Hordeum vulgare	cis-acting regulatory element involved in the MeJA-responsiveness
TaPIN43	TGACG-motif	TGACG	1788	5	+	Hordeum vulgare	cis-acting regulatory element involved in the MeJA-responsiveness
TaPIN43	CGTCA-motif	CGTCA	11	5	+	Hordeum vulgare	cis-acting regulatory element involved in the MeJA-responsiveness
TaPIN43	CGTCA-motif	CGTCA	596	5	+	Hordeum vulgare	cis-acting regulatory element involved in the MeJA-responsiveness
TaPIN43	CGTCA-motif	CGTCA	1788	5	+	Hordeum vulgare	cis-acting regulatory element involved in the MeJA-responsiveness
TaPIN43	G-box	CACGAC	979	6	+	Zea mays	cis-acting regulatory element involved in light responsiveness
TaPIN43	G-box	CACGTC	1565	6	+	Zea mays	cis-acting regulatory element involved in light responsiveness
TaPIN43	G-box	CACGTC	1602	6	+	Zea mays	cis-acting regulatory element involved in light responsiveness
TaPIN43	G-box	CACGAC	1769	6	+	Zea mays	cis-acting regulatory element involved in light responsiveness
TaPIN43	Sp1	GGGCGG	584	6	+	Oryza sativa	light responsive element
TaPIN43	Sp1	GGGCGG	1271	6	+	Oryza sativa	light responsive element
TaPIN43	GT1-motif	GGTTAAT	311	7	+	Avena sativa	light responsive element
TaPIN43	GARE-motif	TCTGTTG	1925	7	+	Brassica oleracea	gibberellin-responsive element
TaPIN43	G-Box	CACGTT	722	6	+	Pisum sativum	cis-acting regulatory element involved in light responsiveness
TaPIN44	G-box	TACGTG	1770	6	+	Arabidopsis thaliana	cis-acting regulatory element involved in light responsiveness
TaPIN44	G-box	TACGTG	1849	6	+	Arabidopsis thaliana	cis-acting regulatory element involved in light responsiveness
TaPIN44	I-box	gGATAAGGTG	543	9	+	Zea mays	part of a light responsive element
TaPIN44	ARE	AAACCA	419	6	+	Zea mays	cis-acting regulatory element essential for the anaerobic induction
TaPIN44	ARE	AAACCA	509	6	+	Zea mays	cis-acting regulatory element essential for the anaerobic induction
TaPIN44	ARE	AAACCA	515	6	+	Zea mays	cis-acting regulatory element essential for the anaerobic induction
TaPIN44	ARE	AAACCA	696	6	+	Zea mays	cis-acting regulatory element essential for the anaerobic induction
TaPIN44	ARE	AAACCA	974	6	+	Zea mays	cis-acting regulatory element essential for the anaerobic induction
TaPIN44	ARE	AAACCA	1623	6	+	Zea mays	cis-acting regulatory element essential for the anaerobic induction
TaPIN44	ARE	AAACCA	1742	6	+	Zea mays	cis-acting regulatory element essential for the anaerobic induction
TaPIN44	LTR	CCGAAA	84	6	+	Hordeum vulgare	cis-acting element involved in low-temperature responsiveness
TaPIN44	CGTCA-motif	CGTCA	1400	5	+	Hordeum vulgare	cis-acting regulatory element involved in the MeJA-responsiveness
TaPIN44	ATCT-motif	AATCTAATCC	1829	9	+	Pisum sativum	part of a conserved DNA module involved in light responsiveness
TaPIN44	TGACG-motif	TGACG	1400	5	+	Hordeum vulgare	cis-acting regulatory element involved in the MeJA-responsiveness
TaPIN44	MRE	AACCTAA	1090	7	+	Petroselinum crispum	MYB binding site involved in light responsiveness
TaPIN44	GARE-motif	TCTGTTG	656	7	+	Brassica oleracea	gibberellin-responsive element
TaPIN44	G-Box	CACGTT	240	6	+	Pisum sativum	cis-acting regulatory element involved in light responsiveness
TaPIN44	ABRE	ACGTG	241	5	+	Arabidopsis thaliana	cis-acting element involved in the abscisic acid responsiveness
TaPIN44	ABRE	ACGTG	1771	5	+	Arabidopsis thaliana	cis-acting element involved in the abscisic acid responsiveness
TaPIN44	ABRE	ACGTG	1849	5	+	Arabidopsis thaliana	cis-acting element involved in the abscisic acid responsiveness
TaPIN44	CAT-box	GCCACT	1367	6	+	Arabidopsis thaliana	cis-acting regulatory element related to meristem expression
