# Supplementary material for: Genome-Wide Identification and Characterization of PIN-FORMED (PIN) Gene Family Reveals Role in Developmental and Various Stress Conditions in Triticum aestivum L
Source: Int J Mol Sci. 2021 Jul 9;22(14):7396. doi: 10.3390/ijms22147396 (PMC8303626; doi:10.3390/ijms22147396)
Supplement: Supplementary file 1 [file ijms-22-07396-s001.zip › Table S6.xls]

## Sheet: Sheet1
Table S6: Significant Go term predicted by AgriGo analysis
GO Accesion	Term_type	Term	Query item	Query total	Background item	Back ground total	p-value	FDR
GO:0010315	P	auxin efflux	28	44	100	85761	1.2e-69	1.7e-66
GO:0010928	P	regulation of auxin mediated signaling pathway	28	44	155	85761	7.5e-65	5.1e-62
GO:0010252	P	auxin homeostasis	26	44	113	85761	2.3e-62	1.1e-59
GO:0055085	P	transmembrane transport	44	44	5750	85761	2.7e-52	9.2e-50
GO:0060918	P	auxin transport	31	44	835	85761	3.6e-52	9.7e-50
GO:0009914	P	hormone transport	31	44	842	85761	4.6e-52	1e-49
GO:0009926	P	auxin polar transport	27	44	751	85761	2.7e-44	5.2e-42
GO:0009734	P	auxin-activated signaling pathway	28	44	1614	85761	1.9e-37	3.3e-35
GO:0071365	P	cellular response to auxin stimulus	28	44	1764	85761	2.2e-36	3.4e-34
GO:0010817	P	regulation of hormone levels	31	44	3580	85761	6e-33	8.1e-31
GO:0006810	P	transport	44	44	16882	85761	9.2e-32	1.1e-29
GO:0051234	P	establishment of localization	44	44	17156	85761	1.9e-31	2.1e-29
GO:0009958	P	positive gravitropism	17	44	271	85761	3.4e-31	3.6e-29
GO:0023051	P	regulation of signaling	28	44	3057	85761	7.7e-30	7e-28
GO:0009966	P	regulation of signal transduction	28	44	3054	85761	7.5e-30	7e-28
GO:0051179	P	localization	44	44	18699	85761	8.2e-30	7e-28
GO:0010646	P	regulation of cell communication	28	44	3071	85761	8.7e-30	7e-28
GO:0009733	P	response to auxin	28	44	3921	85761	6.8e-27	5.1e-25
GO:0048878	P	chemical homeostasis	26	44	3344	85761	1.3e-25	9.5e-24
GO:0009630	P	gravitropism	17	44	878	85761	9.3e-23	6.3e-21
GO:0009606	P	tropism	17	44	943	85761	3e-22	2e-20
GO:0009629	P	response to gravity	17	44	956	85761	3.8e-22	2.4e-20
GO:0044765	P	single-organism transport	31	44	8779	85761	2.9e-21	1.7e-19
GO:1902578	P	single-organism localization	31	44	8913	85761	4.5e-21	2.6e-19
GO:0048583	P	regulation of response to stimulus	28	44	7103	85761	5.9e-20	3.2e-18
GO:0009755	P	hormone-mediated signaling pathway	28	44	8230	85761	2.9e-18	1.5e-16
GO:0080162	P	intracellular auxin transport	6	44	6	85761	1.2e-17	5.5e-16
GO:0032870	P	cellular response to hormone stimulus	28	44	8667	85761	1.1e-17	5.5e-16
GO:0071495	P	cellular response to endogenous stimulus	28	44	8682	85761	1.2e-17	5.5e-16
GO:0043481	P	anthocyanin accumulation in tissues in response to UV light	11	44	318	85761	1.5e-17	6.3e-16
GO:0043480	P	pigment accumulation in tissues	11	44	318	85761	1.5e-17	6.3e-16
GO:0043478	P	pigment accumulation in response to UV light	11	44	318	85761	1.5e-17	6.3e-16
GO:0043479	P	pigment accumulation in tissues in response to UV light	11	44	318	85761	1.5e-17	6.3e-16
GO:0042592	P	homeostatic process	26	44	7067	85761	1.6e-17	6.3e-16
GO:0043473	P	pigmentation	11	44	321	85761	1.7e-17	6.4e-16
GO:0043476	P	pigment accumulation	11	44	321	85761	1.7e-17	6.4e-16
GO:0065008	P	regulation of biological quality	31	44	11825	85761	1.8e-17	6.5e-16
GO:0009798	P	axis specification	14	44	1038	85761	1.3e-16	4.7e-15
GO:0048766	P	root hair initiation	8	44	81	85761	1.7e-16	5.8e-15
GO:0010358	P	leaf shaping	8	44	102	85761	9.6e-16	3.3e-14
GO:0071310	P	cellular response to organic substance	28	44	10300	85761	1e-15	3.4e-14
GO:0008361	P	regulation of cell size	11	44	494	85761	1.7e-15	5.5e-14
GO:0009723	P	response to ethylene	17	44	2530	85761	3.3e-15	1e-13
GO:0098655	P	cation transmembrane transport	16	44	2130	85761	4.8e-15	1.5e-13
GO:0048826	P	cotyledon morphogenesis	8	44	128	85761	5.5e-15	1.7e-13
GO:0070887	P	cellular response to chemical stimulus	28	44	11665	85761	2.5e-14	7.4e-13
GO:0009637	P	response to blue light	11	44	693	85761	6.3e-14	1.8e-12
GO:0048598	P	embryonic morphogenesis	8	44	191	85761	1.2e-13	3.4e-12
GO:0009855	P	determination of bilateral symmetry	9	44	398	85761	6.8e-13	1.9e-11
GO:0009799	P	specification of symmetry	9	44	407	85761	8.3e-13	2.3e-11
GO:0060919	P	auxin influx	6	44	64	85761	1.6e-12	4.4e-11
GO:0007165	P	signal transduction	28	44	13882	85761	2e-12	5.3e-11
GO:0032535	P	regulation of cellular component size	11	44	982	85761	2.6e-12	6.5e-11
GO:0090066	P	regulation of anatomical structure size	11	44	982	85761	2.6e-12	6.5e-11
GO:0044700	P	single organism signaling	28	44	14083	85761	2.9e-12	7.2e-11
GO:0023052	P	signaling	28	44	14095	85761	3e-12	7.2e-11
GO:0010082	P	regulation of root meristem growth	8	44	290	85761	3.1e-12	7.3e-11
GO:0009725	P	response to hormone	28	44	14710	85761	8.6e-12	2e-10
GO:0034220	P	ion transmembrane transport	16	44	3567	85761	1.1e-11	2.6e-10
GO:0010073	P	meristem maintenance	14	44	2475	85761	1.5e-11	3.3e-10
GO:0010449	P	root meristem growth	8	44	364	85761	1.8e-11	4e-10
GO:0009640	P	photomorphogenesis	11	44	1187	85761	1.9e-11	4.2e-10
GO:0007389	P	pattern specification process	14	44	2598	85761	2.8e-11	6e-10
GO:0009719	P	response to endogenous stimulus	28	44	15578	85761	3.5e-11	7.5e-10
GO:0007154	P	cell communication	28	44	15984	85761	6.6e-11	1.4e-09
GO:0048825	P	cotyledon development	8	44	444	85761	8.4e-11	1.7e-09
GO:0010338	P	leaf formation	8	44	507	85761	2.3e-10	4.8e-09
GO:0010014	P	meristem initiation	9	44	802	85761	3e-10	6.1e-09
GO:0006812	P	cation transport	16	44	4669	85761	5.8e-10	1.2e-08
GO:0048507	P	meristem development	14	44	3564	85761	1.7e-09	3.2e-08
GO:0048532	P	anatomical structure arrangement	11	44	1851	85761	1.9e-09	3.7e-08
GO:0048438	P	floral whorl development	14	44	3617	85761	2e-09	3.8e-08
GO:0009942	P	longitudinal axis specification	8	44	678	85761	2.2e-09	4.1e-08
GO:0000578	P	embryonic axis specification	8	44	684	85761	2.4e-09	4.3e-08
GO:0010033	P	response to organic substance	28	44	18902	85761	3.8e-09	6.9e-08
GO:0048439	P	flower morphogenesis	6	44	251	85761	4.4e-09	7.8e-08
GO:0009880	P	embryonic pattern specification	8	44	804	85761	8.2e-09	1.4e-07
GO:0009793	P	embryo development ending in seed dormancy	14	44	4164	85761	1.2e-08	2.1e-07
GO:0010229	P	inflorescence development	8	44	871	85761	1.5e-08	2.6e-07
GO:0048466	P	androecium development	11	44	2278	85761	1.6e-08	2.7e-07
GO:0048443	P	stamen development	11	44	2278	85761	1.6e-08	2.7e-07
GO:0009790	P	embryo development	14	44	4280	85761	1.7e-08	2.8e-07
GO:0048437	P	floral organ development	14	44	4349	85761	2e-08	3.4e-07
GO:0051716	P	cellular response to stimulus	28	44	20324	85761	2.1e-08	3.4e-07
GO:2000280	P	regulation of root development	8	44	916	85761	2.2e-08	3.5e-07
GO:0048767	P	root hair elongation	8	44	1021	85761	5e-08	8e-07
GO:0046685	P	response to arsenic-containing substance	5	44	186	85761	5.2e-08	8.2e-07
GO:0009411	P	response to UV	11	44	2731	85761	1e-07	1.6e-06
GO:0009639	P	response to red or far red light	11	44	2741	85761	1e-07	1.6e-06
GO:0080147	P	root hair cell development	8	44	1141	85761	1.2e-07	1.8e-06
GO:0009749	P	response to glucose	8	44	1227	85761	2e-07	3e-06
GO:0009933	P	meristem structural organization	9	44	1751	85761	2.3e-07	3.5e-06
GO:0009886	P	post-embryonic morphogenesis	11	44	3031	85761	2.8e-07	4.2e-06
GO:0010051	P	xylem and phloem pattern formation	8	44	1378	85761	4.8e-07	7e-06
GO:0009887	P	organ morphogenesis	11	44	3227	85761	5.3e-07	7.6e-06
GO:0042221	P	response to chemical	28	44	23546	85761	5.9e-07	8.4e-06
GO:0006811	P	ion transport	16	44	7905	85761	9.1e-07	1.3e-05
GO:0048646	P	anatomical structure formation involved in morphogenesis	11	44	3480	85761	1.1e-06	1.5e-05
GO:0048364	P	root development	14	44	6189	85761	1.5e-06	2.1e-05
GO:0022622	P	root system development	14	44	6201	85761	1.5e-06	2.1e-05
GO:0048765	P	root hair cell differentiation	8	44	1620	85761	1.6e-06	2.1e-05
GO:0048764	P	trichoblast maturation	8	44	1620	85761	1.6e-06	2.1e-05
GO:0048469	P	cell maturation	8	44	1631	85761	1.7e-06	2.2e-05
GO:0009746	P	response to hexose	8	44	1639	85761	1.7e-06	2.3e-05
GO:0034284	P	response to monosaccharide	8	44	1650	85761	1.8e-06	2.4e-05
GO:0048827	P	phyllome development	14	44	6542	85761	2.9e-06	3.7e-05
GO:0009908	P	flower development	14	44	6564	85761	3e-06	3.8e-05
GO:0090567	P	reproductive shoot system development	14	44	6636	85761	3.4e-06	4.3e-05
GO:0048316	P	seed development	14	44	6660	85761	3.6e-06	4.5e-05
GO:0010154	P	fruit development	14	44	6845	85761	4.9e-06	6.1e-05
GO:0010075	P	regulation of meristem growth	8	44	1911	85761	5.3e-06	6.6e-05
GO:0010054	P	trichoblast differentiation	8	44	1922	85761	5.6e-06	6.8e-05
GO:0035266	P	meristem growth	8	44	2014	85761	7.8e-06	9.4e-05
GO:0010053	P	root epidermal cell differentiation	8	44	2046	85761	8.8e-06	0.0001
GO:0009965	P	leaf morphogenesis	8	44	2118	85761	1.1e-05	0.00013
GO:0009944	P	polarity specification of adaxial/abaxial axis	6	44	981	85761	1.1e-05	0.00013
GO:0065001	P	specification of axis polarity	6	44	984	85761	1.1e-05	0.00013
GO:0090627	P	plant epidermal cell differentiation	8	44	2125	85761	1.1e-05	0.00013
GO:0009943	P	adaxial/abaxial axis specification	6	44	1000	85761	1.2e-05	0.00014
GO:0009888	P	tissue development	14	44	7473	85761	1.3e-05	0.00015
GO:0003002	P	regionalization	8	44	2179	85761	1.4e-05	0.00016
GO:0009955	P	adaxial/abaxial pattern specification	6	44	1065	85761	1.8e-05	0.0002
GO:0050794	P	regulation of cellular process	28	44	27690	85761	2e-05	0.00022
GO:0048509	P	regulation of meristem development	8	44	2306	85761	2.1e-05	0.00023
GO:0009416	P	response to light stimulus	14	44	7773	85761	2.1e-05	0.00023
GO:0009624	P	response to nematode	6	44	1158	85761	2.8e-05	0.0003
GO:0009314	P	response to radiation	14	44	8067	85761	3.2e-05	0.00034
GO:0000904	P	cell morphogenesis involved in differentiation	8	44	2549	85761	4.2e-05	0.00045
GO:0009743	P	response to carbohydrate	8	44	2616	85761	5e-05	0.00053
GO:0048588	P	developmental cell growth	8	44	2687	85761	6.1e-05	0.00063
GO:0048638	P	regulation of developmental growth	8	44	2766	85761	7.4e-05	0.00077
GO:0065007	P	biological regulation	31	44	35465	85761	9e-05	0.00093
GO:0048367	P	shoot system development	14	44	8919	85761	9.6e-05	0.00098
GO:0007275	P	multicellular organism development	22	44	20549	85761	0.00016	0.0016
GO:0050789	P	regulation of biological process	28	44	30871	85761	0.00018	0.0018
GO:0010089	P	xylem development	6	44	1649	85761	0.00019	0.0019
GO:0048513	P	animal organ development	11	44	6088	85761	0.0002	0.002
GO:0010016	P	shoot system morphogenesis	8	44	3316	85761	0.00026	0.0025
GO:0044036	P	cell wall macromolecule metabolic process	6	44	1817	85761	0.00032	0.0032
GO:0010087	P	phloem or xylem histogenesis	6	44	1818	85761	0.00032	0.0032
GO:0009653	P	anatomical structure morphogenesis	14	44	10401	85761	0.00049	0.0047
GO:0040008	P	regulation of growth	8	44	3670	85761	0.0005	0.0048
GO:0021700	P	developmental maturation	8	44	3717	85761	0.00055	0.0052
GO:0090558	P	plant epidermis development	8	44	3782	85761	0.00061	0.0058
GO:0010015	P	root morphogenesis	8	44	3786	85761	0.00062	0.0058
GO:0099402	P	plant organ development	14	44	10673	85761	0.00063	0.0059
GO:0048468	P	cell development	8	44	3806	85761	0.00064	0.0059
GO:0044767	P	single-organism developmental process	22	44	22628	85761	0.00069	0.0064
GO:0009165	P	nucleotide biosynthetic process	6	44	2123	85761	0.00073	0.0067
GO:1901293	P	nucleoside phosphate biosynthetic process	6	44	2135	85761	0.00075	0.0068
GO:0048856	P	anatomical structure development	22	44	22911	85761	0.00083	0.0075
GO:0032502	P	developmental process	22	44	23141	85761	0.00096	0.0086
GO:0044707	P	single-multicellular organism process	22	44	23276	85761	0.001	0.0093
GO:0009605	P	response to external stimulus	17	44	15659	85761	0.0012	0.011
GO:0048608	P	reproductive structure development	14	44	11435	85761	0.0013	0.011
GO:0061458	P	reproductive system development	14	44	11435	85761	0.0013	0.011
GO:0048366	P	leaf development	8	44	4388	85761	0.0016	0.014
GO:0009555	P	pollen development	8	44	4408	85761	0.0016	0.014
GO:0060560	P	developmental growth involved in morphogenesis	8	44	4443	85761	0.0017	0.015
GO:2000026	P	regulation of multicellular organismal development	8	44	4592	85761	0.0021	0.018
GO:0032501	P	multicellular organismal process	22	44	24629	85761	0.0023	0.02
GO:0000902	P	cell morphogenesis	8	44	4721	85761	0.0025	0.021
GO:0009812	P	flavonoid metabolic process	6	44	2850	85761	0.0032	0.027
GO:1902582	P	single-organism intracellular transport	6	44	2946	85761	0.0038	0.032
GO:1902580	P	single-organism cellular localization	6	44	2980	85761	0.004	0.033
GO:0016049	P	cell growth	8	44	5205	85761	0.0046	0.038
GO:0051239	P	regulation of multicellular organismal process	8	44	5433	85761	0.0059	0.048
GO:0003006	P	developmental process involved in reproduction	14	44	13497	85761	0.006	0.049
GO:0044702	P	single organism reproductive process	14	44	13681	85761	0.0068	0.055
GO:0032989	P	cellular component morphogenesis	8	44	5593	85761	0.007	0.056
GO:0048229	P	gametophyte development	8	44	5751	85761	0.0082	0.066
GO:0009791	P	post-embryonic development	14	44	14295	85761	0.01	0.079
GO:0048589	P	developmental growth	8	44	6124	85761	0.012	0.093
GO:0050896	P	response to stimulus	28	44	39029	85761	0.012	0.093
GO:0090407	P	organophosphate biosynthetic process	6	44	3847	85761	0.013	0.1
GO:0050793	P	regulation of developmental process	8	44	6509	85761	0.017	0.13
GO:0022414	P	reproductive process	14	44	15247	85761	0.017	0.13
GO:0000003	P	reproduction	14	44	15261	85761	0.017	0.13
GO:0009117	P	nucleotide metabolic process	6	44	4105	85761	0.018	0.14
GO:0006753	P	nucleoside phosphate metabolic process	6	44	4119	85761	0.018	0.14
GO:0044763	P	single-organism cellular process	28	44	40376	85761	0.02	0.15
GO:0055086	P	nucleobase-containing small molecule metabolic process	6	44	4314	85761	0.022	0.17
GO:0009628	P	response to abiotic stimulus	17	44	21261	85761	0.029	0.22
GO:0030154	P	cell differentiation	8	44	7284	85761	0.03	0.22
GO:0040007	P	growth	8	44	7381	85761	0.032	0.24
GO:0048731	P	system development	14	44	16520	85761	0.033	0.24
GO:0048519	P	negative regulation of biological process	9	44	8864	85761	0.034	0.25
GO:0046907	P	intracellular transport	6	44	4933	85761	0.039	0.28
GO:0051649	P	establishment of localization in cell	6	44	5253	85761	0.051	0.36
GO:0019637	P	organophosphate metabolic process	6	44	5805	85761	0.075	0.54
GO:0044699	P	single-organism process	31	44	50975	85761	0.089	0.64
GO:0071554	P	cell wall organization or biogenesis	6	44	6366	85761	0.11	0.75
GO:0048869	P	cellular developmental process	8	44	9509	85761	0.11	0.77
GO:0016043	P	cellular component organization	14	44	19949	85761	0.12	0.87
GO:0044281	P	small molecule metabolic process	6	44	14959	85761	0.8	1
GO:1901362	P	organic cyclic compound biosynthetic process	6	44	18790	85761	0.94	1
GO:1901360	P	organic cyclic compound metabolic process	6	44	27558	85761	1	1
GO:0044711	P	single-organism biosynthetic process	6	44	16047	85761	0.86	1
GO:0043207	P	response to external biotic stimulus	6	44	12485	85761	0.63	1
GO:0046483	P	heterocycle metabolic process	6	44	25227	85761	1	1
GO:0051707	P	response to other organism	6	44	12482	85761	0.63	1
GO:0051704	P	multi-organism process	6	44	16180	85761	0.86	1
GO:0009607	P	response to biotic stimulus	6	44	12580	85761	0.64	1
GO:0019438	P	aromatic compound biosynthetic process	6	44	17826	85761	0.92	1
GO:0044710	P	single-organism metabolic process	6	44	27869	85761	1	1
GO:0008152	P	metabolic process	6	44	57664	85761	1	1
GO:0006807	P	nitrogen compound metabolic process	6	44	29364	85761	1	1
GO:1901576	P	organic substance biosynthetic process	6	44	31446	85761	1	1
GO:0044260	P	cellular macromolecule metabolic process	6	44	36166	85761	1	1
GO:0071840	P	cellular component organization or biogenesis	14	44	21407	85761	0.19	1
GO:0018130	P	heterocycle biosynthetic process	6	44	17011	85761	0.89	1
GO:0034654	P	nucleobase-containing compound biosynthetic process	6	44	14983	85761	0.8	1
GO:0044271	P	cellular nitrogen compound biosynthetic process	6	44	19482	85761	0.95	1
GO:0009058	P	biosynthetic process	6	44	32675	85761	1	1
GO:0044249	P	cellular biosynthetic process	6	44	30853	85761	1	1
GO:0034641	P	cellular nitrogen compound metabolic process	6	44	27157	85761	1	1
GO:0006139	P	nucleobase-containing compound metabolic process	6	44	22725	85761	0.99	1
GO:0044238	P	primary metabolic process	6	44	47561	85761	1	1
GO:0009987	P	cellular process	28	44	58786	85761	0.81	1
GO:0006725	P	cellular aromatic compound metabolic process	6	44	26836	85761	1	1
GO:0043170	P	macromolecule metabolic process	6	44	38931	85761	1	1
GO:0071704	P	organic substance metabolic process	6	44	51371	85761	1	1
GO:0006793	P	phosphorus metabolic process	6	44	14329	85761	0.77	1
GO:0051641	P	cellular localization	6	44	7140	85761	0.16	1
GO:1901700	P	response to oxygen-containing compound	8	44	17327	85761	0.69	1
GO:0044237	P	cellular metabolic process	6	44	49214	85761	1	1
GO:0006796	P	phosphate-containing compound metabolic process	6	44	14274	85761	0.76	1
GO:0080161	F	auxin transmembrane transporter activity	29	44	125	85761	3.1e-70	1.7e-68
GO:0010329	F	auxin efflux transmembrane transporter activity	28	44	101	85761	1.6e-69	4.3e-68
GO:0015562	F	efflux transmembrane transporter activity	28	44	205	85761	1e-61	1.9e-60
GO:0009672	F	auxin:proton symporter activity	16	44	34	85761	4.9e-42	6.7e-41
GO:0022891	F	substrate-specific transmembrane transporter activity	29	44	4554	85761	1.2e-26	1.3e-25
GO:0022892	F	substrate-specific transporter activity	29	44	4937	85761	1.2e-25	1.1e-24
GO:0022857	F	transmembrane transporter activity	29	44	5237	85761	6.1e-25	4.7e-24
GO:0005215	F	transporter activity	29	44	6287	85761	1e-22	6.7e-22
GO:0015294	F	solute:cation symporter activity	16	44	880	85761	5.6e-21	3.3e-20
GO:0015293	F	symporter activity	16	44	1054	85761	9.2e-20	5e-19
GO:0015291	F	secondary active transmembrane transporter activity	16	44	1846	85761	5.3e-16	2.6e-15
GO:0008324	F	cation transmembrane transporter activity	16	44	2822	85761	3.4e-13	1.5e-12
GO:0022804	F	active transmembrane transporter activity	16	44	2945	85761	6.5e-13	2.7e-12
GO:0015075	F	ion transmembrane transporter activity	16	44	3453	85761	7e-12	2.7e-11
GO:0005515	F	protein binding	8	44	31444	85761	1	1
GO:0005488	F	binding	8	44	58931	85761	1	1
GO:0045178	C	basal part of cell	17	44	17	85761	7.7e-49	4.8e-47
GO:0009925	C	basal plasma membrane	17	44	17	85761	7.7e-49	4.8e-47
GO:0016323	C	basolateral plasma membrane	17	44	17	85761	7.7e-49	4.8e-47
GO:0000323	C	lytic vacuole	17	44	319	85761	5e-30	2.3e-28
GO:0098590	C	plasma membrane region	17	44	434	85761	7.9e-28	3e-26
GO:0016021	C	integral component of membrane	44	44	22715	85761	4.2e-26	1.3e-24
GO:0031224	C	intrinsic component of membrane	44	44	23309	85761	1.3e-25	3.5e-24
GO:0044425	C	membrane part	44	44	25117	85761	3.5e-24	8.2e-23
GO:0005783	C	endoplasmic reticulum	26	44	6204	85761	6.5e-19	1.4e-17
GO:0016020	C	membrane	44	44	33934	85761	2e-18	3.7e-17
GO:0016328	C	lateral plasma membrane	8	44	49	85761	3.9e-18	6.7e-17
GO:0044459	C	plasma membrane part	17	44	2630	85761	6.1e-15	9.6e-14
GO:0005886	C	plasma membrane	30	44	15639	85761	5.2e-13	7.5e-12
GO:0012505	C	endomembrane system	26	44	11525	85761	1.9e-12	2.5e-11
GO:0012506	C	vesicle membrane	8	44	366	85761	1.9e-11	2.3e-10
GO:0045177	C	apical part of cell	8	44	412	85761	4.7e-11	5.5e-10
GO:0071944	C	cell periphery	30	44	19068	85761	1e-10	1.1e-09
GO:0009986	C	cell surface	8	44	711	85761	3.2e-09	3.3e-08
GO:0031982	C	vesicle	8	44	976	85761	3.6e-08	3.5e-07
GO:0005773	C	vacuole	17	44	8086	85761	2.1e-07	1.9e-06
GO:0005789	C	endoplasmic reticulum membrane	9	44	2645	85761	6.8e-06	6e-05
GO:0042175	C	nuclear outer membrane-endoplasmic reticulum membrane network	9	44	2658	85761	7.1e-06	6e-05
GO:0044432	C	endoplasmic reticulum part	9	44	2755	85761	9.4e-06	7.7e-05
GO:0044444	C	cytoplasmic part	29	44	40994	85761	0.012	0.092
GO:0009505	C	plant-type cell wall	6	44	4353	85761	0.023	0.17
GO:0031090	C	organelle membrane	8	44	7998	85761	0.049	0.35
GO:0055044	C	symplast	6	44	6078	85761	0.089	0.56
GO:0030054	C	cell junction	6	44	6105	85761	0.09	0.56
GO:0009506	C	plasmodesma	6	44	6078	85761	0.089	0.56
GO:0005911	C	cell-cell junction	6	44	6102	85761	0.09	0.56
GO:0030312	C	external encapsulating structure	6	44	6243	85761	0.098	0.57
GO:0005618	C	cell wall	6	44	6231	85761	0.097	0.57
GO:0005737	C	cytoplasm	29	44	47682	85761	0.11	0.62
GO:0043231	C	intracellular membrane-bounded organelle	29	44	54543	85761	0.44	1
GO:0044422	C	organelle part	14	44	21477	85761	0.19	1
GO:0043229	C	intracellular organelle	29	44	55574	85761	0.51	1
GO:0044424	C	intracellular part	29	44	60136	85761	0.78	1
GO:0005623	C	cell	31	44	65175	85761	0.85	1
GO:0044464	C	cell part	31	44	65148	85761	0.85	1
GO:0043227	C	membrane-bounded organelle	29	44	54652	85761	0.45	1
GO:0044446	C	intracellular organelle part	9	44	21339	85761	0.8	1
GO:0043226	C	organelle	29	44	55713	85761	0.52	1
GO:0005622	C	intracellular	29	44	60496	85761	0.8	1
