# Supplementary material for: Genome-Wide Identification and Characterization of PIN-FORMED (PIN) Gene Family Reveals Role in Developmental and Various Stress Conditions in Triticum aestivum L
Source: Int J Mol Sci. 2021 Jul 9;22(14):7396. doi: 10.3390/ijms22147396 (PMC8303626; doi:10.3390/ijms22147396)
Supplement: Supplementary file 1 [file ijms-22-07396-s001.zip › Table S7.xls]

## Sheet: Sheet1
Table S7. Gene annotation using eggNOGmapper.
Gene Name	Seed ortholog	e-value	Score	Predicted_name	GO terms	EC number	KEGG KO	eggNOG Ogs	Best OG	COG cat	Description
TaPIN1	4533.OB05G34360.1	5.9e-186	657.5	PIN4	GO:0000003,GO:0000578,GO:0000902,GO:0000904,GO:0003006,GO:0003674,GO:0005215,GO:0005575,GO:0005622,GO:0005623,GO:0005737,GO:0005783,GO:0005886,GO:0005911,GO:0006810,GO:0007275,GO:0007389,GO:0008150,GO:0009314,GO:0009416,GO:0009506,GO:0009605,GO:0009606,GO:0009628,GO:0009629,GO:0009630,GO:0009653,GO:0009790,GO:0009791,GO:0009793,GO:0009798,GO:0009880,GO:0009888,GO:0009914,GO:0009926,GO:0009942,GO:…		ko:K13947	28J8N@1,2QRM7@2759,37IC4@33090,3G8Z9@35493,3IEVZ@38820,3M21G@4447	NA|NA|NA	P	May act as a component of the auxin efflux carrier
TaPIN2	4533.OB05G34360.1	2.7e-191	675.2	PIN4	GO:0000003,GO:0000578,GO:0000902,GO:0000904,GO:0003006,GO:0003674,GO:0005215,GO:0005575,GO:0005622,GO:0005623,GO:0005737,GO:0005783,GO:0005886,GO:0005911,GO:0006810,GO:0007275,GO:0007389,GO:0008150,GO:0009314,GO:0009416,GO:0009506,GO:0009605,GO:0009606,GO:0009628,GO:0009629,GO:0009630,GO:0009653,GO:0009790,GO:0009791,GO:0009793,GO:0009798,GO:0009880,GO:0009888,GO:0009914,GO:0009926,GO:0009942,GO:…		ko:K13947	28J8N@1,2QRM7@2759,37IC4@33090,3G8Z9@35493,3IEVZ@38820,3M21G@4447	NA|NA|NA	P	May act as a component of the auxin efflux carrier
TaPIN3	4533.OB05G34360.1	1.9e-192	679.1	PIN4	GO:0000003,GO:0000578,GO:0000902,GO:0000904,GO:0003006,GO:0003674,GO:0005215,GO:0005575,GO:0005622,GO:0005623,GO:0005737,GO:0005783,GO:0005886,GO:0005911,GO:0006810,GO:0007275,GO:0007389,GO:0008150,GO:0009314,GO:0009416,GO:0009506,GO:0009605,GO:0009606,GO:0009628,GO:0009629,GO:0009630,GO:0009653,GO:0009790,GO:0009791,GO:0009793,GO:0009798,GO:0009880,GO:0009888,GO:0009914,GO:0009926,GO:0009942,GO:…		ko:K13947	28J8N@1,2QRM7@2759,37IC4@33090,3G8Z9@35493,3IEVZ@38820,3M21G@4447	NA|NA|NA	P	May act as a component of the auxin efflux carrier
TaPIN4	4572.TRIUR3_26006-P1	5.1e-275	953.4	PIN4	GO:0000003,GO:0000578,GO:0000902,GO:0000904,GO:0003006,GO:0003674,GO:0005215,GO:0005575,GO:0005622,GO:0005623,GO:0005737,GO:0005783,GO:0005886,GO:0005911,GO:0006810,GO:0007275,GO:0007389,GO:0008150,GO:0009314,GO:0009416,GO:0009506,GO:0009605,GO:0009606,GO:0009628,GO:0009629,GO:0009630,GO:0009653,GO:0009790,GO:0009791,GO:0009793,GO:0009798,GO:0009880,GO:0009888,GO:0009914,GO:0009921,GO:0009926,GO:…		ko:K13947	28J8N@1,2QRM7@2759,37IC4@33090,3G8Z9@35493,3I96M@38820,3KY91@4447	NA|NA|NA	P	May act as a component of the auxin efflux carrier
TaPIN5	4565.Traes_3AL_824C884AB.1	3.6e-191	674.1	PIN8	GO:0003674,GO:0005215,GO:0005575,GO:0005622,GO:0005623,GO:0005737,GO:0005783,GO:0005886,GO:0006810,GO:0007275,GO:0008150,GO:0009555,GO:0009914,GO:0009926,GO:0009966,GO:0010252,GO:0010315,GO:0010329,GO:0010646,GO:0010817,GO:0010928,GO:0012505,GO:0015562,GO:0016020,GO:0022857,GO:0023051,GO:0032501,GO:0032502,GO:0042592,GO:0043226,GO:0043227,GO:0043229,GO:0043231,GO:0044424,GO:0044444,GO:0044464,GO:…		ko:K13947	28J8N@1,2QS5F@2759,37KCH@33090,3GF58@35493,3I8ZY@38820,3KXAG@4447	NA|NA|NA	P	May act as a component of the auxin efflux carrier
TaPIN6	4572.TRIUR3_31257-P1	1.6e-185	655.6				ko:K13947	28J8N@1,2RFRD@2759,37RUJ@33090,3GFB0@35493,3I3EI@38820,3KYUY@4447	NA|NA|NA	P	May act as a component of the auxin efflux carrier
TaPIN7	4565.Traes_3B_75B5E6338.1	8.2e-194	682.9		GO:0003674,GO:0005215,GO:0005575,GO:0005622,GO:0005623,GO:0005737,GO:0005783,GO:0005886,GO:0006810,GO:0008150,GO:0009914,GO:0009926,GO:0009966,GO:0010252,GO:0010315,GO:0010329,GO:0010646,GO:0010817,GO:0010928,GO:0012505,GO:0015562,GO:0016020,GO:0022857,GO:0023051,GO:0042592,GO:0043226,GO:0043227,GO:0043229,GO:0043231,GO:0044424,GO:0044444,GO:0044464,GO:0048583,GO:0048878,GO:0050789,GO:0050794,GO:…		ko:K13947	28J8N@1,2QS1X@2759,37HEN@33090,3GCG1@35493,3IB09@38820,3KQ9D@4447	NA|NA|NA	U	May act as a component of the auxin efflux carrier
TaPIN8	4572.TRIUR3_26006-P1	2.5e-248	864.8	PIN4	GO:0000003,GO:0000578,GO:0000902,GO:0000904,GO:0003006,GO:0003674,GO:0005215,GO:0005575,GO:0005622,GO:0005623,GO:0005737,GO:0005783,GO:0005886,GO:0005911,GO:0006810,GO:0007275,GO:0007389,GO:0008150,GO:0009314,GO:0009416,GO:0009506,GO:0009605,GO:0009606,GO:0009628,GO:0009629,GO:0009630,GO:0009653,GO:0009790,GO:0009791,GO:0009793,GO:0009798,GO:0009880,GO:0009888,GO:0009914,GO:0009921,GO:0009926,GO:…		ko:K13947	28J8N@1,2QRM7@2759,37IC4@33090,3G8Z9@35493,3I96M@38820,3KY91@4447	NA|NA|NA	P	May act as a component of the auxin efflux carrier
TaPIN9	4565.Traes_3B_029EBFE82.1	4.7e-191	673.7	PIN8	GO:0003674,GO:0005215,GO:0005575,GO:0005622,GO:0005623,GO:0005737,GO:0005783,GO:0005886,GO:0006810,GO:0007275,GO:0008150,GO:0009555,GO:0009914,GO:0009926,GO:0009966,GO:0010252,GO:0010315,GO:0010329,GO:0010646,GO:0010817,GO:0010928,GO:0012505,GO:0015562,GO:0016020,GO:0022857,GO:0023051,GO:0032501,GO:0032502,GO:0042592,GO:0043226,GO:0043227,GO:0043229,GO:0043231,GO:0044424,GO:0044444,GO:0044464,GO:…		ko:K13947	28J8N@1,2QS5F@2759,37KCH@33090,3GF58@35493,3I8ZY@38820,3KXAG@4447	NA|NA|NA	P	May act as a component of the auxin efflux carrier
TaPIN10	4513.MLOC_38122.1	2.3e-184	651.7				ko:K13947	28J8N@1,2RFRD@2759,37RUJ@33090,3GFB0@35493,3I3EI@38820,3KYUY@4447	NA|NA|NA	P	May act as a component of the auxin efflux carrier
TaPIN11	4565.Traes_3B_75B5E6338.1	1.3e-199	702.2		GO:0003674,GO:0005215,GO:0005575,GO:0005622,GO:0005623,GO:0005737,GO:0005783,GO:0005886,GO:0006810,GO:0008150,GO:0009914,GO:0009926,GO:0009966,GO:0010252,GO:0010315,GO:0010329,GO:0010646,GO:0010817,GO:0010928,GO:0012505,GO:0015562,GO:0016020,GO:0022857,GO:0023051,GO:0042592,GO:0043226,GO:0043227,GO:0043229,GO:0043231,GO:0044424,GO:0044444,GO:0044464,GO:0048583,GO:0048878,GO:0050789,GO:0050794,GO:…		ko:K13947	28J8N@1,2QS1X@2759,37HEN@33090,3GCG1@35493,3IB09@38820,3KQ9D@4447	NA|NA|NA	U	May act as a component of the auxin efflux carrier
TaPIN12	4572.TRIUR3_26006-P1	2.9e-246	857.8	PIN4	GO:0000003,GO:0000578,GO:0000902,GO:0000904,GO:0003006,GO:0003674,GO:0005215,GO:0005575,GO:0005622,GO:0005623,GO:0005737,GO:0005783,GO:0005886,GO:0005911,GO:0006810,GO:0007275,GO:0007389,GO:0008150,GO:0009314,GO:0009416,GO:0009506,GO:0009605,GO:0009606,GO:0009628,GO:0009629,GO:0009630,GO:0009653,GO:0009790,GO:0009791,GO:0009793,GO:0009798,GO:0009880,GO:0009888,GO:0009914,GO:0009921,GO:0009926,GO:…		ko:K13947	28J8N@1,2QRM7@2759,37IC4@33090,3G8Z9@35493,3I96M@38820,3KY91@4447	NA|NA|NA	P	May act as a component of the auxin efflux carrier
TaPIN13	4565.Traes_3DL_603D16B0C.1	8e-191	672.9	PIN8	GO:0003674,GO:0005215,GO:0005575,GO:0005622,GO:0005623,GO:0005737,GO:0005783,GO:0005886,GO:0006810,GO:0007275,GO:0008150,GO:0009555,GO:0009914,GO:0009926,GO:0009966,GO:0010252,GO:0010315,GO:0010329,GO:0010646,GO:0010817,GO:0010928,GO:0012505,GO:0015562,GO:0016020,GO:0022857,GO:0023051,GO:0032501,GO:0032502,GO:0042592,GO:0043226,GO:0043227,GO:0043229,GO:0043231,GO:0044424,GO:0044444,GO:0044464,GO:…		ko:K13947	28J8N@1,2QS5F@2759,37KCH@33090,3GF58@35493,3I8ZY@38820,3KXAG@4447	NA|NA|NA	P	May act as a component of the auxin efflux carrier
TaPIN14	4513.MLOC_38122.1	1.1e-186	659.4				ko:K13947	28J8N@1,2RFRD@2759,37RUJ@33090,3GFB0@35493,3I3EI@38820,3KYUY@4447	NA|NA|NA	P	May act as a component of the auxin efflux carrier
TaPIN15	4565.Traes_3B_75B5E6338.1	6.5e-191	673.3		GO:0003674,GO:0005215,GO:0005575,GO:0005622,GO:0005623,GO:0005737,GO:0005783,GO:0005886,GO:0006810,GO:0008150,GO:0009914,GO:0009926,GO:0009966,GO:0010252,GO:0010315,GO:0010329,GO:0010646,GO:0010817,GO:0010928,GO:0012505,GO:0015562,GO:0016020,GO:0022857,GO:0023051,GO:0042592,GO:0043226,GO:0043227,GO:0043229,GO:0043231,GO:0044424,GO:0044444,GO:0044464,GO:0048583,GO:0048878,GO:0050789,GO:0050794,GO:…		ko:K13947	28J8N@1,2QS1X@2759,37HEN@33090,3GCG1@35493,3IB09@38820,3KQ9D@4447	NA|NA|NA	U	May act as a component of the auxin efflux carrier
TaPIN16	4565.Traes_4DS_2FF3D9312.1	3.1e-269	934.1		GO:0003674,GO:0005215,GO:0005575,GO:0005622,GO:0005623,GO:0005737,GO:0005783,GO:0005886,GO:0006810,GO:0008150,GO:0009914,GO:0009926,GO:0009966,GO:0010252,GO:0010315,GO:0010329,GO:0010646,GO:0010817,GO:0010928,GO:0012505,GO:0015562,GO:0016020,GO:0022857,GO:0023051,GO:0042592,GO:0043226,GO:0043227,GO:0043229,GO:0043231,GO:0044424,GO:0044444,GO:0044464,GO:0048583,GO:0048878,GO:0050789,GO:0050794,GO:…		ko:K13947	28J8N@1,2QS61@2759,37QRD@33090,3GDA5@35493,3IE76@38820,3KVRP@4447	NA|NA|NA	P	May act as a component of the auxin efflux carrier
TaPIN17	4565.Traes_4BS_3A8709BF2.2	6.2e-286	989.6		GO:0003674,GO:0005215,GO:0005575,GO:0005622,GO:0005623,GO:0005737,GO:0005783,GO:0005886,GO:0006810,GO:0008150,GO:0009914,GO:0009926,GO:0009966,GO:0010252,GO:0010315,GO:0010329,GO:0010646,GO:0010817,GO:0010928,GO:0012505,GO:0015562,GO:0016020,GO:0022857,GO:0023051,GO:0042592,GO:0043226,GO:0043227,GO:0043229,GO:0043231,GO:0044424,GO:0044444,GO:0044464,GO:0048583,GO:0048878,GO:0050789,GO:0050794,GO:…		ko:K13947	28J8N@1,2QS61@2759,37QRD@33090,3GDA5@35493,3IE76@38820,3KVRP@4447	NA|NA|NA	P	May act as a component of the auxin efflux carrier
TaPIN18	4565.Traes_4DS_2FF3D9312.1	6.2e-286	989.6		GO:0003674,GO:0005215,GO:0005575,GO:0005622,GO:0005623,GO:0005737,GO:0005783,GO:0005886,GO:0006810,GO:0008150,GO:0009914,GO:0009926,GO:0009966,GO:0010252,GO:0010315,GO:0010329,GO:0010646,GO:0010817,GO:0010928,GO:0012505,GO:0015562,GO:0016020,GO:0022857,GO:0023051,GO:0042592,GO:0043226,GO:0043227,GO:0043229,GO:0043231,GO:0044424,GO:0044444,GO:0044464,GO:0048583,GO:0048878,GO:0050789,GO:0050794,GO:…		ko:K13947	28J8N@1,2QS61@2759,37QRD@33090,3GDA5@35493,3IE76@38820,3KVRP@4447	NA|NA|NA	P	May act as a component of the auxin efflux carrier
TaPIN19	4565.Traes_5DL_C7D873451.1	1.9e-163	582.0	PIN5	GO:0003674,GO:0005215,GO:0005575,GO:0005622,GO:0005623,GO:0005737,GO:0005783,GO:0005886,GO:0006810,GO:0007275,GO:0008150,GO:0009555,GO:0009914,GO:0009926,GO:0009966,GO:0010252,GO:0010315,GO:0010329,GO:0010646,GO:0010817,GO:0010928,GO:0012505,GO:0015562,GO:0016020,GO:0022857,GO:0023051,GO:0032501,GO:0032502,GO:0042592,GO:0043226,GO:0043227,GO:0043229,GO:0043231,GO:0044424,GO:0044444,GO:0044464,GO:…		ko:K13947	28J8N@1,2QS1X@2759,37HEN@33090,3GCG1@35493,3I2BP@38820,3M30R@4447	NA|NA|NA	U	May act as a component of the auxin efflux carrier
TaPIN20	4572.TRIUR3_18388-P1	5.9e-147	527.3	PIN5	GO:0003674,GO:0005215,GO:0005575,GO:0005622,GO:0005623,GO:0005737,GO:0005783,GO:0005886,GO:0006810,GO:0007275,GO:0008150,GO:0009555,GO:0009914,GO:0009926,GO:0009966,GO:0010252,GO:0010315,GO:0010329,GO:0010646,GO:0010817,GO:0010928,GO:0012505,GO:0015562,GO:0016020,GO:0022857,GO:0023051,GO:0032501,GO:0032502,GO:0042592,GO:0043226,GO:0043227,GO:0043229,GO:0043231,GO:0044424,GO:0044444,GO:0044464,GO:…		ko:K13947	28J8N@1,2QS1X@2759,37HEN@33090,3GCG1@35493,3I2BP@38820,3M30R@4447	NA|NA|NA	U	May act as a component of the auxin efflux carrier
TaPIN21	4555.Si032859m	5.3e-110	404.4	PIN5	GO:0003674,GO:0005215,GO:0005575,GO:0005622,GO:0005623,GO:0005737,GO:0005783,GO:0005886,GO:0006810,GO:0007275,GO:0008150,GO:0009555,GO:0009914,GO:0009926,GO:0009966,GO:0010252,GO:0010315,GO:0010329,GO:0010646,GO:0010817,GO:0010928,GO:0012505,GO:0015562,GO:0016020,GO:0022857,GO:0023051,GO:0032501,GO:0032502,GO:0042592,GO:0043226,GO:0043227,GO:0043229,GO:0043231,GO:0044424,GO:0044444,GO:0044464,GO:…		ko:K13947	28J8N@1,2QS1X@2759,37HEN@33090,3GCG1@35493,3I2BP@38820,3M30R@4447	NA|NA|NA	U	May act as a component of the auxin efflux carrier
TaPIN22	4565.Traes_5DL_C7D873451.1	1e-156	559.7	PIN5	GO:0003674,GO:0005215,GO:0005575,GO:0005622,GO:0005623,GO:0005737,GO:0005783,GO:0005886,GO:0006810,GO:0007275,GO:0008150,GO:0009555,GO:0009914,GO:0009926,GO:0009966,GO:0010252,GO:0010315,GO:0010329,GO:0010646,GO:0010817,GO:0010928,GO:0012505,GO:0015562,GO:0016020,GO:0022857,GO:0023051,GO:0032501,GO:0032502,GO:0042592,GO:0043226,GO:0043227,GO:0043229,GO:0043231,GO:0044424,GO:0044444,GO:0044464,GO:…		ko:K13947	28J8N@1,2QS1X@2759,37HEN@33090,3GCG1@35493,3I2BP@38820,3M30R@4447	NA|NA|NA	U	May act as a component of the auxin efflux carrier
TaPIN23	4565.Traes_5BL_72367F4FA.1	1.1e-187	662.5	PIN5	GO:0003674,GO:0005215,GO:0005575,GO:0005622,GO:0005623,GO:0005737,GO:0005783,GO:0005886,GO:0006810,GO:0007275,GO:0008150,GO:0009555,GO:0009914,GO:0009926,GO:0009966,GO:0010252,GO:0010315,GO:0010329,GO:0010646,GO:0010817,GO:0010928,GO:0012505,GO:0015562,GO:0016020,GO:0022857,GO:0023051,GO:0032501,GO:0032502,GO:0042592,GO:0043226,GO:0043227,GO:0043229,GO:0043231,GO:0044424,GO:0044444,GO:0044464,GO:…		ko:K13947	28J8N@1,2QS1X@2759,37HEN@33090,3GCG1@35493,3I2BP@38820,3M30R@4447	NA|NA|NA	U	May act as a component of the auxin efflux carrier
TaPIN24	4572.TRIUR3_18388-P1	9.8e-163	579.7	PIN5	GO:0003674,GO:0005215,GO:0005575,GO:0005622,GO:0005623,GO:0005737,GO:0005783,GO:0005886,GO:0006810,GO:0007275,GO:0008150,GO:0009555,GO:0009914,GO:0009926,GO:0009966,GO:0010252,GO:0010315,GO:0010329,GO:0010646,GO:0010817,GO:0010928,GO:0012505,GO:0015562,GO:0016020,GO:0022857,GO:0023051,GO:0032501,GO:0032502,GO:0042592,GO:0043226,GO:0043227,GO:0043229,GO:0043231,GO:0044424,GO:0044444,GO:0044464,GO:…		ko:K13947	28J8N@1,2QS1X@2759,37HEN@33090,3GCG1@35493,3I2BP@38820,3M30R@4447	NA|NA|NA	U	May act as a component of the auxin efflux carrier
TaPIN25	4572.TRIUR3_18388-P1	2.2e-141	508.8	PIN5	GO:0003674,GO:0005215,GO:0005575,GO:0005622,GO:0005623,GO:0005737,GO:0005783,GO:0005886,GO:0006810,GO:0007275,GO:0008150,GO:0009555,GO:0009914,GO:0009926,GO:0009966,GO:0010252,GO:0010315,GO:0010329,GO:0010646,GO:0010817,GO:0010928,GO:0012505,GO:0015562,GO:0016020,GO:0022857,GO:0023051,GO:0032501,GO:0032502,GO:0042592,GO:0043226,GO:0043227,GO:0043229,GO:0043231,GO:0044424,GO:0044444,GO:0044464,GO:…		ko:K13947	28J8N@1,2QS1X@2759,37HEN@33090,3GCG1@35493,3I2BP@38820,3M30R@4447	NA|NA|NA	U	May act as a component of the auxin efflux carrier
TaPIN26	4565.Traes_5DL_C7D873451.1	5.2e-177	627.1	PIN5	GO:0003674,GO:0005215,GO:0005575,GO:0005622,GO:0005623,GO:0005737,GO:0005783,GO:0005886,GO:0006810,GO:0007275,GO:0008150,GO:0009555,GO:0009914,GO:0009926,GO:0009966,GO:0010252,GO:0010315,GO:0010329,GO:0010646,GO:0010817,GO:0010928,GO:0012505,GO:0015562,GO:0016020,GO:0022857,GO:0023051,GO:0032501,GO:0032502,GO:0042592,GO:0043226,GO:0043227,GO:0043229,GO:0043231,GO:0044424,GO:0044444,GO:0044464,GO:…		ko:K13947	28J8N@1,2QS1X@2759,37HEN@33090,3GCG1@35493,3I2BP@38820,3M30R@4447	NA|NA|NA	U	May act as a component of the auxin efflux carrier
TaPIN27	4572.TRIUR3_18388-P1	1.7e-162	578.9	PIN5	GO:0003674,GO:0005215,GO:0005575,GO:0005622,GO:0005623,GO:0005737,GO:0005783,GO:0005886,GO:0006810,GO:0007275,GO:0008150,GO:0009555,GO:0009914,GO:0009926,GO:0009966,GO:0010252,GO:0010315,GO:0010329,GO:0010646,GO:0010817,GO:0010928,GO:0012505,GO:0015562,GO:0016020,GO:0022857,GO:0023051,GO:0032501,GO:0032502,GO:0042592,GO:0043226,GO:0043227,GO:0043229,GO:0043231,GO:0044424,GO:0044444,GO:0044464,GO:…		ko:K13947	28J8N@1,2QS1X@2759,37HEN@33090,3GCG1@35493,3I2BP@38820,3M30R@4447	NA|NA|NA	U	May act as a component of the auxin efflux carrier
TaPIN28	4572.TRIUR3_18388-P1	8.5e-146	523.5	PIN5	GO:0003674,GO:0005215,GO:0005575,GO:0005622,GO:0005623,GO:0005737,GO:0005783,GO:0005886,GO:0006810,GO:0007275,GO:0008150,GO:0009555,GO:0009914,GO:0009926,GO:0009966,GO:0010252,GO:0010315,GO:0010329,GO:0010646,GO:0010817,GO:0010928,GO:0012505,GO:0015562,GO:0016020,GO:0022857,GO:0023051,GO:0032501,GO:0032502,GO:0042592,GO:0043226,GO:0043227,GO:0043229,GO:0043231,GO:0044424,GO:0044444,GO:0044464,GO:…		ko:K13947	28J8N@1,2QS1X@2759,37HEN@33090,3GCG1@35493,3I2BP@38820,3M30R@4447	NA|NA|NA	U	May act as a component of the auxin efflux carrier
TaPIN29	37682.EMT10264	1.8e-124	452.6	PIN5	GO:0003674,GO:0005215,GO:0005575,GO:0005622,GO:0005623,GO:0005737,GO:0005783,GO:0005886,GO:0006810,GO:0007275,GO:0008150,GO:0009555,GO:0009914,GO:0009926,GO:0009966,GO:0010252,GO:0010315,GO:0010329,GO:0010646,GO:0010817,GO:0010928,GO:0012505,GO:0015562,GO:0016020,GO:0022857,GO:0023051,GO:0032501,GO:0032502,GO:0042592,GO:0043226,GO:0043227,GO:0043229,GO:0043231,GO:0044424,GO:0044444,GO:0044464,GO:…		ko:K13947	28J8N@1,2QS1X@2759,37HEN@33090,3GCG1@35493,3I2BP@38820,3M30R@4447	NA|NA|NA	U	May act as a component of the auxin efflux carrier
TaPIN30	4513.MLOC_64867.2	0.0	1125.5	PIN1	GO:0000003,GO:0003002,GO:0003006,GO:0003674,GO:0005215,GO:0005575,GO:0005618,GO:0005622,GO:0005623,GO:0005737,GO:0005783,GO:0005886,GO:0005911,GO:0006810,GO:0007154,GO:0007165,GO:0007275,GO:0007389,GO:0008150,GO:0009314,GO:0009416,GO:0009505,GO:0009506,GO:0009605,GO:0009606,GO:0009628,GO:0009629,GO:0009630,GO:0009639,GO:0009640,GO:0009653,GO:0009719,GO:0009725,GO:0009733,GO:0009734,GO:0009755,GO:…		ko:K13947	28J8N@1,2QRM7@2759,37JUJ@33090,3GFSN@35493,3IABS@38820,3KY9F@4447	NA|NA|NA	P	May act as a component of the auxin efflux carrier
TaPIN31	4513.MLOC_64867.2	1.8e-271	941.4	PIN1	GO:0000003,GO:0003002,GO:0003006,GO:0003674,GO:0005215,GO:0005575,GO:0005618,GO:0005622,GO:0005623,GO:0005737,GO:0005783,GO:0005886,GO:0005911,GO:0006810,GO:0007154,GO:0007165,GO:0007275,GO:0007389,GO:0008150,GO:0009314,GO:0009416,GO:0009505,GO:0009506,GO:0009605,GO:0009606,GO:0009628,GO:0009629,GO:0009630,GO:0009639,GO:0009640,GO:0009653,GO:0009719,GO:0009725,GO:0009733,GO:0009734,GO:0009755,GO:…		ko:K13947	28J8N@1,2QRM7@2759,37JUJ@33090,3GFSN@35493,3IABS@38820,3KY9F@4447	NA|NA|NA	P	May act as a component of the auxin efflux carrier
TaPIN32	4513.MLOC_64867.2	0.0	1117.8	PIN1	GO:0000003,GO:0003002,GO:0003006,GO:0003674,GO:0005215,GO:0005575,GO:0005618,GO:0005622,GO:0005623,GO:0005737,GO:0005783,GO:0005886,GO:0005911,GO:0006810,GO:0007154,GO:0007165,GO:0007275,GO:0007389,GO:0008150,GO:0009314,GO:0009416,GO:0009505,GO:0009506,GO:0009605,GO:0009606,GO:0009628,GO:0009629,GO:0009630,GO:0009639,GO:0009640,GO:0009653,GO:0009719,GO:0009725,GO:0009733,GO:0009734,GO:0009755,GO:…		ko:K13947	28J8N@1,2QRM7@2759,37JUJ@33090,3GFSN@35493,3IABS@38820,3KY9F@4447	NA|NA|NA	P	May act as a component of the auxin efflux carrier
TaPIN33	40149.OMERI06G09450.1	4.1e-277	960.3	PIN1	GO:0000003,GO:0003002,GO:0003006,GO:0003674,GO:0005215,GO:0005575,GO:0005618,GO:0005622,GO:0005623,GO:0005737,GO:0005783,GO:0005886,GO:0005911,GO:0006810,GO:0007275,GO:0007389,GO:0008150,GO:0009314,GO:0009416,GO:0009505,GO:0009506,GO:0009605,GO:0009606,GO:0009628,GO:0009629,GO:0009630,GO:0009639,GO:0009640,GO:0009653,GO:0009790,GO:0009791,GO:0009793,GO:0009908,GO:0009914,GO:0009925,GO:0009926,GO:…		ko:K13947	28J8N@1,2QRM7@2759,37JUJ@33090,3GFSN@35493,3IFMQ@38820,3KY9F@4447	NA|NA|NA	P	May act as a component of the auxin efflux carrier
TaPIN34	4572.TRIUR3_33485-P1	1e-180	639.4	PIN5	GO:0003674,GO:0005215,GO:0005575,GO:0005622,GO:0005623,GO:0005737,GO:0005783,GO:0005886,GO:0006810,GO:0007275,GO:0008150,GO:0009555,GO:0009914,GO:0009926,GO:0009966,GO:0010252,GO:0010315,GO:0010329,GO:0010646,GO:0010817,GO:0010928,GO:0012505,GO:0015562,GO:0016020,GO:0022857,GO:0023051,GO:0032501,GO:0032502,GO:0042592,GO:0043226,GO:0043227,GO:0043229,GO:0043231,GO:0044424,GO:0044444,GO:0044464,GO:…		ko:K13947	28J8N@1,2QS1X@2759,37HEN@33090,3GCG1@35493,3I2EY@38820,3M5YT@4447	NA|NA|NA	P	May act as a component of the auxin efflux carrier
TaPIN35	4565.Traes_7DL_9589FBBE5.1	3.2e-307	1060.4	PIN2	GO:0000323,GO:0001666,GO:0003674,GO:0005215,GO:0005575,GO:0005622,GO:0005623,GO:0005737,GO:0005773,GO:0005783,GO:0005886,GO:0006810,GO:0006950,GO:0008150,GO:0009605,GO:0009606,GO:0009628,GO:0009629,GO:0009630,GO:0009719,GO:0009723,GO:0009725,GO:0009733,GO:0009743,GO:0009746,GO:0009749,GO:0009914,GO:0009921,GO:0009925,GO:0009926,GO:0009958,GO:0009966,GO:0010033,GO:0010252,GO:0010315,GO:0010329,GO:…		ko:K13947	28J8N@1,2QV64@2759,37IVN@33090,3GB79@35493,3I9U4@38820,3KU2Z@4447	NA|NA|NA	P	May act as a component of the auxin efflux carrier
TaPIN36	37682.EMT33514	2.1e-276	958.0	PIN1	GO:0000003,GO:0003002,GO:0003006,GO:0003674,GO:0005215,GO:0005575,GO:0005618,GO:0005622,GO:0005623,GO:0005737,GO:0005783,GO:0005886,GO:0005911,GO:0006810,GO:0007275,GO:0007389,GO:0008150,GO:0009314,GO:0009416,GO:0009505,GO:0009506,GO:0009605,GO:0009606,GO:0009628,GO:0009629,GO:0009630,GO:0009639,GO:0009640,GO:0009653,GO:0009790,GO:0009791,GO:0009793,GO:0009908,GO:0009914,GO:0009925,GO:0009926,GO:…		ko:K13947	28J8N@1,2QRM7@2759,37JUJ@33090,3GFSN@35493,3IFMQ@38820,3KY9F@4447	NA|NA|NA	P	May act as a component of the auxin efflux carrier
TaPIN37	4513.MLOC_38122.1	1.2e-137	496.5				ko:K13947	28J8N@1,2RFRD@2759,37RUJ@33090,3GFB0@35493,3I3EI@38820,3KYUY@4447	NA|NA|NA	P	May act as a component of the auxin efflux carrier
TaPIN38	4513.MLOC_38122.1	1.9e-132	479.2				ko:K13947	28J8N@1,2RFRD@2759,37RUJ@33090,3GFB0@35493,3I3EI@38820,3KYUY@4447	NA|NA|NA	P	May act as a component of the auxin efflux carrier
TaPIN39	77586.LPERR01G29530.1	1.3e-133	483.0	PIN9	GO:0003674,GO:0005215,GO:0005575,GO:0005622,GO:0005623,GO:0005737,GO:0005783,GO:0005886,GO:0006810,GO:0008150,GO:0009914,GO:0009926,GO:0009966,GO:0010252,GO:0010315,GO:0010329,GO:0010646,GO:0010817,GO:0010928,GO:0012505,GO:0015562,GO:0016020,GO:0022857,GO:0023051,GO:0042592,GO:0043226,GO:0043227,GO:0043229,GO:0043231,GO:0044424,GO:0044444,GO:0044464,GO:0048583,GO:0048878,GO:0050789,GO:0050794,GO:…		ko:K13947	28J8N@1,2RFRD@2759,37RUJ@33090,3GFB0@35493,3I3EI@38820,3KYUY@4447	NA|NA|NA	P	May act as a component of the auxin efflux carrier
TaPIN40	4565.Traes_7DL_9589FBBE5.1	9.9e-309	1065.4	PIN2	GO:0000323,GO:0001666,GO:0003674,GO:0005215,GO:0005575,GO:0005622,GO:0005623,GO:0005737,GO:0005773,GO:0005783,GO:0005886,GO:0006810,GO:0006950,GO:0008150,GO:0009605,GO:0009606,GO:0009628,GO:0009629,GO:0009630,GO:0009719,GO:0009723,GO:0009725,GO:0009733,GO:0009743,GO:0009746,GO:0009749,GO:0009914,GO:0009921,GO:0009925,GO:0009926,GO:0009958,GO:0009966,GO:0010033,GO:0010252,GO:0010315,GO:0010329,GO:…		ko:K13947	28J8N@1,2QV64@2759,37IVN@33090,3GB79@35493,3I9U4@38820,3KU2Z@4447	NA|NA|NA	P	May act as a component of the auxin efflux carrier
TaPIN41	37682.EMT33514	1.4e-277	961.8	PIN1	GO:0000003,GO:0003002,GO:0003006,GO:0003674,GO:0005215,GO:0005575,GO:0005618,GO:0005622,GO:0005623,GO:0005737,GO:0005783,GO:0005886,GO:0005911,GO:0006810,GO:0007275,GO:0007389,GO:0008150,GO:0009314,GO:0009416,GO:0009505,GO:0009506,GO:0009605,GO:0009606,GO:0009628,GO:0009629,GO:0009630,GO:0009639,GO:0009640,GO:0009653,GO:0009790,GO:0009791,GO:0009793,GO:0009908,GO:0009914,GO:0009925,GO:0009926,GO:…		ko:K13947	28J8N@1,2QRM7@2759,37JUJ@33090,3GFSN@35493,3IFMQ@38820,3KY9F@4447	NA|NA|NA	P	May act as a component of the auxin efflux carrier
TaPIN42	37682.EMT08432	3.6e-189	667.5	PIN5	GO:0003674,GO:0005215,GO:0005575,GO:0005622,GO:0005623,GO:0005737,GO:0005783,GO:0005886,GO:0006810,GO:0007275,GO:0008150,GO:0009555,GO:0009914,GO:0009926,GO:0009966,GO:0010252,GO:0010315,GO:0010329,GO:0010646,GO:0010817,GO:0010928,GO:0012505,GO:0015562,GO:0016020,GO:0022857,GO:0023051,GO:0032501,GO:0032502,GO:0042592,GO:0043226,GO:0043227,GO:0043229,GO:0043231,GO:0044424,GO:0044444,GO:0044464,GO:…		ko:K13947	28J8N@1,2QS1X@2759,37HEN@33090,3GCG1@35493,3I2EY@38820,3M5YT@4447	NA|NA|NA	P	May act as a component of the auxin efflux carrier
TaPIN43	37682.EMT23067	2.9e-143	514.6				ko:K13947	28J8N@1,2RFRD@2759,37RUJ@33090,3GFB0@35493,3I3EI@38820,3KYUY@4447	NA|NA|NA	P	May act as a component of the auxin efflux carrier
TaPIN44	4565.Traes_7DL_9589FBBE5.1	7.9e-311	1072.4	PIN2	GO:0000323,GO:0001666,GO:0003674,GO:0005215,GO:0005575,GO:0005622,GO:0005623,GO:0005737,GO:0005773,GO:0005783,GO:0005886,GO:0006810,GO:0006950,GO:0008150,GO:0009605,GO:0009606,GO:0009628,GO:0009629,GO:0009630,GO:0009719,GO:0009723,GO:0009725,GO:0009733,GO:0009743,GO:0009746,GO:0009749,GO:0009914,GO:0009921,GO:0009925,GO:0009926,GO:0009958,GO:0009966,GO:0010033,GO:0010252,GO:0010315,GO:0010329,GO:…		ko:K13947	28J8N@1,2QV64@2759,37IVN@33090,3GB79@35493,3I9U4@38820,3KU2Z@4447	NA|NA|NA	P	May act as a component of the auxin efflux carrier
