# Supplementary material for: Genome-Wide Identification and Characterization of PIN-FORMED (PIN) Gene Family Reveals Role in Developmental and Various Stress Conditions in Triticum aestivum L
Source: Int J Mol Sci. 2021 Jul 9;22(14):7396. doi: 10.3390/ijms22147396 (PMC8303626; doi:10.3390/ijms22147396)
Supplement: Supplementary file 1 [file ijms-22-07396-s001.zip › Table S8.xls]

## Sheet: Sheet1
Table S8: The protein-protein interaction network between TaPIN and other proteins in wheat
Node1	Node2	Neighborhood_on_chromosome	Gene_fusion	Phylogenetic_cooccurrence	Homology	Coexpression	Experimentally_determined_interaction	Database_annotated	Automated_textmining	Combined_score
TaPIN15	Traes_5BL_458576406.1	0	0	0	0	0	0.104	0	0.469	0.503
TaPIN15	Traes_5BS_174531189.1	0	0	0	0	0	0.104	0	0.502	0.534
TaPIN15	Traes_5DS_1F610E80B.1	0	0	0	0	0	0.104	0	0.502	0.534
TaPIN15	Traes_5DS_2B0D2D352.1	0	0	0	0	0	0.104	0	0.502	0.534
TaPIN15	Traes_7DS_E15592456.1	0	0	0	0	0	0.073	0	0.6	0.613
TaPIN17	Traes_7DS_E15592456.1	0	0	0	0	0	0.073	0	0.687	0.697
TaPIN23	Traes_5BL_458576406.1	0	0	0	0	0	0.104	0	0.469	0.503
TaPIN23	Traes_5BS_174531189.1	0	0	0	0	0	0.104	0	0.469	0.503
TaPIN23	Traes_5DS_1F610E80B.1	0	0	0	0	0	0.104	0	0.469	0.503
TaPIN23	Traes_5DS_2B0D2D352.1	0	0	0	0	0	0.104	0	0.469	0.503
TaPIN23	Traes_7DS_E15592456.1	0	0	0	0	0	0.073	0	0.6	0.613
TaPIN32	TaPIN8	0	0	0	0.973	0	0	0.432	0.863	0.445
TaPIN32	Traes_5BL_458576406.1	0	0	0	0	0	0.755	0	0.723	0.929
TaPIN32	Traes_5BS_174531189.1	0	0	0	0	0	0.755	0	0.723	0.929
TaPIN32	Traes_5DS_1F610E80B.1	0	0	0	0	0	0.755	0	0.723	0.929
TaPIN32	Traes_5DS_2B0D2D352.1	0	0	0	0	0	0.755	0	0.723	0.929
TaPIN32	TaPIN44	0	0	0	0.915	0	0	0.498	0.809	0.532
TaPIN32	Traes_7DS_E15592456.1	0	0	0	0	0	0.735	0	0.629	0.897
TaPIN32	Traes_7AL_B8CD6C57F.1	0	0	0	0	0	0	0.498	0.809	0.9
TaPIN34	Traes_5BL_458576406.1	0	0	0	0	0	0.104	0	0.469	0.503
TaPIN34	Traes_5BS_174531189.1	0	0	0	0	0	0.104	0	0.469	0.503
TaPIN34	Traes_5DS_1F610E80B.1	0	0	0	0	0	0.104	0	0.469	0.503
TaPIN34	Traes_5DS_2B0D2D352.1	0	0	0	0	0	0.104	0	0.469	0.503
TaPIN34	Traes_7AL_B8CD6C57F.1	0	0	0	0	0	0	0	0.687	0.687
TaPIN34	Traes_7DS_E15592456.1	0	0	0	0	0	0.073	0	0.6	0.613
TaPIN38	Traes_5BL_458576406.1	0	0	0	0	0	0.104	0	0.382	0.422
TaPIN38	Traes_5BS_174531189.1	0	0	0	0	0	0.104	0	0.449	0.485
TaPIN38	Traes_5DS_1F610E80B.1	0	0	0	0	0	0.104	0	0.449	0.485
TaPIN38	Traes_5DS_2B0D2D352.1	0	0	0	0	0	0.104	0	0.449	0.485
TaPIN38	Traes_7DS_E15592456.1	0	0	0	0	0	0.073	0	0.556	0.57
TaPIN39	Traes_5BS_174531189.1	0	0	0	0	0	0.104	0	0.661	0.683
TaPIN39	Traes_5DS_1F610E80B.1	0	0	0	0	0	0.104	0	0.661	0.683
TaPIN39	Traes_5BL_458576406.1	0	0	0	0	0	0.104	0	0.661	0.683
TaPIN39	Traes_5DS_2B0D2D352.1	0	0	0	0	0	0.104	0	0.661	0.683
TaPIN39	Traes_7DS_E15592456.1	0	0	0	0	0	0.073	0	0.723	0.732
TaPIN41	Traes_7DS_E15592456.1	0	0	0	0	0	0.073	0	0.687	0.697
TaPIN42	Traes_5BL_458576406.1	0	0	0	0	0	0.104	0	0.469	0.503
TaPIN42	Traes_5BS_174531189.1	0	0	0	0	0	0.104	0	0.469	0.503
TaPIN42	Traes_5DS_1F610E80B.1	0	0	0	0	0	0.104	0	0.469	0.503
TaPIN42	Traes_5DS_2B0D2D352.1	0	0	0	0	0	0.104	0	0.469	0.503
TaPIN42	Traes_7DS_E15592456.1	0	0	0	0	0	0.073	0	0.6	0.613
TaPIN44	Traes_3AL_AE39295DA.2	0	0	0	0	0	0.78	0	0.704	0.932
TaPIN44	TaPIN8	0	0	0	0.967	0	0	0.869	0.684	0.871
TaPIN44	Traes_3B_330E75723.1	0	0	0	0	0	0.78	0	0.704	0.932
TaPIN44	Traes_3DL_6354F0A2B.1	0	0	0	0	0	0.78	0	0.704	0.932
TaPIN44	Traes_3DL_D3ADD8C4B.1	0	0	0	0	0	0.78	0	0.704	0.932
TaPIN44	Traes_5BL_458576406.1	0	0	0	0	0	0.769	0	0.774	0.945
TaPIN44	Traes_5BS_174531189.1	0	0	0	0	0	0.769	0	0.774	0.945
TaPIN44	Traes_5DS_1F610E80B.1	0	0	0	0	0	0.769	0	0.774	0.945
TaPIN44	Traes_5DS_2B0D2D352.1	0	0	0	0	0	0.769	0	0.774	0.945
TaPIN44	Traes_7DS_E15592456.1	0	0	0	0	0	0.745	0	0.784	0.942
TaPIN5	Traes_5BS_174531189.1	0	0	0	0	0	0.104	0	0.661	0.683
TaPIN5	Traes_5DS_1F610E80B.1	0	0	0	0	0	0.104	0	0.661	0.683
TaPIN5	Traes_5BL_458576406.1	0	0	0	0	0	0.104	0	0.661	0.683
TaPIN5	Traes_5DS_2B0D2D352.1	0	0	0	0	0	0.104	0	0.661	0.683
TaPIN5	Traes_7DS_E15592456.1	0	0	0	0	0	0.073	0	0.723	0.732
TaPIN8	Traes_5BS_174531189.1	0	0	0	0	0	0.139	0	0.723	0.751
TaPIN8	Traes_5DS_1F610E80B.1	0	0	0	0	0	0.139	0	0.723	0.751
TaPIN8	Traes_5BL_458576406.1	0	0	0	0	0	0.139	0	0.723	0.751
TaPIN8	Traes_5DS_2B0D2D352.1	0	0	0	0	0	0.139	0	0.723	0.751
TaPIN8	Traes_7DS_E15592456.1	0	0	0	0	0.043	0.1	0	0.764	0.778
TaPIN8	Traes_7AL_B8CD6C57F.1	0	0	0	0	0	0	0.869	0.684	0.956
TaPIN9	Traes_5BS_174531189.1	0	0	0	0	0	0.104	0	0.661	0.683
TaPIN9	Traes_5DS_1F610E80B.1	0	0	0	0	0	0.104	0	0.661	0.683
TaPIN9	Traes_5BL_458576406.1	0	0	0	0	0	0.104	0	0.661	0.683
TaPIN9	Traes_5DS_2B0D2D352.1	0	0	0	0	0	0.104	0	0.661	0.683
TaPIN9	Traes_7DS_E15592456.1	0	0	0	0	0	0.073	0	0.723	0.732
Traes_3AL_AE39295DA.2	Traes_7DS_E15592456.1	0	0	0	0	0	0	0.414	0.204	0.513
Traes_3AL_AE39295DA.2	Traes_7AL_B8CD6C57F.1	0	0	0	0	0	0.78	0	0.704	0.932
Traes_3B_330E75723.1	Traes_7DS_E15592456.1	0	0	0	0	0	0	0.414	0.204	0.513
Traes_3B_330E75723.1	Traes_7AL_B8CD6C57F.1	0	0	0	0	0	0.78	0	0.704	0.932
Traes_3DL_6354F0A2B.1	Traes_7DS_E15592456.1	0	0	0	0	0	0	0.414	0.204	0.513
Traes_3DL_6354F0A2B.1	Traes_7AL_B8CD6C57F.1	0	0	0	0	0	0.78	0	0.704	0.932
Traes_3DL_D3ADD8C4B.1	Traes_7DS_E15592456.1	0	0	0	0	0	0	0.414	0.204	0.513
Traes_3DL_D3ADD8C4B.1	Traes_7AL_B8CD6C57F.1	0	0	0	0	0	0.78	0	0.704	0.932
Traes_5BL_458576406.1	Traes_7DS_E15592456.1	0	0	0	0	0	0	0	0.786	0.786
Traes_5BL_458576406.1	Traes_7AL_B8CD6C57F.1	0	0	0	0	0	0.769	0	0.774	0.945
Traes_5BS_174531189.1	Traes_7DS_E15592456.1	0	0	0	0	0	0	0	0.786	0.786
Traes_5BS_174531189.1	Traes_7AL_B8CD6C57F.1	0	0	0	0	0	0.769	0	0.774	0.945
Traes_5DS_1F610E80B.1	Traes_7DS_E15592456.1	0	0	0	0	0	0	0	0.786	0.786
Traes_5DS_1F610E80B.1	Traes_7AL_B8CD6C57F.1	0	0	0	0	0	0.769	0	0.774	0.945
Traes_5DS_2B0D2D352.1	Traes_7DS_E15592456.1	0	0	0	0	0	0	0	0.786	0.786
Traes_5DS_2B0D2D352.1	Traes_7AL_B8CD6C57F.1	0	0	0	0	0	0.769	0	0.774	0.945
Traes_7AL_B8CD6C57F.1	Traes_7DS_E15592456.1	0	0	0	0	0	0.745	0	0.784	0.942
