# Supplementary material for: Genome-Wide Identification and Characterization of PIN-FORMED (PIN) Gene Family Reveals Role in Developmental and Various Stress Conditions in Triticum aestivum L
Source: Int J Mol Sci. 2021 Jul 9;22(14):7396. doi: 10.3390/ijms22147396 (PMC8303626; doi:10.3390/ijms22147396)
Supplement: Supplementary file 1 [file ijms-22-07396-s001.zip › Table S9.xls]

## Sheet: Sheet1
Table S9. qRT-PCR primers of TaPIN genes.
Gene name	Primer name	Sequence (5'-3')
TaPIN7	qPTaPIN7-F	GGCTGCACTACCTCAATCAA
	qPTaPIN7-R	GGGAGACAAGCATCCCAAA
TaPIN8	qPTaPIN8-F	CCTTTCCCGTCTCAGAAGTAGTA
	qPTaPIN8-R	GGGACAACCATGCGGATTT
TaPIN9	qPTaPIN9-F	GGAGCTACACAACAGACATACC
	qPTaPIN9-R	ACTTCATCCCAATCACCAACA
TaPIN11	qPTaPIN11-F	GTCCTTAGTACTGCGGTGATTT
	qPTaPIN11-R	AGGCTCTGCGTCTACCTAAT
TaPIN14	qPTaPIN14-F	ATACCTATGCCAGCTTCCTTG
	qPTaPIN14-R	GTGAACAGTGAGTCGTCGATTA
TaPIN15	qPTaPIN15-F	GAGCCTTGGATACATCAGGAAA
	qPTaPIN15-R	ATGGGATGAGGAATGTAGTTATGAG
TaPIN22	qPTaPIN22-F	CGGGCCACTAAAGAGATGAC
	qPTaPIN22-R	CAAGTGCGACATGATCAGAAAC
TaPIN26	qPTaPIN26-F	CCTAACCCTAGGGACTGACTAA
	qPTaPIN26-R	GAGGGTGTTAGTTGCAGTGAT
TaPIN28	qPTaPIN28-F	GGCCTTGGAATCGGAATGT
	qPTaPIN28-R	CCATGCCCAACGAGGTTAAT
TaPIN37	qPTaPIN37-F	TGGTCCTCAAGTTTCTGATAGG
	qPTaPIN37-R	CTGCCTGTACAACAGCAATAC
TaActin	TaActin-F	CTCCCTCACAACAACCGC
	TaActin-R	TACCAGGAACTTCCATACCAAC
